# Supplementary material for: Implicit motor imagery performance is impaired in people with chronic, but not acute, neck pain
Source: PeerJ. 2020 Feb 14;8:e8553. doi: 10.7717/peerj.8553 (PMC7025709; doi:10.7717/peerj.8553)
Supplement: Supplemental Information 4 — Each data point indicates the average performance of 40 images. [file peerj-08-8553-s004.xlsx]

## Sheet: Sheet1
ID	Gender	Handedness	Year_of_birth	Acute_chronic_grouping	Neck_pain_with_movement	Side_specific_neckpain_direction	Movement_related_NP_direction	T2_ave_time	T2_ave_percent	T2_log_accuracy	T2_log_acc_leftimages	T2_log_acc_rightimages	left_turning_time_ave	Right_turning_time_ave	T5_ave_time	T5_ave_percent	T5_log_accuracy
7XoHaY	1	1	1981	1	2	3	2	1448.58	1	0	0	0	1599.3	1297.85	1656.9	1	0
Rg3IFT	1	1	1955	1	2	3	2	1466.15	0.9	-0.05	-0.05	-0.05	1676.55	1255.75	2089.65	0.85	-0.07
EZHwPm	1	1	1986	1	2	3	1	1131	0.95	-0.02	0	-0.05	1115.75	1146.25	1383.2	0.98	-0.01
MTi0cW	0	1	1977	2	2	3	1	1169.55	0.9	-0.05	-0.07	-0.02	1144.25	1194.85	1767	0.95	-0.02
3OzRMn	1	1	1969	1	2	3	3	2360.05	1	0	0	0	2506.74	2220.7	2839.03	0.97	-0.01
AOr6ZK	1	1	1959	1	2	3	3	2042.16	1	0	0	0	2406.53	1677.79	1610.73	1	0
phVxe2	1	1	1979	2	2	3	3	1634.05	1	0	0	0	1774.15	1486.58	2449.98	0.95	-0.02
P2fFhU	1	1	1976	1	2	3	3	1388.23	1	0	0	0	1394.65	1381.8	2649.97	0.92	-0.04
rR8CPJ	1	1	1958	2	2	3	3	1085.43	1	0	0	0	1141.55	1029.3	2301.35	0.95	-0.02
L2BZqQ	1	1	1968	2	2	3	3	1845.98	0.98	-0.01	0	-0.02	1837.5	1854.45	2031.5	0.93	-0.03
VQMEGG	1	1	1966	2	2	3	3	1407.55	0.98	-0.01	-0.02	0	1502.15	1312.95	1371.25	0.98	-0.01
3RoHTI	0	1	1950	2	2	3	3	1166.65	0.98	-0.01	-0.02	0	1084.8	1248.5	1211.33	0.88	-0.06
0vNQ3Q	0	1	1976	2	2	3	3	1103.33	0.98	-0.01	0	-0.02	1235.9	970.75	1519.9	1	0
55N9XR	1	2	1982	1	2	3	3	2018.7	0.97	-0.01	-0.02	0	1811.6	2225.8	2271.8	0.97	-0.01
vNz32o	0	1	1988	2	2	3	3	1559.98	0.95	-0.02	-0.05	0	1780	1339.95	2572.9	0.95	-0.02
HTwZf5	1	1	1955	2	2	3	3	1545.18	0.95	-0.02	-0.05	0	1768.35	1322	1100.5	0.92	-0.03
Um7GLu	1	1	1973	2	2	3	3	1489.78	0.95	-0.02	-0.02	-0.02	1691.65	1287.9	2084.63	0.86	-0.06
366J9x	1		1964	2	2	3	3	1420.75	0.95	-0.02	-0.02	-0.02	1388.05	1453.45	1501.75	0.83	-0.08
ZOZAS4	0		1983	2	2	3	3	1406.43	0.95	-0.02	-0.05	0	1477.05	1335.8	3645.08	0.93	-0.03
8OlCVv	1	1	1960	1	2	3	3	1303.33	0.95	-0.02	-0.02	-0.02	1436.6	1170.05	1284.28	0.8	-0.1
pjmiu4	0	1	1974	2	2	3	3	1181.03	0.95	-0.02	-0.05	0	1206.8	1155.25	1549.08	0.9	-0.05
kGKpdA		1	1979	2	2	3	3	1031.43	0.95	-0.02	-0.02	-0.02	1158.9	903.95	1316.65	0.92	-0.03
eKDLSR	0	1	1952	2	2	3	3	2019	0.93	-0.03	-0.07	0	2113.7	1924.3	2230.4	0.93	-0.03
jBgtog		1	1956	2	2	3	3	1585.55	0.93	-0.03	-0.05	-0.02	1513	1658.1	1705.38	0.79	-0.1
FTEtNU	0	1	1944	2	2	3	3	1419.38	0.93	-0.03	-0.07	0	1546.65	1292.1	2086.62	0.87	-0.06
OgIuOX	1	1	1968	1	2	3	3	1374.63	0.93	-0.03	-0.07	0	1235.15	1514.1	1876.67	0.89	-0.05
icn8QF		1	1975	2	2	3	3	1166.45	0.93	-0.03	-0.05	-0.02	1147.15	1185.75	1864.78	0.85	-0.07
TgqN2q	1	1	1957	2	2	3	3	1873.33	0.92	-0.03	-0.02	-0.05	1961.8	1784.85	2906.76	0.88	-0.06
73ijPM	0	1	1956	2	2	3	3	1845.73	0.92	-0.03	-0.07	0	1688.7	2002.75	1920.78	1	0
kwsDKq	1	1	1957	2	2	3	3	1904.28	0.92	-0.04	-0.05	-0.02	2119.45	1689.1	2449.25	0.86	-0.07
vxqHMu	1	1	1972	1	2	3	3	1717.15	0.9	-0.05	-0.07	-0.02	1978.8	1455.5	1896.48	0.93	-0.03
Gtv7CY	1	1	1977	2	2	3	3	1654.7	0.9	-0.05	-0.07	-0.02	1518.8	1790.6	1663.33	0.95	-0.02
nLnSQt	1	1	1987	2	2	3	3	1627.8	0.9	-0.05	-0.07	-0.02	1627.55	1628.05	1862.05	0.9	-0.05
OtQIPQ	1	1	1963	1	2	3	3	1829.18	0.9	-0.05	-0.02	-0.07	1962.4	1695.95	1974.38	0.95	-0.02
N21tO0	1	1	1963	2	2	3	3	1724.18	0.9	-0.05	-0.05	-0.05	1575.15	1873.2	2034.6	0.88	-0.06
xbTZLO	1	1	1980	1	2	3	3	1914.59	0.89	-0.05	-0.05	-0.05	1998	1835.35	2172.98	0.86	-0.06
PPOZcR	1	1	1949	2	2	3	3	1635.18	0.89	-0.05	-0.05	-0.05	1669.7	1600.65	1881.83	0.95	-0.02
wuRjpc	1	1	1934	2	2	3	3	1842.15	0.88	-0.06	-0.1	-0.02	1903.2	1781.1	1474.38	0.9	-0.05
nNLQOR	0	1	1952	1	2	3	3	1786.83	0.88	-0.06	-0.02	-0.1	1774.95	1798.7	2011.68	0.87	-0.06
yYsYPy	1	1	1951	2	2	3	3	1497.58	0.88	-0.06	-0.07	-0.05	1587.45	1407.7	2174.3	0.83	-0.08
4VNErg	1	2	1960	2	2	3	3	1253.63	0.88	-0.06	-0.12	0	1324.05	1183.2	1802.38	0.83	-0.08
C9vz1J	1	1	1978	1	2	3	3	1113.63	0.88	-0.06	-0.07	-0.05	1119.5	1107.75	2396.43	0.97	-0.01
BXXLpn	1	1	1961	2	2	3	3	1877.95	0.87	-0.06	-0.05	-0.08	1590.3	2180.74	1652.83	0.78	-0.11
cz0afE	0	1	1983	1	2	3	3	1734.35	0.87	-0.06	-0.14	0	1779.65	1689.05	3012.16	0.86	-0.06
23WeVU	1	1	1948	1	2	3	3	3159.89	0.86	-0.07	-0.12	-0.02	3191.42	3128.37	2780.03	0.88	-0.06
KB9GE0	1	1	1974	1	2	3	3	2188.78	0.85	-0.07	-0.02	-0.12	2258.6	2118.95	2229.21	0.76	-0.12
HsamwH	1	1	1965	2	2	3	3	2670.62	0.85	-0.07	-0.03	-0.12	2726.6	2611.68	2719.85	0.91	-0.04
zf6Ohi	1	1	1981	1	2	3	3	2368.13	0.84	-0.07	-0.07	-0.07	2183.42	2543.6	2518.68	0.92	-0.04
Wdegtn	1	1	1979	1	2	3	3	2175.64	0.84	-0.07	-0.1	-0.05	2007.15	2353	2571.67	0.89	-0.05
Vn1MYC	1	1	1955	2	2	3	3	2702.1	0.83	-0.08	-0.1	-0.07	2591.3	2812.9	2751.98	0.79	-0.1
0hcN2t	0	1	1952	2	2	3	3	1828.95	0.83	-0.08	-0.15	-0.02	1794.9	1863	2606.28	0.68	-0.17
BGoRLM	1	1	1965	2	2	3	3	1725.68	0.83	-0.08	-0.12	-0.05	1774.15	1677.2	2633.1	0.84	-0.07
2XJVSn	1	1	1950	2	2	3	3	1487.83	0.82	-0.09	-0.15	-0.02	1392.25	1583.4	2457.35	0.68	-0.17
5PNChR	1	1	1959	2	2	3	3	2069.26	0.79	-0.1	-0.08	-0.12	2163.32	1979.9	2017.93	0.9	-0.05
gtRONl	0	1	1921	1	2	3	3	3097.65	0.76	-0.12	-0.18	-0.06	3113.89	3080.5	2465.73	0.67	-0.18
XbXMsW	1	2	1962	2	2	3	3	2937.29	0.76	-0.12	-0.08	-0.18	3176.65	2671.33	2942.3	0.9	-0.05
I9N7nV	1	1	1937	2	2	3	3	1899.43	0.75	-0.12	-0.12	-0.12	1943.65	1855.2	2740.03	0.72	-0.14
zWjgHS	1	1	1984	2	2	3	3	2329.05	0.72	-0.14	-0.2	-0.08	2048.63	2595.45	2212.85	0.92	-0.04
UnY4Jp		1	1951	2	2	3	3	1848.03	0.7	-0.15	-0.22	-0.1	1728.95	1967.1	2257.82	0.82	-0.09
T5OKmN	1	1	1984	1	2	3	3	1401.18	0.65	-0.19	-0.35	-0.07	1484.3	1318.05	1926.03	0.95	-0.02
RRWyq9	1	1	1960	2	2	3	3	2511.2	0.64	-0.19	-0.26	-0.13	2465.35	2557.05	2597.08	0.78	-0.11
uyNVkD	1	1	1965	2	2	3	3	1823	0.64	-0.19	-0.32	-0.1	1794.7	1851.3	2151.55	0.85	-0.07
uYCmmU	1	1	1957	2	2	3	3	2698.2	0.51	-0.29	-0.26	-0.32	2703.4	2693	2530.43	0.69	-0.16
cLO0vS	1	1	1991	1	2	3	3	1416.28	0.49	-0.31	-0.26	-0.38	1423.4	1409.15	1825.4	0.38	-0.41
Er38aV	1	2	1953	2	2	3	3	1862.13	0.47	-0.32	-0.38	-0.28	2001.55	1722.7	1950.84	0.83	-0.08
r4Zjof	0	1	1992	1	2	3	3	1004.93	0.4	-0.4	-0.35	-0.46	1029.5	980.35	1912.63	0.78	-0.11
KpdcZW	1	1	1949	2	2	3	3	1750.46	0.14	-0.87	-0.68	-1.26	1748.55	1752.47	2008.78	0.64	-0.19
OlBtnN	1	1	1960	2	2	3	3	1935.08	0.08	-1.11	-0.82		2085.05	1785.1	3350.56	1	0
WGVDSa	1	1	1950	2	1	3		1741.1	0.82	-0.09	-0.1	-0.07	1595.37	1879.55	1785.2	0.88	-0.06
VtPXf8	1	1	1976	2	1	3	0	1159.4	1	0	0	0	1298.45	1020.35	2208.6	0.92	-0.03
u6APxt	0	1	1986	2	1	3	0	1524.13	0.98	-0.01	-0.02	0	1707.45	1340.8	1905.8	0.87	-0.06
5Cr6SU	1	1	1957	2	1	3	0	1103.4	0.98	-0.01	-0.02	0	1108.75	1098.05	1001.5	0.88	-0.06
uD2MLt	1	1	1982	1	1	3	0	1418.1	0.95	-0.02	-0.05	0	1429.25	1406.95	2053.23	0.74	-0.13
brv82q	0	1	1959	1	1	3	0	1381.78	0.95	-0.02	-0.02	-0.02	1527.4	1236.15	2163.2	1	0
OSFg4d	1	1	1959	1	1	3	0	1292.73	0.95	-0.02	-0.05	0	1394.45	1191	1526.03	0.92	-0.03
JFNHSr	1	3	1972	1	1	3	0	939.48	0.95	-0.02	-0.02	-0.02	914.8	964.15	1421.79	0.71	-0.15
elIza7	1	1	1973	2	1	3	0	2485.67	0.95	-0.02	-0.02	-0.02	2609.26	2368.25	2443.95	0.86	-0.06
PeEu0R	1	1	1990	1	1	3	0	1862.78	0.93	-0.03	-0.02	-0.05	1998.2	1727.35	2529.2	0.97	-0.01
2gJfsv	1	1	1966	1	1	3	0	1519.5	0.93	-0.03	-0.05	-0.02	1506.75	1532.25	1076.25	0.98	-0.01
eIMPkO	0	1	1971	1	1	3	0	1562.5	0.92	-0.04	-0.05	-0.02	1668.8	1456.2	1960.62	0.97	-0.01
yjMS41	0	1	1981	2	1	3	0	2166	0.92	-0.04	-0.02	-0.05	2270.55	2055.95	1808.45	0.92	-0.03
bkPQHI	0	1	1954	2	1	3	0	1652.1	0.9	-0.05	-0.02	-0.07	1707.7	1596.5	1683.33	0.73	-0.14
MbpqZc	1	1	1980	1	1	3	0	1468.85	0.9	-0.05	-0.1	0	1460.6	1477.1	2223.53	0.87	-0.06
CZiwab	0	1	1979	2	1	3	0	1263.75	0.9	-0.05	-0.05	-0.05	1322.05	1205.45	1688.3	0.98	-0.01
LTQg7Y	1	1	1973	1	1	3	0	2073.92	0.89	-0.05	-0.05	-0.05	2157.25	1986.21	2785.49	1	0
HHdJEg		1	1974	2	1	3	0	2289.3	0.89	-0.05	-0.1	0	2062.8	2515.8	2926.46	0.82	-0.08
uPlY0x	1	1	1969	2	1	3	0	2275.65	0.89	-0.05	-0.05	-0.05	2245.2	2306.1	2217.35	0.9	-0.05
UWJhl4	0	1	1988	1	1	3	0	1281.75	0.88	-0.06	-0.07	-0.05	1325.65	1237.85	1820.48	0.95	-0.02
uqdilk	1	1	1981	1	1	3	0	721.98	0.85	-0.07	-0.05	-0.1	726.8	717.15	1407	0.95	-0.02
m5GlVJ	1	2	1954	1	1	3	0	1833.55	0.82	-0.09	-0.13	-0.05	1977.7	1689.4	1478.8	0.98	-0.01
782H3w	1	2	1975	1	1	3	0	2290.9	0.79	-0.1	-0.13	-0.07	2411.2	2170.6	2449.1	0.63	-0.2
ZYic7i	1	1	1954	2	1	3	0	3658.42	0.76	-0.12	-0.08	-0.16	3745.25	3561.94	3940.18	0.78	-0.11
4gZ8ss		1	1969	2	1	3	0	1501.35	0.68	-0.17	-0.15	-0.19	1535.65	1467.05	1999.9	0.79	-0.1
1YZIFB	1	1	1973	1	1	3	0	1284.03	0.67	-0.18	-0.12	-0.24	1180.35	1387.7	2951.85	0.83	-0.08
iCsf2V	0	1	1967	2		3		1513.58	0.95	-0.02	-0.05	0	1507.7	1519.45	1265.68	0.9	-0.05
T1pZu6	1	1	1988	1		3		1873.48	0.93	-0.03	-0.07	0	1853.35	1893.6	2584.47	0.84	-0.08
Jo9tjq	1	1	1990	1	2		3	2432.63	0.74	-0.13	-0.12	-0.14	2162.1	2703.15	2585.51	0.89	-0.05
598GTy	0	1	1988	0	1			1143.75	0.78	-0.11	-0.15	-0.07	1224.4	1063.1	1316.7	0.93	-0.03
QJofve	0	1	1967	0	1		0	1382.78	1	0	0	0	1541.25	1224.3	1883.48	0.98	-0.01
BxRxmJ	0	1	1981	0	1		0	1411.33	0.95	-0.02	-0.05	0	1202.05	1620.6	1559.88	0.75	-0.12
NquQl9	0	1	1966	2	2		3	1818.21	0.72	-0.14	-0.12	-0.15	2078.11	1584.3	2273.78	0.82	-0.09
GMb13I	1	1	1960	2	2		3	1875.83	0.68	-0.17	-0.05	-0.35	1903.25	1848.4	2164.03	0.55	-0.26
Fap6Mn	0	1	1977	1	2	2	2	1243.68	1	0	0	0	1380.4	1106.95	1441.7	1	0
ap6HZc	0	1	1977	2	2	2	2	1171.5	1	0	0	0	1307.55	1035.45	1308.9	0.98	-0.01
gY3yBq	1	1	1959	2	2	2	2	1610.75	0.98	-0.01	-0.02	0	1852.25	1369.25	2451.26	0.81	-0.09
vHZK3N	1	1	1988	1	2	2	2	1587.68	0.98	-0.01	-0.02	0	1403.8	1771.55	2016.03	0.85	-0.07
oWwRyx	1	1	1980	2	2	2	2	1583.38	0.98	-0.01	-0.02	0	1519.1	1647.65	2368.31	0.89	-0.05
r7l61b	1	1	1976	2	2	2	2	1397.7	0.98	-0.01	-0.02	0	1516.2	1279.2	2089.45	0.97	-0.01
WbJr3k	1		1966	2	2	2	2	1124.95	0.98	-0.01	0	-0.02	1253.85	996.05	1076.25	1	0
v0dXOa		1	1978	2	2	2	2	1744.23	0.95	-0.02	-0.05	0	1715.8	1772.65	1875.62	0.92	-0.04
MeO9BZ	1	1	1959	1	2	2	2	1380.3	0.95	-0.02	-0.02	-0.02	1530.55	1230.05	2254.67	0.95	-0.02
qqySfm	1	1	1958	1	2	2	2	1354.7	0.95	-0.02	0	-0.05	1338.3	1371.1	960.23	1	0
HxPopC	0	1	1978	1	2	2	2	1155.85	0.95	-0.02	-0.05	0	1190.65	1121.05	1321.73	0.95	-0.02
yt8M1x	1	1	1952	1	2	2	2	1954.4	0.95	-0.02	-0.05	0	2207.35	1701.45	2036.95	0.85	-0.07
PmjYMR	1	1	1956	2	2	2	2	1890.78	0.95	-0.02	-0.02	-0.02	1896.65	1884.9	2216.65	0.82	-0.09
Y2nXwn	1	2	1966	2	2	2	2	2597.46	0.95	-0.02	-0.05	0	2574.84	2618.95	2269.4	0.98	-0.01
SAu5iC	1	1	1972	2	2	2	2	2200.23	0.93	-0.03	-0.02	-0.05	2180.05	2220.4	2780.35	0.78	-0.11
YKtczv	1	1	1978	2	2	2	2	1843.65	0.93	-0.03	-0.05	-0.02	1731.85	1955.45	2079.68	0.9	-0.05
0Ec0FD	1	1	1961	2	2	2	2	1485.25	0.93	-0.03	-0.05	-0.02	1529.05	1441.45	1832.72	0.82	-0.09
x0EblD	1	1	1962	1	2	2	2	1059.78	0.93	-0.03	-0.07	0	979.65	1139.9	1452.28	0.78	-0.11
Fvavml	1	1	1984	1	2	2	2	2719.6	0.92	-0.04	-0.07	0	2566.1	2873.1	2641.82	0.97	-0.01
SoXmIU	0	1	1957	2	2	2	2	1816.48	0.9	-0.05	-0.1	0	1791.5	1841.45	2599.25	0.93	-0.03
iCQXMG	1	1	1968	2	2	2	2	1773.7	0.9	-0.05	-0.1	0	1794.55	1752.85	2252.98	0.87	-0.06
w864CL	0	1	1952	2	2	2	2	1294.13	0.9	-0.05	-0.1	0	1213.8	1374.45	1936.6	0.93	-0.03
0j7AtQ	1	1	1962	2	2	2	2	1772.13	0.89	-0.05	-0.05	-0.05	1729.1	1815.15	2860.15	0.71	-0.15
BzyBaa	1	3	1982	1	2	2	2	1847.6	0.88	-0.06	-0.1	-0.02	1872.8	1822.4	2463.13	0.66	-0.18
fEOrgp	1	2	1947	1	2	2	2	2701.5	0.84	-0.08	-0.13	-0.02	2421.55	2981.45	3619.33	0.89	-0.05
AHCY0y		1	1977	1	2	2	2	2131.15	0.82	-0.09	-0.07	-0.1	2080.95	2181.35	1942.97	0.84	-0.07
CiSXOB	1	1	1955	1	2	2	2	1524.97	0.82	-0.09	-0.12	-0.05	1548.3	1500.42	2200.74	0.74	-0.13
XP3zxT	0	1	1961	2	2	2	2	1625.38	0.81	-0.09	-0.1	-0.08	1508.4	1748.53	2237.5	0.85	-0.07
pWoz72		1	1948	2	2	2	2	1657.75	0.8	-0.1	-0.05	-0.15	1588.2	1727.3	1559.35	0.75	-0.12
f2Y23G	1	1	1957	2	2	2	2	2376.08	0.79	-0.1	-0.1	-0.1	2304.15	2448	2093.26	0.75	-0.12
gek8Yj	1	1	1955	2	2	2	2	2224.7	0.78	-0.11	-0.19	-0.05	2237.85	2211.55	1947.33	0.63	-0.2
Q6fuHD	0	1	1963	2	2	2	2	2481.44	0.66	-0.18	-0.16	-0.2	2537.45	2422.47	2158.9	0.84	-0.07
kwtzNr	1	1	1982	2	2	2	1	1674.55	0.95	-0.02	-0.05	0	1671.25	1677.85	1538.78	0.9	-0.05
mnSlVW	0	1	1980	2	2	2	1	953.1	0.93	-0.03	-0.05	-0.02	935.95	970.25	2666.43	0.76	-0.12
k9MD7p	1	1	1981	2	2	2	3	1492.58	0.98	-0.01	-0.02	0	1520.85	1464.3	1516.75	0.83	-0.08
ad7dqC		1	1977	2	2	2	3	1369.95	0.98	-0.01	-0.02	0	1489.8	1250.1	1384.58	1	0
5PwI5e	1	1	1976	2	2	2	3	1237.13	0.98	-0.01	-0.02	0	1179.05	1295.2	1613.08	0.93	-0.03
miV3YX		1	1980	2	2	2	3	1381.13	0.95	-0.02	-0.05	0	1243.4	1518.85	1888.68	0.85	-0.07
yPEApm	1	1	1979	2	2	2	3	1143.7	0.95	-0.02	-0.05	0	1092.6	1194.8	2040.15	0.88	-0.06
8uDP5p	1	1	1965	1	2	2	3	986.3	0.95	-0.02	-0.05	0	1126.5	846.1	991.05	1	0
vr49LC	1	1	1975	1	2	2	3	918.5	0.95	-0.02	-0.05	0	919	918	1486.7	1	0
eDhcgF	1	1	1981	1	2	2	3	2018	0.95	-0.02	-0.02	-0.02	1801	2224.15	2239.79	1	0
eNloxQ		1	1951	2	2	2	3	1596.25	0.93	-0.03	-0.02	-0.05	1529.7	1662.8	1525.18	0.9	-0.05
ORrGOk	0	1	1980	1	2	2	3	810.35	0.93	-0.03	-0.07	0	871.45	749.25	1175.8	0.83	-0.08
DPz25K	1	1	1971	2	2	2	3	1798.5	0.92	-0.04	-0.05	-0.02	1624.25	1972.75	1591.9	0.93	-0.03
MIdrBU	1	1	1983	1	2	2	3	1178.18	0.9	-0.05	-0.1	0	1150.85	1205.5	1830.75	0.85	-0.07
nmAJDj	1		1955	2	2	2	3	970.28	0.9	-0.05	-0.1	0	1057.2	883.35	973.8	0.88	-0.06
vSnksR	1	1	1972	1	2	2	3	1806.18	0.89	-0.05	-0.07	-0.02	1670.47	1935.1	2074.39	0.94	-0.02
4o9qXG	1	3	1949	2	2	2	3	1804.58	0.88	-0.06	-0.1	-0.02	1792.6	1816.55	2365.95	0.88	-0.06
t9ObSm	1	2	1955	2	2	2	3	1226.23	0.88	-0.06	-0.05	-0.07	1192.15	1260.3	2621.9	0.89	-0.05
bVMqHG	1	1	1962	2	2	2	3	2668.64	0.87	-0.06	-0.05	-0.08	2695.9	2639.95	2140.62	0.97	-0.01
80LJVJ	1	1	1945	2	2	2	3	1781.05	0.85	-0.07	-0.1	-0.05	1701.55	1860.55	1164.93	0.95	-0.02
ezk3c0	1	1	1964	2	2	2	3	1663.8	0.67	-0.18	-0.24	-0.12	1854.8	1472.8	2135.5	0.93	-0.03
3nOa48	1	1	1948	2	2	2	3	2104.26	0.63	-0.2	-0.22	-0.18	2082.05	2127.63	1856.15	0.74	-0.13
P8vev6	0	1	1963	1	2	2	3	2942.74	0.5	-0.3	-0.41	-0.22	3152.11	2743.85	2890	0.78	-0.11
j3MMFy	1	2	1965	2	1	2		1609.98	0.88	-0.06	-0.1	-0.02	1452.7	1767.25	1711.78	0.79	-0.1
27XQYo	1	1	1986	2	1	2		1300.83	0.9	-0.05	-0.02	-0.07	1318	1283.65	1497.68	0.8	-0.1
yFcHAb	0	1	1976	1	1	2	0	1297.63	1	0	0	0	1284.25	1311	1928.4	0.98	-0.01
bCxGqF	1	3	1983	2	1	2	0	1271.8	1	0	0	0	1446.85	1096.75	2069.25	0.93	-0.03
coaRu0	1	1	1983	1	1	2	0	1876.78	0.98	-0.01	-0.02	0	2142.7	1610.85	2164.49	1	0
Ql4Nff	0	1	1965	2	1	2	0	1484.85	0.98	-0.01	-0.02	0	1519.2	1450.5	2420.88	0.95	-0.02
jc6uKe	1	1	1950	2	1	2	0	1401.98	0.95	-0.02	-0.05	0	1428.95	1375	1617.25	0.95	-0.02
Y327P9	1	1	1983	2	1	2	0	1109.7	0.95	-0.02	-0.05	0	1144.95	1074.45	1343.41	0.87	-0.06
QdgtZV	1	1	1984	2	1	2	0	1065.93	0.95	-0.02	-0.02	-0.02	1075.5	1056.35	1491.75	0.95	-0.02
MW9rTc	1	2	1972	2	1	2	0	1608.9	0.93	-0.03	-0.07	0	1712.75	1505.05	2067.6	0.97	-0.01
eSCh7l	1	1	1981	2	1	2	0	1154.9	0.93	-0.03	-0.05	-0.02	1070.75	1239.05	2454.1	0.83	-0.08
hrm0Y4	0	1	1979	1	1	2	0	1311.35	0.9	-0.05	-0.07	-0.02	1180.75	1441.95	1333.98	0.93	-0.03
A0ykXc	0	1	1967	1	1	2	0	1738.2	0.88	-0.06	-0.1	-0.02	2026.15	1450.25	2794.72	0.74	-0.13
WiVN8g	0	1	1920	2	1	2	0	2785.8	0.72	-0.14	-0.15	-0.13	2822.15	2749.45	2778.3	0.49	-0.31
yY30h5	1	1	1969	2		2		1481.48	0.88	-0.06	-0.07	-0.05	1560.8	1402.15	2446.39	0.86	-0.07
9sh1nG	1	1	1987	1		2		1702.78	0.95	-0.02	-0.05	0	1679.4	1726.15	1596.7	0.98	-0.01
TmdrmA	0	1	1972	2		2		904.03	1	0	0	0	901.5	906.55	992.9	0.98	-0.01
mSeHVO	0	1	1979	1		2		1353.85	0.9	-0.05	-0.07	-0.02	1390.2	1317.5	1234.88	0.98	-0.01
QeMJC9	1	1	1966	2	2		3	2594.9	0.37	-0.43	-0.43	-0.43	3100.65	2089.15	2991.8	0.84	-0.08
YQCX60	1	2	1954	2	2	1	2	1460.9	0.98	-0.01	0	-0.02	1391	1530.8	1265.46	0.97	-0.01
Y2LYFt	1	3	1962	2	2	1	2	2882	0.97	-0.01	-0.03	0	2876.16	2887.84	2549.14	0.85	-0.07
ItC15C	1	1	1981	1	2	1	2	1386.15	0.9	-0.05	-0.07	-0.02	1311.35	1460.95	1249.73	0.95	-0.02
CGhJDW	1	1	1960	2	2	1	2	1838.1	0.89	-0.05	-0.1	0	1747.42	1924.25	2038.38	0.77	-0.11
E62PjX	1	2	1960	2	2	1	2	1622.03	0.88	-0.06	-0.1	-0.02	1529.95	1714.1	1376.73	0.9	-0.05
NgpADq	1		1953	1	2	1	2	1616.58	0.75	-0.12	-0.07	-0.19	1745.35	1487.8	2123.83	0.73	-0.14
I07P4G	0	1	1961	2	2	1	1	1886.73	1	0	0	0	2168.75	1604.7	1523.48	0.93	-0.03
YnPgl3	1	1	1974	2	2	1	1	1500.08	1	0	0	0	1641.15	1359	1490.8	0.92	-0.03
CRrMwz	1	1	1953	2	2	1	1	1808.88	0.98	-0.01	-0.02	0	2036.15	1581.6	2114.05	0.77	-0.11
7l5W9T	1	1	1974	2	2	1	1	1753.18	0.98	-0.01	0	-0.02	1982.75	1523.6	2255.5	0.82	-0.09
rurh9E	1	1	1979	2	2	1	1	1365.28	0.98	-0.01	0	-0.02	1454.65	1275.9	2622.05	0.94	-0.03
KlwY0l	1	1	1971	1	2	1	1	1287.05	0.98	-0.01	-0.02	0	1235.1	1339	1269.9	1	0
pmt5sK	0	1	1983	2	2	1	1	1483.9	0.97	-0.01	-0.02	0	1440.2	1527.6	1915.8	0.97	-0.01
LmSEQ5	1	1	1973	1	2	1	1	959.35	0.95	-0.02	-0.02	-0.02	938.3	980.4	1199.43	0.9	-0.05
lKdW5V	1	1	1958	2	2	1	1	1579.38	0.95	-0.02	-0.05	0	1642.5	1516.25	2345.82	0.89	-0.05
3Jgojj	1	2	1979	2	2	1	1	1419.69	0.95	-0.02	-0.02	-0.02	1486.25	1349.63	2182.32	0.84	-0.08
IDadWX	0	1	1947	2	2	1	1	2266.38	0.95	-0.02	-0.05	0	2288.6	2243	2616.93	0.88	-0.06
0DPgjm	1	1	1957	2	2	1	1	1472.23	0.93	-0.03	-0.02	-0.05	1579.05	1365.4	1516.83	0.92	-0.03
UHwybM	1	1	1955	2	2	1	1	1317.2	0.93	-0.03	-0.02	-0.05	1363.2	1271.2	1353.15	1	0
xRgSgc	1	1	1954	1	2	1	1	1219.25	0.93	-0.03	-0.05	-0.02	1344.2	1094.3	2200.82	0.83	-0.08
FotZe9	1	1	1976	2	2	1	1	824.48	0.93	-0.03	-0.02	-0.05	763.2	885.75	1574.9	0.97	-0.01
6XhkWA	1	1	1966	1	2	1	1	2178.15	0.92	-0.03	-0.05	-0.02	2384.4	1971.9	2170.33	0.95	-0.02
I9rfLC	0	2	1975	1	2	1	1	2161.98	0.92	-0.03	-0.02	-0.05	2125.9	2198.05	2529.2	0.66	-0.18
wVsUrE	1	1	1960	2	2	1	1	2156.23	0.92	-0.03	-0.02	-0.05	2445.65	1866.8	1527.46	0.97	-0.01
o3iasd	1	1	1979	1	2	1	1	1811.55	0.92	-0.03	-0.02	-0.05	1720.75	1902.35	2653.58	0.84	-0.07
mtspmB	1	1	1975	1	2	1	1	1847.18	0.9	-0.05	-0.07	-0.02	1841.35	1853	2273.35	0.9	-0.05
e2h36A	1	1	1974	2	2	1	1	1125	0.9	-0.05	-0.02	-0.07	1105.45	1144.55	1353.13	0.95	-0.02
W0FjmC	1	1	1940	2	2	1	1	3038.28	0.89	-0.05	-0.03	-0.08	3029.65	3046.9	3931.38	0.91	-0.04
KskcFY	1	1	1971	2	2	1	1	2212.53	0.88	-0.06	-0.1	-0.02	2214.65	2210.4	2611.78	1	0
KSSLTm	1	1	1954	2	2	1	1	2569.5	0.87	-0.06	-0.14	0	3023.6	2115.4	1781.15	0.77	-0.11
QuJmS7	1	1	1968	2	2	1	1	2001.8	0.85	-0.07	-0.1	-0.05	1945.65	2057.95	2172.13	0.79	-0.1
TuDldS	1	1	1974	1	2	1	1	1732.48	0.85	-0.07	-0.07	-0.07	1792.45	1672.5	1980.5	0.82	-0.09
YIekdC	1	1	1961	1	2	1	1	2497.25	0.85	-0.07	-0.05	-0.1	2637.3	2357.2	2001.55	0.92	-0.04
SVmFHl	1	1	1979	1	2	1	1	2522.15	0.84	-0.07	-0.1	-0.05	2606.75	2433.11	3298.18	0.86	-0.06
az1pFG	1	1	1957	1	2	1	1	1932.26	0.84	-0.07	-0.1	-0.05	1736.8	2138	2467.69	0.89	-0.05
ul3whv		1	1959	1	2	1	1	1663.36	0.82	-0.09	-0.05	-0.14	1506.85	1828.11	1894.88	0.59	-0.23
ALrcpp	1	3	1951	2	2	1	1	1698.35	0.78	-0.11	-0.12	-0.1	1877.15	1519.55	3133.49	0.76	-0.12
uhd0Vm	0	1	1959	2	2	1	1	2487.36	0.71	-0.15	-0.2	-0.1	2397.21	2573	1916.42	0.58	-0.23
W6PRw6	1	1	1952	2	2	1	1	3467.08	0.53	-0.27	-0.28	-0.27	3341.4	3599.37	2864.26	0.71	-0.15
9Tqvds	1	1	1962	2	2	1	1	1849.24	0.51	-0.29	-0.35	-0.24	1870.05	1828.42	1857.98	0.7	-0.15
S10j5i	1	1	1967	1	2	1	1	2179.38	0.43	-0.37	-0.4	-0.35	2375.75	1983	2251.1	0.54	-0.27
Wxh6e9	1	1	1974	1	2	1	3	1253.05	1	0	0	0	1274.15	1231.95	2090.55	0.98	-0.01
Lev3d0	0	2	1978	1	2	1	3	2099.25	0.98	-0.01	0	-0.02	2182.05	2016.45	3192.69	0.89	-0.05
taFvfb	1	1	1974	1	2	1	3	1525.9	0.98	-0.01	-0.02	0	1492.1	1559.7	2467.18	0.85	-0.07
msoyMh	1	1	1983	2	2	1	3	1158.2	0.98	-0.01	-0.02	0	1384.65	931.75	1444.18	0.98	-0.01
MjY6vZ	0	1	1952	2	2	1	3	1430.9	0.97	-0.01	-0.02	0	1546.45	1315.35	1336.23	1	0
02WDLq	0	1	1977	1	2	1	3	1584.25	0.95	-0.02	-0.02	-0.02	1488.35	1680.15	1641.45	0.98	-0.01
n6j62m		1	1980	2	2	1	3	1567.75	0.95	-0.02	-0.02	-0.02	1658.5	1477	2304.34	0.97	-0.01
9CCDUL	1	1	1968	1	2	1	3	2211.53	0.92	-0.04	-0.02	-0.05	2323.7	2099.35	2533.1	0.78	-0.11
iZIiHa	1	1	1952	2	2	1	3	2113.74	0.92	-0.04	-0.05	-0.02	2193.26	2038.2	2801.24	0.75	-0.12
TqfcdZ	1	1	1980	1	2	1	3	1689.88	0.9	-0.05	-0.07	-0.02	1581.4	1798.35	2092.23	0.95	-0.02
tyJjCk	1	2	1950	2	2	1	3	1493.03	0.9	-0.05	-0.02	-0.07	1369.7	1616.35	1275.18	0.93	-0.03
3lyBRx	0	1	1980	1	2	1	3	1279.03	0.9	-0.05	-0.07	-0.02	1314.2	1243.85	1721.43	1	0
dwkDDd	1	1	1946	2	2	1	3	2256.03	0.9	-0.05	-0.1	0	2189.9	2322.15	3174.23	0.37	-0.43
UinwRC	1	1	1981	1	2	1	3	1126.9	0.88	-0.06	-0.07	-0.05	1076.8	1177	1268.73	0.98	-0.01
viEcSj	1	1	1962	2	2	1	3	2201.08	0.85	-0.07	-0.05	-0.1	2254.65	2147.5	1944.08	0.83	-0.08
bxu87j	1	2	1962	1	2	1	3	993.18	0.85	-0.07	-0.07	-0.07	1045.05	943.9	1704.7	0.93	-0.03
2pM2zV	1	1	1977	1	2	1	3	1535	0.83	-0.08	-0.1	-0.07	1625.4	1444.6	2286.6	0.93	-0.03
YZY8H0	1	2	1973	1	2	1	3	1661.2	0.75	-0.12	-0.1	-0.15	1790.3	1532.1	2447.73	0.92	-0.04
B0Scla	1	1	1962	2	2	1	3	1433.9	0.7	-0.15	-0.22	-0.1	1338.45	1529.35	1515.75	0.83	-0.08
4E8vrI	1	2	1962	2	2	1	3	2279.18	0.68	-0.16	-0.13	-0.2	2295.2	2262.32	1597.13	0.88	-0.06
nd4yII	1	3	1969	2	2	1	3	2080.44	0.68	-0.16	-0.19	-0.14	2130.8	2027.42	2703.89	0.95	-0.02
DUmeBG	0	1	1948	1	2	1	3	1946.5	0.53	-0.28	-0.3	-0.26	1924.45	1968.55	2254.85	0.63	-0.2
lk3sVz	1	1	1987	1	2	1	3	1570.55	0.53	-0.28	-0.3	-0.26	1454.05	1687.05	1543.94	0.69	-0.16
v9MZqB	1	1	1974	1	1	1	0	1184.35	1	0	0	0	1198.8	1169.9	1201.23	1	0
EBO7FI		1	1951	1	1	1	0	1391.53	0.98	-0.01	0	-0.02	1517.2	1265.85	1503.43	0.88	-0.06
THQjRi	1	1	1975	1	1	1	0	1286.73	0.98	-0.01	-0.02	0	1220.3	1353.15	1625.38	0.95	-0.02
LXoZlQ	1	1	1962	1	1	1	0	1169.43	0.98	-0.01	-0.02	0	1269.85	1069	1148.9	0.88	-0.06
p3mAKp	1	1	1986	2	1	1	0	873.93	0.98	-0.01	-0.02	0	900.8	847.05	1167.83	0.85	-0.07
fnXB57	0	1	1978	2	1	1	0	1315.5	0.93	-0.03	-0.05	-0.02	1383.75	1247.25	2152.51	0.89	-0.05
rKqNan	1	1	1980	1	1	1	0	979.95	0.93	-0.03	-0.02	-0.05	975.75	984.15	1569.25	0.9	-0.05
BR7OsN	1	1	1988	1	1	1	0	1780.1	0.92	-0.04	-0.05	-0.02	1811.05	1749.15	2948.1	0.91	-0.04
hUXEuw	1	1	1973	1	1	1	0	1936.4	0.88	-0.06	-0.07	-0.05	2076.85	1795.95	1939.55	0.78	-0.11
G4WZhH	1	1	1987	1	1	1	0	1293.1	0.87	-0.06	-0.08	-0.05	1501	1085.2	1730.15	0.9	-0.05
v5o8bY	1	1	1976	1	1	1	0	1755.55	0.85	-0.07	-0.07	-0.07	1757.55	1753.55	1677.45	0.8	-0.1
pzhJ25	1	1	1965	1	1	1	0	2858.4	0.71	-0.15	-0.12	-0.18	2893.6	2823.2	2423.36	0.91	-0.04
7UZBr3		1	1984	2		1		1050.2	0.98	-0.01	-0.02	0	1140.6	959.8	2011.5	0.95	-0.02
ofai2j	1	1	1952	1		1		1887.05	0.93	-0.03	-0.02	-0.05	1901.6	1872.5	2396.62	0.81	-0.09
wbtziz	0	1	1968	2		1		2113.73	0.75	-0.12	-0.12	-0.12	2404.65	1822.8	2492.38	0.85	-0.07
t7lKJm	0	1	1978	0	1		0	1283.25	0.95	-0.02	-0.05	0	1153.75	1412.75	1614.3	0.88	-0.06
OdWYJI	1	3	1952	1	2		1	1333.6	0.88	-0.06	-0.07	-0.05	1218.8	1448.4	1447.9	0.83	-0.08
dyPLfo	0	1	1979	2	2		1	1618.73	0.9	-0.05	-0.05	-0.05	1581.8	1655.65	2285.97	0.76	-0.12
4FO3hX	0	1	1958	2	2		3	1479.93	0.85	-0.07	-0.12	-0.02	1436.55	1523.3	1728.5	0.85	-0.07
AZT8e7	1	1	1947	2	2		3	1087.38	0.8	-0.1	-0.05	-0.15	1022.15	1152.6	914.53	0.93	-0.03
4SmWUe	0	1	1956	2	2		3	1969.03	0.73	-0.14	-0.07	-0.22	1974.8	1963.25	1822.98	0.95	-0.02
SI16Ut	1	1	1982	2	2	0	2	1861.93	1	0	0	0	2062.95	1660.9	2490.85	0.78	-0.11
lOTsbl	1	1	1982	2	2	0	2	1288.2	0.08	-1.12	-1	-1.3	1205.15	1371.25	2934.21	0.67	-0.18
GorP19	0	1	1977	2	2	0	1	1586.18	1	0	0	0	1520.25	1652.1	2307.82	0.97	-0.01
T8HHOY	1	2	1954	1	2	0	1	1542.58	0.9	-0.05	-0.07	-0.02	1616.5	1468.65	2507.78	0.58	-0.24
PDDQG4	1		1961	2	2	0	3	2157.28	0.92	-0.03	-0.05	-0.02	2171.7	2142.85	2355.58	1	0
crJqzW	0	1	1970	2	2	0	3	1448.43	0.9	-0.05	-0.07	-0.02	1712.8	1184.05	1802.55	0.98	-0.01
J6KPaJ	1	2	1947	2	2	0	3	2419.15	0.8	-0.1	-0.12	-0.07	2352.75	2485.55	2683.53	0.9	-0.05
VohLuf	0	2	1965	0	1	0		1531.7	0.93	-0.03	-0.05	-0.02	1520.9	1542.5	2227.73	0.75	-0.12
oAgcOR	1	1	1985	0	1	0		1369.93	0.88	-0.06	-0.05	-0.07	1211.85	1528	1731.23	0.93	-0.03
3VtMDN	1	1	1993	0	1	0		2130.11	0.83	-0.08	-0.07	-0.08	2238.65	2009.5	2374.38	0.87	-0.06
ARpqLG	1	1	1964	0	1	0		2613.5	1	0	0	0	1327	3900	2660.51	0.79	-0.1
VyWHMd	1	1	1978	0	1	0		1459.75	1	0	0	0	1717.25	1202.25	1700.58	0.95	-0.02
lsE7wq	1	1	1973	0	1	0		1369.68	0.98	-0.01	-0.02	0	1267.65	1471.7	1497.58	1	0
qlBZm9	0	1	1962	0	1	0		1333.78	0.98	-0.01	-0.02	0	1455.25	1212.3	1127.48	0.98	-0.01
0PU9Tw		2	1966	0	1	0	0	2542.83	1	0	0	0	2678.5	2407.15	2668.64	1	0
SUuYbm	1	2	1963	0	1	0	0	2499.32	1	0	0	0	2535	2463.63	1609.93	0.98	-0.01
DZR2A5	1	1	1964	0	1	0	0	2470.98	1	0	0	0	2430.65	2511.3	3286.41	0.92	-0.04
31mqPe	0	1	1978	0	1	0	0	2231.48	1	0	0	0	2325.25	2137.7	2408.93	0.9	-0.05
AO634V	1	1	1975	0	1	0	0	2165.3	1	0	0	0	2007.85	2322.75	3617.62	0.87	-0.06
d8kBaO	0	1	1970	0	1	0	0	2136.16	1	0	0	0	2139.16	2133.16	2455.18	0.86	-0.06
mFbPER	1	1	1980	0	1	0	0	2118.88	1	0	0	0	2245.2	1992.55	3435.05	0.97	-0.01
448O1c	1	2	1950	0	1	0	0	2099.98	1	0	0	0	2170.85	2029.1	1763	0.95	-0.02
7CQ3k8	0	1	1974	0	1	0	0	2050.58	1	0	0	0	2264.95	1836.2	2137.58	0.9	-0.05
UE73qp	1	1	1966	0	1	0	0	2039.15	1	0	0	0	2205.65	1872.65	1655.13	0.9	-0.05
uxrCNc	0	1	1980	0	1	0	0	2029.4	1	0	0	0	2074.35	1984.45	2617.93	0.97	-0.01
i74bar	1	1	1960	0	1	0	0	1973.48	1	0	0	0	2311.7	1635.25	1690.3	0.98	-0.01
yzvjKC	1	1	1980	0	1	0	0	1869.1	1	0	0	0	1914	1824.2	1854.35	0.95	-0.02
SBj9ia	1	2	1957	0	1	0	0	1823.55	1	0	0	0	1700.2	1946.9	1634.35	0.95	-0.02
WqYslw	1	1	1963	0	1	0	0	1804.4	1	0	0	0	1900.2	1708.6	2396.46	0.92	-0.04
GNlIRJ	0	1	1981	0	1	0	0	1766.5	1	0	0	0	1739.15	1793.85	1658.63	0.98	-0.01
Gl3Emo	0	2	1969	0	1	0	0	1762.35	1	0	0	0	1725.65	1799.05	2757.1	0.85	-0.07
N0IUxK	0	1	1974	0	1	0	0	1752.8	1	0	0	0	2040.05	1465.55	2203.28	0.97	-0.01
wHONbJ	1	1	1979	0	1	0	0	1748.4	1	0	0	0	1721.8	1775	1301.85	0.95	-0.02
zS2pzS	1	1	1961	0	1	0	0	1707.68	1	0	0	0	1679.35	1736	1668.08	0.92	-0.04
YPhMaz	1	1	1954	0	1	0	0	1699.08	1	0	0	0	1574.15	1824	2689.98	0.87	-0.06
AT4Z0d	1	1	1962	0	1	0	0	1668	1	0	0	0	1712.65	1623.35	1337.55	1	0
KO3XCh	1	1	1959	0	1	0	0	1663.73	1	0	0	0	1886	1441.45	2138.75	0.97	-0.01
RCYU2m	1	1	1948	0	1	0	0	1662.23	1	0	0	0	1741.4	1583.05	2248.47	0.84	-0.08
UFROxW	1	1	1976	0	1	0	0	1625.45	1	0	0	0	1747.75	1503.15	2310.98	1	0
GxFnsr	1	1	1981	0	1	0	0	1608.63	1	0	0	0	1599.15	1618.1	2269.31	0.86	-0.06
lSh8Cy	0	1	1981	0	1	0	0	1604.05	1	0	0	0	1718.45	1489.65	2353.38	0.95	-0.02
mGzUrH	0	1	1981	0	1	0	0	1593.65	1	0	0	0	1640.65	1546.65	1898.4	1	0
16jSv8	1	1	1976	0	1	0	0	1592.97	1	0	0	0	1525.53	1657.05	1512.43	1	0
vQxiKG	0	1	1952	0	1	0	0	1580.03	1	0	0	0	1547.65	1612.4	1513	0.98	-0.01
hBHMKo	1	1	1966	0	1	0	0	1575.1	1	0	0	0	1590.65	1559.55	1682.53	0.95	-0.02
LjjhKx	1	1	1967	0	1	0	0	1547.23	1	0	0	0	1658.25	1436.2	2048.75	1	0
QvRGxH	0	1	1981	0	1	0	0	1547.18	1	0	0	0	1769.45	1324.9	1059.38	1	0
2bsHna	1	2	1966	0	1	0	0	1543.55	1	0	0	0	1711.95	1375.15	1969.72	0.97	-0.01
xQqwxZ	0	3	1973	0	1	0	0	1541.74	1	0	0	0	1585.68	1500	2201.8	0.82	-0.09
2Cpk5A	1	1	1975	0	1	0	0	1535.98	1	0	0	0	1728.3	1343.65	2039.33	0.98	-0.01
hvRa15	0	1	1966	0	1	0	0	1530.13	1	0	0	0	1655.45	1404.8	1670.93	0.98	-0.01
0ggbZL	0	2	1964	0	1	0	0	1523.5	1	0	0	0	1086	1961	2378.53	0.92	-0.03
o0Oh9n	0	1	1975	0	1	0	0	1519.38	1	0	0	0	1617.35	1421.4	1580.83	1	0
tQrbUB	0	2	1976	0	1	0	0	1501.98	1	0	0	0	1429	1574.95	1435.13	0.98	-0.01
olGqxN	1	1	1955	0	1	0	0	1499.25	1	0	0	0	1649.3	1349.2	1135.23	1	0
NyqUCc	1	1	1979	0	1	0	0	1491	1	0	0	0	1411.42	1566.6	1969.58	0.92	-0.03
LYd8SJ	0	1	1978	0	1	0	0	1487.95	1	0	0	0	1549.95	1422.68	1217.18	1	0
VD98BY	1	1	1951	0	1	0	0	1475.38	1	0	0	0	1658.45	1292.3	2355.78	0.88	-0.06
EL6UAo		1	1958	0	1	0	0	1465	1	0	0	0	1519.05	1410.95	2036.1	0.82	-0.09
vCMCtg	1	1	1976	0	1	0	0	1461.9	1	0	0	0	1487.95	1435.85	1693.38	0.88	-0.06
tXTJNT	1	1	1977	0	1	0	0	1445.63	1	0	0	0	1526.1	1365.15	1203	0.98	-0.01
IrSnYN	0	1	1960	0	1	0	0	1435.65	1	0	0	0	1596.9	1274.4	1228.23	1	0
wfuSZN	0	1	1975	0	1	0	0	1425.74	1	0	0	0	1447.5	1402.84	1780.5	1	0
dinCm7	1	1	1974	0	1	0	0	1411.75	1	0	0	0	1440.3	1383.2	2296.43	0.9	-0.05
0VmwD5	1	1	1981	0	1	0	0	1407.53	1	0	0	0	1433.5	1381.55	1556.18	0.98	-0.01
315DYk	1	1	1966	0	1	0	0	1388.8	1	0	0	0	1386.5	1391.1	1447.15	0.98	-0.01
thSYQE	0	1	1981	0	1	0	0	1379.38	1	0	0	0	1493.2	1265.55	1068	1	0
sqNH1i	1	1	1982	0	1	0	0	1368.35	1	0	0	0	1486.05	1250.65	1396.23	1	0
cyGWNT	1	1	1962	0	1	0	0	1367.03	1	0	0	0	1496.1	1237.95	1240.98	1	0
Ye3qKt	1	1	1960	0	1	0	0	1365.35	1	0	0	0	1243.05	1487.65	2298.87	0.89	-0.05
4m1myf	1	1	1976	0	1	0	0	1353.9	1	0	0	0	1481	1226.8	1752.45	0.95	-0.02
SETZgw	0	1	1981	0	1	0	0	1336.98	1	0	0	0	1442.35	1231.6	1570.15	0.93	-0.03
mBFGt5	1	1	1979	0	1	0	0	1335.3	1	0	0	0	1364.3	1306.3	1790	0.92	-0.03
2QZue7	0	1	1981	0	1	0	0	1334.73	1	0	0	0	1357	1312.45	2209.15	0.81	-0.09
WpTAE3	0	1	1983	0	1	0	0	1330.03	1	0	0	0	1592.55	1067.5	1445.74	0.92	-0.04
GFn9Bl	1	1	1956	0	1	0	0	1315.48	1	0	0	0	1359	1271.95	1542.15	0.78	-0.11
hvsv0P	0	1	1972	0	1	0	0	1301.03	1	0	0	0	1409	1193.05	1688.8	0.95	-0.02
VHGUw0	1	1	1975	0	1	0	0	1292.93	1	0	0	0	1443.65	1142.2	1563.28	0.93	-0.03
DttTd9	1	1	1972	0	1	0	0	1283.7	1	0	0	0	1433.05	1134.35	1509.5	0.98	-0.01
qTm50Z	0	1	1975	0	1	0	0	1282.75	1	0	0	0	1275.5	1290	1757.58	1	0
4EiBnE		2	1986	0	1	0	0	1266.35	1	0	0	0	1406.55	1126.15	2073.03	1	0
4PN2Kb	1	1	1953	0	1	0	0	1258.88	1	0	0	0	1407.6	1110.15	1017	0.93	-0.03
aA0wG7	0	1	1990	0	1	0	0	1255.28	1	0	0	0	1321.75	1188.8	2205.18	0.95	-0.02
ikysc4	0		1971	0	1	0	0	1252.58	1	0	0	0	1315.95	1189.2	1392.88	0.98	-0.01
3SmaIE	0	1	1980	0	1	0	0	1252.48	1	0	0	0	1419.8	1085.15	2972.63	0.95	-0.02
R32gWp	1	1	1971	0	1	0	0	1250.7	1	0	0	0	1478.05	1023.35	1387.45	0.98	-0.01
JdXf1I	0	1	1976	0	1	0	0	1246.83	1	0	0	0	1224.6	1269.05	2224.21	0.95	-0.02
GbtRql	1	1	1984	0	1	0	0	1245.93	1	0	0	0	1303.35	1188.5	1063.45	1	0
I12Fwt		1	1974	0	1	0	0	1242.43	1	0	0	0	1492.1	992.75	1111.33	0.95	-0.02
iWG7JU	0	1	1983	0	1	0	0	1233.95	1	0	0	0	1350.75	1117.15	2107.4	0.9	-0.05
r6XSnh	0	1	1966	0	1	0	0	1233.59	1	0	0	0	1328.21	1143.7	1857	0.95	-0.02
GCIPRV		1	1975	0	1	0	0	1233.25	1	0	0	0	1206.3	1260.2	1639.35	0.88	-0.06
h6TnVD	1	1	1986	0	1	0	0	1216.9	1	0	0	0	1342.05	1091.75	1072.45	0.98	-0.01
uDMxNt	1	1	1986	0	1	0	0	1208.08	1	0	0	0	1278.05	1138.1	2963.68	0.94	-0.03
HgmuED		1	1970	0	1	0	0	1185.15	1	0	0	0	1313.9	1056.4	1496.4	0.95	-0.02
D0N0gj	1	1	1974	0	1	0	0	1179.75	1	0	0	0	1154.05	1205.45	1284.63	0.98	-0.01
KqZrQs	0	1	1983	0	1	0	0	1150.15	1	0	0	0	1184.05	1116.25	1564.77	0.95	-0.02
IilWna	1	1	1972	0	1	0	0	1127.53	1	0	0	0	1074.05	1181	1645.9	0.95	-0.02
bOcefi	0	1	1979	0	1	0	0	1124.03	1	0	0	0	1094.1	1153.95	1769.25	1	0
6t1B1q	1	1	1972	0	1	0	0	1100.35	1	0	0	0	1167.9	1032.8	1293	0.87	-0.06
hMFEOR	1	1	1982	0	1	0	0	1053.68	1	0	0	0	1104.45	1002.9	1959.48	0.95	-0.02
XV5zhO	0	1	1978	0	1	0	0	1016	1	0		0		1016	1411.9	0.95	-0.02
JsDrEu	1	1	1956	0	1	0	0	1013.25	1	0	0	0	1096.05	930.45	1300.35	0.98	-0.01
gLNRBW	0	1	1981	0	1	0	0	1003.88	1	0	0	0	1112.55	895.2	1717.85	0.88	-0.06
q0ISTv	0	1	1976	0	1	0	0	987.03	1	0	0	0	977.45	996.6	1606.05	0.95	-0.02
a39dmr	0	1	1973	0	1	0	0	946.8	1	0	0	0	954.65	938.95	1581.7	1	0
DVdZig	0	1	1979	0	1	0	0	926.7	1	0	0	0	902.5	950.9	961.6	0.9	-0.05
pkS5eG	0	1	1974	0	1	0	0	830.03	1	0	0	0	841.15	818.9	860.2	0.98	-0.01
aHPgMR	1	1	1988	0	1	0	0	816.55	1	0	0	0	789.5	843.6	1133.88	0.88	-0.06
Wfa2Re	1	1	1980	0	1	0	0	2339	0.98	-0.01	-0.02	0	2593.7	2084.3	2011.4	0.8	-0.1
x93LTx	1	1	1978	0	1	0	0	2263.75	0.98	-0.01	0	-0.02	2336.85	2190.65	2580.26	0.86	-0.06
z6gZt9	0	1	1969	0	1	0	0	2169.18	0.98	-0.01	0	-0.02	2450.95	1887.4	1935.55	0.98	-0.01
p9vAGg	0	2	1959	0	1	0	0	2125.25	0.98	-0.01	0	-0.02	2087.7	2162.8	1770.65	1	0
yzwKmV	1	1	1988	0	1	0	0	2060.68	0.98	-0.01	-0.02	0	1917.6	2203.75	2123.23	1	0
uWcv2w	0	1	1986	0	1	0	0	1999.4	0.98	-0.01	0	-0.02	2067.2	1931.6	2207.93	0.92	-0.03
bEsJwc	1	1	1962	0	1	0	0	1892.8	0.98	-0.01	-0.02	0	2088.15	1697.45	2366.28	0.95	-0.02
Ip1yJp	1	1	1967	0	1	0	0	1891.73	0.98	-0.01	-0.02	0	2009.25	1774.2	2126.63	0.88	-0.06
R69wib	0	1	1980	0	1	0	0	1872.85	0.98	-0.01	-0.02	0	2000.65	1745.05	1967.98	0.98	-0.01
7HM47b	1	1	1979	0	1	0	0	1756.7	0.98	-0.01	-0.02	0	1790	1723.4	1965.05	0.95	-0.02
uiXtzP	1	1	1964	0	1	0	0	1756.35	0.98	-0.01	0	-0.02	1718.05	1794.65	1344.53	0.95	-0.02
7zbGvS	1	1	1967	0	1	0	0	1697.58	0.98	-0.01	-0.02	0	1782.7	1612.45	1636.23	0.97	-0.01
g5HgIx	1	1	1964	0	1	0	0	1678.9	0.98	-0.01	-0.02	0	1683.7	1674.1	1859.05	0.95	-0.02
MQmdGX	1	1	1983	0	1	0	0	1646	0.98	-0.01	-0.02	0	1635.9	1656.1	1849.08	0.92	-0.03
i2xQVw	1	1	1984	0	1	0	0	1644.4	0.98	-0.01	-0.02	0	1813.45	1475.35	1888.4	0.87	-0.06
R6LasU	1	1	1983	0	1	0	0	1632.75	0.98	-0.01	-0.02	0	1745.25	1520.25	2108.15	0.84	-0.07
cS86UT	1		1960	0	1	0	0	1626.25	0.98	-0.01	-0.02	0	1583.6	1668.9	2291.5	0.59	-0.23
Nfp3lE	0	3	1986	0	1	0	0	1617.58	0.98	-0.01	0	-0.02	1801.5	1433.65	2167.93	0.95	-0.02
9GKg6e	1	3	1977	0	1	0	0	1614.8	0.98	-0.01	-0.02	0	1695.2	1534.4	1704.2	0.98	-0.01
csjmAJ	1	3	1975	0	1	0	0	1610.85	0.98	-0.01	-0.02	0	1649.05	1572.65	2028.4	0.93	-0.03
6FQYs2	1	1	1957	0	1	0	0	1584.98	0.98	-0.01	-0.02	0	1726.4	1443.55	1523.68	1	0
GA3YDW	0	1	1982	0	1	0	0	1566.75	0.98	-0.01	0	-0.02	1791.8	1341.7	2714.92	0.86	-0.06
6g27dD		1	1972	0	1	0	0	1561.9	0.98	-0.01	-0.02	0	1738.85	1384.95	1649.03	0.95	-0.02
TxttB1	1	1	1973	0	1	0	0	1550.45	0.98	-0.01	-0.02	0	1630.8	1470.1	1844.3	0.98	-0.01
EDDfZr	0	2	1977	0	1	0	0	1542.4	0.98	-0.01	-0.02	0	1607.9	1476.9	1751.8	0.95	-0.02
t3xqHB	1	1	1981	0	1	0	0	1536.2	0.98	-0.01	0	-0.02	1552.4	1520	2276.05	0.78	-0.11
kBbpma	1	1	1952	0	1	0	0	1534.68	0.98	-0.01	-0.02	0	1378.15	1691.2	2473	0.85	-0.07
enxv6F	1	1	1988	0	1	0	0	1528.8	0.98	-0.01	-0.02	0	1361.15	1696.45	1969.75	0.97	-0.01
B1bpXG	1	1	1975	0	1	0	0	1516.25	0.98	-0.01	-0.02	0	1612.2	1420.3	2552.3	0.9	-0.05
QoWgbV	1	1	1957	0	1	0	0	1502.4	0.98	-0.01	0	-0.02	1574.55	1430.25	2086.63	0.93	-0.03
RzSeGW	1	2	1950	0	1	0	0	1488.48	0.98	-0.01	-0.02	0	1512.8	1464.15	1395.53	0.93	-0.03
gGX7Oo	0	2	1958	0	1	0	0	1481.43	0.98	-0.01	-0.02	0	1443.95	1518.9	1320.25	0.97	-0.01
P6gC5k	1	2	1985	0	1	0	0	1472.6	0.98	-0.01	-0.02	0	1316.35	1628.85	2086.59	0.89	-0.05
G0bFof	0	1	1967	0	1	0	0	1462.65	0.98	-0.01	-0.02	0	1446	1479.3	2102.8	0.93	-0.03
e7g6NG	1	1	1981	0	1	0	0	1458.88	0.98	-0.01	-0.02	0	1542.85	1374.9	2108.38	0.95	-0.02
ZkjGGB	0	1	1961	0	1	0	0	1458.68	0.98	-0.01	-0.02	0	1509.8	1407.55	1080.73	0.95	-0.02
pkZ5cd	1	1	1983	0	1	0	0	1454.7	0.98	-0.01	-0.02	0	1578.95	1330.45	2395	1	0
Ec2oqX	0	1	1980	0	1	0	0	1450	0.98	-0.01	-0.02	0	1464.4	1435.6	1514.65	1	0
04TNRv	1	1	1981	0	1	0	0	1447.48	0.98	-0.01	-0.02	0	1489.65	1405.3	1509.95	1	0
AeykPx			1951	0	1	0	0	1443.7	0.98	-0.01	-0.02	0	1605.4	1282	1394.58	1	0
wwSuHh	1	1	1966	0	1	0	0	1439.03	0.98	-0.01	-0.02	0	1592.2	1285.85	1826.15	0.87	-0.06
ZaJtKY	1	1	1954	0	1	0	0	1438.68	0.98	-0.01	-0.02	0	1473.45	1403.9	1486.65	0.93	-0.03
Z0RJPu	1	1	1985	0	1	0	0	1431.43	0.98	-0.01	-0.02	0	1464.65	1398.2	1661.75	0.95	-0.02
HwQlR6	1	1	1930	0	1	0	0	1430.03	0.98	-0.01	-0.02	0	1662.5	1197.55	2182.45	0.95	-0.02
f27o8E	1	1	1983	0	1	0	0	1428.93	0.98	-0.01	-0.02	0	1332.8	1525.05	1681.4	0.98	-0.01
IemIvS	1	1	1974	0	1	0	0	1426.18	0.98	-0.01	0	-0.02	1562.45	1289.9	1899.9	0.82	-0.09
6JUMa7	1	1	1980	0	1	0	0	1417.7	0.98	-0.01	-0.02	0	1421.05	1414.35	2221.9	0.88	-0.06
g7Xg9y	0	1	1965	0	1	0	0	1415.3	0.98	-0.01	-0.02	0	1539.85	1290.75	2736.7	0.97	-0.01
sBpbzE	0	1	1983	0	1	0	0	1414.98	0.98	-0.01	-0.02	0	1450.85	1379.1	2077.48	1	0
qwEs1B	1	1	1971	0	1	0	0	1411.55	0.98	-0.01	0	-0.02	1549.7	1273.4	1169.43	0.98	-0.01
umCYYt	1	1	1976	0	1	0	0	1405.05	0.98	-0.01	-0.02	0	1504.6	1305.5	2300.15	0.86	-0.06
t1Jht7	0	3	1982	0	1	0	0	1404.83	0.98	-0.01	-0.02	0	1265.6	1544.05	2324.45	0.95	-0.02
gMbOmo	1	1	1987	0	1	0	0	1401.98	0.98	-0.01	-0.02	0	1565.8	1238.15	1266.6	0.75	-0.12
yzSpiT	0	2	1961	0	1	0	0	1397.33	0.98	-0.01	-0.02	0	1494.35	1300.3	2423	0.78	-0.11
TzYxkX	0	1	1979	0	1	0	0	1392.35	0.98	-0.01	0	-0.02	1300.25	1484.45	2548.73	0.78	-0.11
y9RoOq	0	1	1987	0	1	0	0	1390.6	0.98	-0.01	-0.02	0	1393.05	1388.15	1680.68	0.98	-0.01
oOsrkE	0	1	1986	0	1	0	0	1383.3	0.98	-0.01	-0.02	0	1382.95	1383.65	1670.4	0.9	-0.05
73IpXY	1	1	1985	0	1	0	0	1378.3	0.98	-0.01	-0.02	0	1360.5	1396.1	2027.95	0.92	-0.04
nGGu5u	0	1	1981	0	1	0	0	1365.73	0.98	-0.01	-0.02	0	1452.85	1278.6	1347.3	0.9	-0.05
WOrd7X	1	1	1966	0	1	0	0	1359.75	0.98	-0.01	-0.02	0	1381.2	1338.3	2612.83	0.92	-0.04
ToBo8V	1	1	1966	0	1	0	0	1358.35	0.98	-0.01	0	-0.02	1229.9	1486.8	1339.95	0.78	-0.11
LuthhD	1	1	1984	0	1	0	0	1353.73	0.98	-0.01	-0.02	0	1430.25	1277.2	1739.65	0.9	-0.05
2G7Dz8	1	2	1988	0	1	0	0	1347.13	0.98	-0.01	-0.02	0	1413.8	1280.45	1990.75	0.83	-0.08
wCHvsP	1	1	1972	0	1	0	0	1345.73	0.98	-0.01	-0.02	0	1168.7	1522.75	1221	1	0
61FlRU	1	2	1983	0	1	0	0	1344.43	0.98	-0.01	0	-0.02	1283.1	1405.75	1848.35	1	0
j6ynAK	0	1	1961	0	1	0	0	1342.6	0.98	-0.01	-0.02	0	1296.35	1388.85	1801.13	0.92	-0.04
nONNp4	1	1	1985	0	1	0	0	1339.13	0.98	-0.01	-0.02	0	1398.55	1279.7	1808.28	0.85	-0.07
0Fl6iA	1	1	1965	0	1	0	0	1331.68	0.98	-0.01	0	-0.02	1437.3	1226.05	1433.13	0.93	-0.03
uLgZS0	1	1	1988	0	1	0	0	1328.85	0.98	-0.01	-0.02	0	1390.4	1267.3	2468.3	0.94	-0.03
Y6yMn5	0	1	1974	0	1	0	0	1324.65	0.98	-0.01	-0.02	0	1372.55	1276.75	2113.85	0.64	-0.19
FiSS49	0	2	1973	0	1	0	0	1307.8	0.98	-0.01	-0.02	0	1421.8	1193.8	2188.23	0.89	-0.05
rzNp5A	1	1	1965	0	1	0	0	1292.43	0.98	-0.01	0	-0.02	1308.9	1275.95	1567.75	0.8	-0.1
KifmWt	1	1	1985	0	1	0	0	1286.23	0.98	-0.01	-0.02	0	1316.6	1255.85	1671.72	0.92	-0.04
89aU72	0	1	1972	0	1	0	0	1281.15	0.98	-0.01	0	-0.02	1400.55	1161.75	1316.4	0.9	-0.05
wD2O1p	1	2	1965	0	1	0	0	1279.9	0.98	-0.01	0	-0.02	1251.5	1308.3	1772.65	0.82	-0.09
QKCVGF	1	1	1956	0	1	0	0	1273	0.98	-0.01	0	-0.02	1278.6	1267.4	1975.58	0.93	-0.03
4ORKkZ	0	1	1977	0	1	0	0	1269.1	0.98	-0.01	0	-0.02	1414.7	1123.5	1815.55	0.97	-0.01
DHqiDR	0	1	1974	0	1	0	0	1259.75	0.98	-0.01	-0.02	0	1294.2	1225.3	2515.29	0.97	-0.01
gt3u5D	1	1	1966	0	1	0	0	1257.45	0.98	-0.01	-0.02	0	1364.8	1150.1	1182.13	0.95	-0.02
tzVpA6	0	1	1988	0	1	0	0	1255.1	0.98	-0.01	-0.02	0	1331.6	1178.6	1732.63	0.95	-0.02
oyzQO2	1	1	1983	0	1	0	0	1252	0.98	-0.01	-0.02	0	1287.45	1216.55	2510.87	0.92	-0.04
23g6dk	0	1	1954	0	1	0	0	1248.85	0.98	-0.01	-0.02	0	1423.4	1074.3	1320.23	0.95	-0.02
4nAKPe	1	1	1981	0	1	0	0	1246.9	0.98	-0.01	0	-0.02	1182.1	1311.7	1447.7	0.82	-0.09
wthsUg	0	1	1964	0	1	0	0	1242.73	0.98	-0.01	0	-0.02	1264.5	1220.95	1354.3	0.95	-0.02
nQGTQ7	1	1	1981	0	1	0	0	1242.63	0.98	-0.01	-0.02	0	1278.65	1206.6	1353.83	0.9	-0.05
eFQd2Z	0	1	1974	0	1	0	0	1236.33	0.98	-0.01	0	-0.02	1235.15	1237.5	1912.08	1	0
sPwpjt	1	1	1969	0	1	0	0	1235.9	0.98	-0.01	-0.02	0	1228	1243.8	1479.65	0.88	-0.06
7qdhDB	1	1	1959	0	1	0	0	1232.5	0.98	-0.01	-0.02	0	1301.65	1163.35	1410.03	0.95	-0.02
SHiCbp	1	1	1958	0	1	0	0	1230.78	0.98	-0.01	0	-0.02	1400.5	1061.05	1100.9	0.98	-0.01
skHuFc	1	1	1988	0	1	0	0	1223.48	0.98	-0.01	-0.02	0	1261.95	1185	2066.9	0.9	-0.05
U91SEi	1	1	1988	0	1	0	0	1222.95	0.98	-0.01	-0.02	0	1142.35	1303.55	1060.78	0.88	-0.06
jtSmfZ	1	1	1973	0	1	0	0	1220.88	0.98	-0.01	-0.02	0	1286.35	1155.4	1530.85	0.95	-0.02
A8XLMN	0	1	1977	0	1	0	0	1220.85	0.98	-0.01	0	-0.02	1233.6	1208.1	1117.88	0.95	-0.02
x1C0mb	1	1	1951	0	1	0	0	1219.6	0.98	-0.01	-0.02	0	1166.6	1272.6	1383.38	0.77	-0.11
Lhf4II	0	1	1980	0	1	0	0	1209.5	0.98	-0.01	-0.02	0	1181.85	1237.15	1271.85	0.98	-0.01
cbIqrq	0	1	1953	0	1	0	0	1201.33	0.98	-0.01	-0.02	0	1279.9	1122.75	1459.83	0.95	-0.02
ouf0cG		1	1951	0	1	0	0	1180.85	0.98	-0.01	-0.02	0	1112.15	1249.55	1515.98	0.93	-0.03
PHOPPL	1	1	1978	0	1	0	0	1176.75	0.98	-0.01	0	-0.02	1376.05	977.45	1589.78	0.95	-0.02
QBJL9c	1	1	1986	0	1	0	0	1174.58	0.98	-0.01	-0.02	0	1064.3	1284.85	1532.08	0.93	-0.03
WFfTAn	0	1	1981	0	1	0	0	1167.1	0.98	-0.01	-0.02	0	1286.15	1048.05	1365.4	1	0
EXSgxU	1	1	1984	0	1	0	0	1164.05	0.98	-0.01	0	-0.02	1247.65	1080.45	1300.35	0.82	-0.09
gGkOis	0	1	1982	0	1	0	0	1155.4	0.98	-0.01	0	-0.02	1231.9	1078.9	1592.49	0.92	-0.03
aM6Sut	1	1	1977	0	1	0	0	1153.4	0.98	-0.01	-0.02	0	1220.2	1086.6	1540.7	0.7	-0.15
8UXHLu	1	2	1987	0	1	0	0	1150.75	0.98	-0.01	0	-0.02	1091.9	1209.6	2409.08	0.82	-0.09
Tr2ORM	1	1	1976	0	1	0	0	1144.3	0.98	-0.01	-0.02	0	1161.4	1127.2	1426.2	0.79	-0.1
325OJM	1	1	1974	0	1	0	0	1136.28	0.98	-0.01	-0.02	0	1204.65	1067.9	900.35	0.88	-0.06
s3r8Cj		1	1967	0	1	0	0	1122.13	0.98	-0.01	-0.02	0	1140.3	1103.95	1881.54	0.87	-0.06
BBB1LS	1	1	1971	0	1	0	0	1121.33	0.98	-0.01	0	-0.02	1223.65	1019	1410.6	1	0
NcpK56	1	1	1973	0	1	0	0	1119.53	0.98	-0.01	-0.02	0	1185.9	1053.15	1784.83	0.93	-0.03
gpKvfl	0	1	1980	0	1	0	0	1117.1	0.98	-0.01	-0.02	0	1172.4	1061.8	2290.1	0.78	-0.11
9VZ3gJ	1	1	1986	0	1	0	0	1114.08	0.98	-0.01	-0.02	0	1103.8	1124.35	1738.48	0.97	-0.01
WIn47w	1	1	1958	0	1	0	0	1113.2	0.98	-0.01	-0.02	0	1207.4	1019	1489.03	0.98	-0.01
nRM0UU	1	1	1981	0	1	0	0	1110.35	0.98	-0.01	-0.02	0	1285.45	935.25	1898.95	1	0
KIDowg	0	2	1979	0	1	0	0	1108.38	0.98	-0.01	-0.02	0	1101.45	1115.3	1769.83	0.93	-0.03
Lu6ieB	1	1	1958	0	1	0	0	1095.65	0.98	-0.01	-0.02	0	1109.4	1081.9	1254.68	1	0
UT1pAH	0	1	1985	0	1	0	0	1086.1	0.98	-0.01	-0.02	0	1132.2	1040	1599.8	1	0
KvvrgH	1	2	1960	0	1	0	0	1085.73	0.98	-0.01	-0.02	0	1104.3	1067.15	1077.95	0.95	-0.02
kyk7M6	1	1	1974	0	1	0	0	1083.98	0.98	-0.01	-0.02	0	1146.2	1021.75	1099.58	0.93	-0.03
ektxcj	0	1	1981	0	1	0	0	1082	0.98	-0.01	-0.02	0	1164.15	999.85	1132.08	1	0
3maOhX	1	2	1982	0	1	0	0	1079.28	0.98	-0.01	-0.02	0	1071.75	1086.8	2259.38	0.93	-0.03
ILw36G	1	1	1972	0	1	0	0	1074.43	0.98	-0.01	0	-0.02	1189.1	959.75	1486.78	0.98	-0.01
TmaEy7	0	1	1983	0	1	0	0	1072.18	0.98	-0.01	-0.02	0	1066.3	1078.05	1537.05	0.95	-0.02
1sFrfe	0	1	1977	0	1	0	0	1051.23	0.98	-0.01	-0.02	0	1205.5	896.95	868.2	0.98	-0.01
croBZk	1	1	1988	0	1	0	0	1047.63	0.98	-0.01	-0.02	0	1131.15	964.1	1729.93	0.98	-0.01
1OQIcZ		3	1979	0	1	0	0	1044.53	0.98	-0.01	-0.02	0	1159.5	929.55	923.13	0.98	-0.01
DI4sU9	1	1	1992	0	1	0	0	1039.33	0.98	-0.01	-0.02	0	1108.95	969.7	2189.18	0.9	-0.05
RwA7zr	0	1	1973	0	1	0	0	1039.18	0.98	-0.01	-0.02	0	1061.75	1016.6	1399.45	1	0
kWDJeq	1	1	1983	0	1	0	0	1032.2	0.98	-0.01	-0.02	0	1041.2	1023.2	1028.4	0.85	-0.07
N2KWeO	1	1	1989	0	1	0	0	1007.15	0.98	-0.01	0	-0.02	1092.55	921.75	1690.98	0.89	-0.05
IoSGje	0	1	1980	0	1	0	0	1002.58	0.98	-0.01	-0.02	0	1050.7	954.45	1070.4	0.98	-0.01
wNFGDA	0	1	1980	0	1	0	0	986.23	0.98	-0.01	-0.02	0	1026.55	945.9	1591.33	0.98	-0.01
HNrjY2	0	1	1988	0	1	0	0	985.03	0.98	-0.01	0	-0.02	949.95	1020.1	1186.33	0.95	-0.02
cbj81G	1	1	1983	0	1	0	0	981.9	0.98	-0.01	-0.02	0	1008.8	955	974.78	0.93	-0.03
V5dqHn	0	1	1974	0	1	0	0	964.18	0.98	-0.01	-0.02	0	986.65	941.7	1243.4	0.9	-0.05
U2cqGh	0	1	1992	0	1	0	0	950.65	0.98	-0.01	-0.02	0	966.35	934.95	2024.5	0.97	-0.01
m5Qxp4	1	1	1981	0	1	0	0	930.7	0.98	-0.01	-0.02	0	977.65	883.75	1871.3	0.75	-0.12
PMA72C	0	1	1976	0	1	0	0	929.63	0.98	-0.01	-0.02	0	973.55	885.7	1020.83	0.98	-0.01
U92iW0	0	1	1983	0	1	0	0	919	0.98	-0.01	0	-0.02	967.8	870.2	1297.35	0.95	-0.02
YalNic	1	1	1987	0	1	0	0	913.73	0.98	-0.01	-0.02	0	947.5	879.95	1187.65	0.98	-0.01
M1Yz8C	0	1	1983	0	1	0	0	908.48	0.98	-0.01	0	-0.02	915.15	901.8	1636.18	0.93	-0.03
YeKx9s	0	1	1976	0	1	0	0	896.53	0.98	-0.01	-0.02	0	953.3	839.75	980.7	0.98	-0.01
vBBZM1	1	2	1986	0	1	0	0	896.08	0.98	-0.01	-0.02	0	1002.75	789.4	1001.35	0.95	-0.02
TNeR41	1	1	1978	0	1	0	0	868.98	0.98	-0.01	-0.02	0	899.1	838.85	1289.05	0.88	-0.06
jySPCU	1	1	1985	0	1	0	0	841.3	0.98	-0.01	-0.02	0	924.3	758.3	1773.18	0.89	-0.05
meaebF	1	1	1981	0	1	0	0	832.53	0.98	-0.01	-0.02	0	869.25	795.8	1535.13	0.95	-0.02
85Gae3	0	1	1976	0	1	0	0	804.98	0.98	-0.01	0	-0.02	806.55	803.4	875.9	0.98	-0.01
i3ietC	1	1	1974	0	1	0	0	2234.33	0.97	-0.01	-0.02	0	2250.2	2218.45	1558.83	0.68	-0.17
r84csH	1	1	1977	0	1	0	0	2137.63	0.97	-0.01	0	-0.02	2232.7	2042.55	2696.38	0.92	-0.04
Igt7m4	1	1	1966	0	1	0	0	2125.08	0.97	-0.01	-0.02	0	2343.15	1907	2459.8	0.92	-0.04
Jc3KZL	1	1	1976	0	1	0	0	1900.98	0.97	-0.01	0	-0.02	1830.9	1971.05	1226.75	1	0
VSbMnt	1	1	1978	0	1	0	0	1837.1	0.97	-0.01	-0.02	0	1799.9	1874.3	2417.44	0.95	-0.02
bCMCrj	1	1	1981	0	1	0	0	1817.95	0.97	-0.01	-0.02	0	1624.1	2011.8	2506.13	0.92	-0.03
4NV32X	1	1	1968	0	1	0	0	1797.28	0.97	-0.01	0	-0.02	1857.16	1740.4	2549.5	0.92	-0.03
CaXdYH	1	1	1961	0	1	0	0	1736.63	0.97	-0.01	-0.02	0	1927.25	1546	1500.74	0.97	-0.01
HfoKtO	0	2	1947	0	1	0	0	1719.18	0.97	-0.01	-0.02	0	1621.63	1811.85	1122.93	1	0
ViR5HQ	1	1	1974	0	1	0	0	1645.75	0.97	-0.01	-0.02	0	1879	1412.5	1867.23	0.92	-0.03
of0lio	0	1	1980	0	1	0	0	1642.7	0.97	-0.01	0	-0.02	1667.35	1618.05	1592.5	0.98	-0.01
CjpaON	1	1	1973	0	1	0	0	1613.78	0.97	-0.01	-0.02	0	1728.85	1498.7	2503.95	0.81	-0.09
clT9Ss	0	1	1995	0	1	0	0	1611.48	0.97	-0.01	-0.02	0	1514.7	1708.25	1718.75	0.93	-0.03
rUaiOU	1		1956	0	1	0	0	1566.75	0.97	-0.01	-0.02	0	1663.25	1470.25	1583.08	0.98	-0.01
evXmAG	0	1	1982	0	1	0	0	1534.75	0.97	-0.01	-0.02	0	1473.9	1595.6	2777.53	0.9	-0.05
7NxNHk	1	1	1979	0	1	0	0	1534.4	0.97	-0.01	-0.02	0	1754.6	1314.2	1987.45	0.93	-0.03
otoyfH	1	1	1985	0	1	0	0	1514.4	0.97	-0.01	-0.02	0	1670.65	1358.15	1313.7	1	0
Ur9u8m	1	1	1958	0	1	0	0	1508.45	0.97	-0.01	-0.02	0	1791.25	1225.65	1634.3	0.85	-0.07
HztzNx	1	1	1969	0	1	0	0	1487.23	0.97	-0.01	-0.02	0	1622.45	1352	1558.48	0.82	-0.09
iMhl2B	0	1	1979	0	1	0	0	1415.65	0.97	-0.01	-0.02	0	1353.9	1477.4	1372.23	1	0
RAij15	1	1	1985	0	1	0	0	1398.41	0.97	-0.01	-0.02	0	1450.35	1343.74	1531.73	0.8	-0.1
DVvD4d	1	1	1988	0	1	0	0	1336.05	0.97	-0.01	-0.02	0	1391.3	1280.8	1677.75	0.9	-0.05
CeOsTl			1969	0	1	0	0	1287.1	0.97	-0.01	-0.02	0	1449.3	1124.9	1652.31	0.95	-0.02
tDavJc	1	2	1947	0	1	0	0	1277.77	0.97	-0.01	-0.02	0	1194.21	1357.15	1239.8	0.85	-0.07
eOL8KM	0	1	1973	0	1	0	0	1226.35	0.97	-0.01	-0.02	0	1397.2	1055.5	1610.3	0.93	-0.03
EXaAz1	1	1	1985	0	1	0	0	1119.05	0.97	-0.01	-0.02	0	1120.2	1117.9	1621.5	1	0
rgBrEH	0	1	1961	0	1	0	0	1047.28	0.97	-0.01	-0.02	0	1213.55	881	1431.45	0.88	-0.06
lxJpUQ	1	1	1982	0	1	0	0	881.13	0.97	-0.01	-0.02	0	897.9	863.47	1279.28	0.88	-0.06
gzkR3u	0	2	1984	0	1	0	0	822.05	0.97	-0.01	-0.02	0	797.3	848.11	1011.95	0.95	-0.02
Rl7ie2	1	2	1969	0	1	0	0	2176.41	0.97	-0.01	0	-0.02	2384.3	1957.58	2428.35	0.85	-0.07
tV0Fax	0	1	1930	0	1	0	0	2028.69	0.97	-0.01	-0.02	0	2163.47	1900.65	1506.93	0.95	-0.02
9dG03V	0	2	1987	0	1	0	0	2017.13	0.97	-0.01	-0.02	0	2048.25	1984.37	2233.74	0.76	-0.12
tjNsZB	0	1	1991	0	1	0	0	1993.53	0.97	-0.01	-0.02	0	1830.85	2156.2	2201.33	0.92	-0.04
pj0zJL	1	1	1976	0	1	0	0	1988.15	0.97	-0.01	-0.02	0	1951.7	2024.6	2562.55	1	0
vIlJW2	0	1	1979	0	1	0	0	1772.46	0.97	-0.01	-0.02	0	1764.45	1780.89	2048.63	0.95	-0.02
iBh8bv	1	1	1965	0	1	0	0	1690.87	0.97	-0.01	-0.02	0	1647.47	1732.1	2144.44	0.76	-0.12
Z0aLKm	1	1	1976	0	1	0	0	1669.05	0.97	-0.01	-0.02	0	1634.2	1703.9	1528.85	1	0
zIVMKa	0	1	1965	0	1	0	0	1625.82	0.97	-0.01	0	-0.02	1650.89	1602	1397.03	1	0
4n9IDE	1	1	1962	0	1	0	0	1608.18	0.97	-0.01	-0.02	0	1834.95	1369.47	1843.53	0.85	-0.07
VKBsmD	1	1	1977	0	1	0	0	1490.74	0.97	-0.01	-0.02	0	1765.84	1229.4	1787.03	0.95	-0.02
t9Gyxt	1	1	1960	0	1	0	0	2048.87	0.97	-0.01	-0.02	0	2195.65	1894.37	1308.38	1	0
SByCkk	0	1	1956	0	1	0	0	1859.49	0.97	-0.01	-0.02	0	1688.68	2021.75	2325.65	0.92	-0.03
RcSUTZ	1	1	1959	0	1	0	0	1835.41	0.97	-0.01	0	-0.02	2113.79	1570.95	1182.55	0.88	-0.06
smZYBm	1	1	1959	0	1	0	0	1638.08	0.97	-0.01	-0.03	0	1736.58	1544.5	1989.08	0.88	-0.06
cmIzfn	0	2	1981	0	1	0	0	1569.82	0.97	-0.01	-0.02	0	1582.16	1558.1	2087.03	0.8	-0.1
WSVXU3	0	1	1977	0	1	0	0	1623.95	0.97	-0.01	-0.03	0	1675.8	1572.1	2060.23	0.78	-0.11
DzEYXt	0	1	1978	0	1	0	0	2083.85	0.97	-0.01	-0.03	0	1941.5	2226.2	1864.23	0.88	-0.06
tWoQtK	1	1	1981	0	1	0	0	2217.63	0.95	-0.02	0	-0.05	2344.6	2090.65	2204.33	0.95	-0.02
5rPS06	1	1	1955	0	1	0	0	2070.58	0.95	-0.02	-0.05	0	2130.35	2010.8	3158.95	0.83	-0.08
nVdPmb	1	3	1981	0	1	0	0	2009.1	0.95	-0.02	-0.02	-0.02	1917.75	2100.45	2929.83	0.78	-0.11
ZowdAC	1		1955	0	1	0	0	1979.73	0.95	-0.02	-0.05	0	1981.95	1977.5	2496.95	0.76	-0.12
I8ygfV	0	1	1960	0	1	0	0	1929.83	0.95	-0.02	-0.02	-0.02	1952.05	1907.6	1857.8	0.95	-0.02
UsTYyR	1	1	1970	0	1	0	0	1918.38	0.95	-0.02	-0.02	-0.02	2058.4	1778.35	2184.83	0.95	-0.02
3vGtwO	0	1	1984	0	1	0	0	1897.75	0.95	-0.02	-0.05	0	2207.4	1588.1	2237.58	0.97	-0.01
iNs4OY	1	1	1973	0	1	0	0	1897.25	0.95	-0.02	0	-0.05	2076.45	1718.05	2377.03	0.95	-0.02
QLq3GX	1	1	1984	0	1	0	0	1887.7	0.95	-0.02	-0.05	0	1931.6	1843.8	2569.03	0.73	-0.14
jofvUt	0	1	1942	0	1	0	0	1877.18	0.95	-0.02	-0.05	0	1895.1	1859.25	2438.25	0.78	-0.11
n1XEBU	1	1	1987	0	1	0	0	1843.83	0.95	-0.02	-0.05	0	1700.2	1987.45	2159.49	0.76	-0.12
BRm4TZ		1	1961	0	1	0	0	1804.68	0.95	-0.02	-0.02	-0.02	1891.45	1717.9	2155.83	0.75	-0.12
09XleU	1	1	1982	0	1	0	0	1786.25	0.95	-0.02	-0.02	-0.02	1603.55	1968.95	2983.34	0.88	-0.05
5J15BA	1	1	1981	0	1	0	0	1776.95	0.95	-0.02	-0.05	0	1931.25	1622.65	1950.08	1	0
6merlm	1	1	1984	0	1	0	0	1740.15	0.95	-0.02	-0.05	0	1759.35	1720.95	2485.21	0.86	-0.06
IlEXPm	1	2	1970	0	1	0	0	1726.78	0.95	-0.02	-0.05	0	1811.35	1642.2	2209.95	0.89	-0.05
Yu4XQw	0	1	1975	0	1	0	0	1719	0.95	-0.02	-0.05	0	1771.35	1666.65	2376.53	0.97	-0.01
tnTE3d	1	1	1964	0	1	0	0	1717.85	0.95	-0.02	-0.02	-0.02	1774.05	1661.65	1953.7	0.82	-0.09
JD36rd	1	1	1987	0	1	0	0	1712.2	0.95	-0.02	-0.05	0	1823.6	1600.8	2092.2	1	0
J8TcVk	1	1	1980	0	1	0	0	1694.8	0.95	-0.02	-0.05	0	1577.35	1812.25	1480.75	0.95	-0.02
BSppZd		1	1962	0	1	0	0	1682.08	0.95	-0.02	-0.05	0	1649.6	1714.55	1231.93	0.88	-0.06
lA3nMs	1	1	1957	0	1	0	0	1670.28	0.95	-0.02	-0.05	0	1522.75	1817.8	1634.78	0.98	-0.01
QJ9E4U	1	2	1975	0	1	0	0	1663.8	0.95	-0.02	-0.05	0	1765.15	1562.45	1931.18	0.98	-0.01
aohMf6	0	1	1975	0	1	0	0	1658.25	0.95	-0.02	-0.02	-0.02	1588.2	1728.3	1387.45	1	0
pha2uN	1	1	1964	0	1	0	0	1653.53	0.95	-0.02	-0.02	-0.02	1675.75	1631.3	1917.53	0.68	-0.17
qUaz3O	1	1	1984	0	1	0	0	1650.55	0.95	-0.02	-0.02	-0.02	1528.1	1773	2664.69	0.89	-0.05
GP0toY	1	1	1983	0	1	0	0	1643.85	0.95	-0.02	-0.05	0	1665.7	1622	1851.9	0.85	-0.07
OUOVDX	1	1	1959	0	1	0	0	1612.65	0.95	-0.02	-0.02	-0.02	1763.8	1461.5	1991.15	0.95	-0.02
2rDjkv	1	1	1978	0	1	0	0	1607.28	0.95	-0.02	-0.05	0	1673.65	1540.9	2386.7	1	0
J4BYgn	1	2	1990	0	1	0	0	1604.1	0.95	-0.02	-0.05	0	1536.8	1671.4	2804.33	0.81	-0.09
8IqOof	1	1	1981	0	1	0	0	1588.6	0.95	-0.02	-0.02	-0.02	1627.85	1549.35	1717.55	0.92	-0.03
dd227q	0	1	1981	0	1	0	0	1568.73	0.95	-0.02	-0.05	0	1537.95	1599.5	2091	0.97	-0.01
Tvjol0	0	1	1956	0	1	0	0	1567.13	0.95	-0.02	-0.05	0	1592.6	1541.65	1958.7	0.9	-0.05
y0tLwS	1	1	1981	0	1	0	0	1539.03	0.95	-0.02	-0.05	0	1439.9	1638.15	1423.28	0.97	-0.01
UYLXaS	0	1	1989	0	1	0	0	1523.05	0.95	-0.02	-0.05	0	1553.75	1492.35	1614.58	0.98	-0.01
X9Jec7	1	1	1966	0	1	0	0	1507.68	0.95	-0.02	-0.02	-0.02	1528.75	1486.6	1421.05	0.98	-0.01
10su3F	1	1	1984	0	1	0	0	1494.7	0.95	-0.02	-0.05	0	1758.3	1231.1	2105.03	0.87	-0.06
Id8dMD	1	2	1949	0	1	0	0	1493.43	0.95	-0.02	-0.02	-0.02	1562.3	1424.55	1738.28	0.93	-0.03
FfkOBR	0	1	1968	0	1	0	0	1492.6	0.95	-0.02	-0.02	-0.02	1576.65	1408.55	2050.75	0.95	-0.02
K44Om8	1	3	1944	0	1	0	0	1489.23	0.95	-0.02	-0.02	-0.02	1506.5	1471.95	2078.88	0.83	-0.08
VoFn92	1	1	1960	0	1	0	0	1487.48	0.95	-0.02	-0.02	-0.02	1608.05	1366.9	2339.77	0.78	-0.11
JAMqEV	1	1	1982	0	1	0	0	1462.9	0.95	-0.02	-0.05	0	1598.45	1327.35	3042.54	0.91	-0.04
Dp5YQL	1	1	1978	0	1	0	0	1455.38	0.95	-0.02	-0.02	-0.02	1370.25	1540.5	2267.95	0.92	-0.03
VTAqOt	1	1	1963	0	1	0	0	1452.68	0.95	-0.02	-0.05	0	1443.7	1461.65	2224.98	0.85	-0.07
TBdjuE	1	1	1970	0	1	0	0	1446.88	0.95	-0.02	-0.02	-0.02	1434.4	1459.35	1697.36	0.92	-0.04
tHUPMR	0	1	1988	0	1	0	0	1445.9	0.95	-0.02	-0.05	0	1525.2	1366.6	1771.45	0.9	-0.05
rXNGWe	0	1	1973	0	1	0	0	1444.95	0.95	-0.02	-0.05	0	1367.2	1522.7	1447.65	0.9	-0.05
gZyHZK	0	1	1978	0	1	0	0	1436.93	0.95	-0.02	-0.02	-0.02	1406.85	1467	1630.25	1	0
O65BMJ	1	1	1989	0	1	0	0	1434.65	0.95	-0.02	-0.05	0	1582.45	1286.85	2456.68	0.82	-0.09
4gD83g	1	1	1970	0	1	0	0	1427.78	0.95	-0.02	-0.05	0	1516.45	1339.1	2592.83	0.82	-0.09
le3iVg	1	1	1954	0	1	0	0	1402.75	0.95	-0.02	-0.05	0	1344.5	1461	1932.83	0.9	-0.05
aKDtId		1	1988	0	1	0	0	1398.93	0.95	-0.02	-0.02	-0.02	1415.65	1382.2	2250.25	0.95	-0.02
75Grv4	1	1	1964	0	1	0	0	1387.25	0.95	-0.02	-0.05	0	1378.2	1396.3	1281.25	0.95	-0.02
E3gQ6f	0	1	1956	0	1	0	0	1387.03	0.95	-0.02	-0.02	-0.02	1320.3	1453.75	1425.4	0.87	-0.06
Z22SO8	0	1	1986	0	1	0	0	1377.7	0.95	-0.02	-0.05	0	1320.35	1435.05	1702.53	0.95	-0.02
ZtvstO	0	3	1967	0	1	0	0	1366.55	0.95	-0.02	-0.05	0	1401.4	1331.7	1497.05	0.73	-0.14
tInjbN		1	1954	0	1	0	0	1364.83	0.95	-0.02	-0.02	-0.02	1256.25	1473.4	1408.2	0.9	-0.05
vWZiUh	0	2	1969	0	1	0	0	1363.15	0.95	-0.02	-0.02	-0.02	1487.05	1239.25	2258.73	0.9	-0.05
lmrByu	1	1	1976	0	1	0	0	1360.5	0.95	-0.02	-0.05	0	1495.25	1225.75	2114.82	0.84	-0.07
hP4l7M	1	1	1973	0	1	0	0	1359.3	0.95	-0.02	-0.02	-0.02	1467.9	1250.7	1317.98	0.98	-0.01
UyMSR0	1	1	1971	0	1	0	0	1354.25	0.95	-0.02	-0.05	0	1383.55	1324.95	1696.75	1	0
N9IIff	1	1	1972	0	1	0	0	1349.4	0.95	-0.02	-0.02	-0.02	1462.45	1236.35	1262.8	0.73	-0.14
lSL0K7	0	1	1961	0	1	0	0	1333.58	0.95	-0.02	-0.02	-0.02	1459.2	1207.95	1704.38	0.95	-0.02
jrh2SD	1	1	1954	0	1	0	0	1328.13	0.95	-0.02	-0.05	0	1450.75	1205.5	2708.53	0.85	-0.07
V0kWNc	1	1	1970	0	1	0	0	1322.28	0.95	-0.02	-0.05	0	1382.1	1262.45	1557.08	0.93	-0.03
nD3TK8	1	1	1966	0	1	0	0	1322.2	0.95	-0.02	-0.05	0	1240.8	1403.6	2656.13	0.92	-0.04
jgNg1l	1	1	1968	0	1	0	0	1322.18	0.95	-0.02	-0.05	0	1411.1	1233.25	1781.15	0.85	-0.07
eDTOpQ	0	1	1968	0	1	0	0	1309.08	0.95	-0.02	-0.02	-0.02	1365.4	1252.75	1725.68	0.88	-0.06
eDumEn	1	1	1978	0	1	0	0	1307.28	0.95	-0.02	-0.05	0	1358.15	1256.4	1934.64	0.68	-0.16
1V4gGd	1	1	1972	0	1	0	0	1304.2	0.95	-0.02	-0.02	-0.02	1404.6	1203.8	1582.72	0.89	-0.05
PhyzFT	1	1	1967	0	1	0	0	1303.4	0.95	-0.02	-0.05	0	1288.3	1318.5	2373.81	0.91	-0.04
I2cISd	1	1	1971	0	1	0	0	1296.83	0.95	-0.02	-0.02	-0.02	1187.95	1405.7	1943.75	0.88	-0.06
cZ0xFl	1	1	1961	0	1	0	0	1295.75	0.95	-0.02	0	-0.05	1181.7	1409.8	2092.3	0.92	-0.03
opfjik	1	2	1984	0	1	0	0	1294.6	0.95	-0.02	-0.02	-0.02	1432.15	1157.05	1368.73	0.95	-0.02
tUKY4A	1	3	1966	0	1	0	0	1285.88	0.95	-0.02	-0.05	0	1529.85	1041.9	2281.13	0.72	-0.14
zG6x3Y	0	1	1984	0	1	0	0	1285.6	0.95	-0.02	-0.05	0	1173.2	1398	1291.98	0.98	-0.01
IW7yoy	1	1	1983	0	1	0	0	1277.03	0.95	-0.02	-0.02	-0.02	1123.4	1430.65	1482.05	0.88	-0.06
BgL4uF	0	1	1986	0	1	0	0	1270.48	0.95	-0.02	-0.05	0	1219	1321.95	1392.25	0.88	-0.06
o03C3i	1	1	1980	0	1	0	0	1270.18	0.95	-0.02	-0.05	0	1311.8	1228.55	1993.08	0.95	-0.02
Lkeit3	1	1	1978	0	1	0	0	1257.7	0.95	-0.02	-0.05	0	1283.1	1232.3	1395.43	0.85	-0.07
Zf3UY6	1		1976	0	1	0	0	1255.53	0.95	-0.02	-0.05	0	1310.55	1200.5	1684.03	0.92	-0.04
i8vEaM	1	1	1976	0	1	0	0	1251.03	0.95	-0.02	-0.02	-0.02	1229.05	1273	1292.75	0.98	-0.01
bPf10g	1	1	1988	0	1	0	0	1245.7	0.95	-0.02	-0.05	0	1309.35	1182.05	1268.13	0.85	-0.07
ilcs5V	0	2	1977	0	1	0	0	1245.23	0.95	-0.02	0	-0.05	1270.85	1219.6	1350.35	0.98	-0.01
H81dV6		1	1964	0	1	0	0	1241.63	0.95	-0.02	-0.05	0	1203.6	1279.65	1669.73	0.85	-0.07
ZgH7nP	1	1	1979	0	1	0	0	1233.45	0.95	-0.02	-0.05	0	1269.35	1197.55	1717.28	0.95	-0.02
YJB0Uu	1	1	1971	0	1	0	0	1225.23	0.95	-0.02	-0.05	0	1354.4	1096.05	1599.41	0.89	-0.05
IyDVcS			1967	0	1	0	0	1224.1	0.95	-0.02	-0.05	0	1327.25	1120.95	1894.36	0.76	-0.12
6d2HXq	1	1	1980	0	1	0	0	1210.4	0.95	-0.02	-0.05	0	1234.05	1186.75	1570.2	0.92	-0.03
4Yq1um	1	1	1972	0	1	0	0	1205.95	0.95	-0.02	-0.05	0	1381.05	1030.85	1561.35	0.87	-0.06
WvxqEk	1	1	1985	0	1	0	0	1195.1	0.95	-0.02	-0.02	-0.02	1219.75	1170.45	2301.78	0.91	-0.04
SUTaVq	1	1	1977	0	1	0	0	1191.88	0.95	-0.02	-0.05	0	1086	1297.75	2016.73	0.92	-0.03
z0n0Aq	1	1	1989	0	1	0	0	1191.43	0.95	-0.02	-0.02	-0.02	1180.95	1201.9	1418.78	0.9	-0.05
3MqT6g	1	1	1982	0	1	0	0	1189.75	0.95	-0.02	-0.05	0	1164.1	1215.4	1588.83	0.92	-0.03
NBYhdl	0	1	1977	0	1	0	0	1180.45	0.95	-0.02	-0.05	0	1277.75	1083.15	1382.15	0.85	-0.07
Wm4XtH	1	1	1975	0	1	0	0	1180.15	0.95	-0.02	-0.05	0	1264.15	1096.15	1386.75	0.85	-0.07
CKc5NW	1	1	1969	0	1	0	0	1175.95	0.95	-0.02	-0.05	0	1146.5	1205.4	1712.28	0.95	-0.02
6VqQUx	0	1	1981	0	1	0	0	1169.73	0.95	-0.02	-0.05	0	1216.55	1122.9	1077.95	1	0
AG9e2I	1	2	1983	0	1	0	0	1167.55	0.95	-0.02	-0.05	0	1181.95	1153.15	2027.08	0.84	-0.07
GRfZ3c	0	1	1978	0	1	0	0	1164.55	0.95	-0.02	-0.05	0	1133.35	1195.75	1272.53	0.98	-0.01
0q3pRS	0	1	1979	0	1	0	0	1158.25	0.95	-0.02	-0.05	0	1144.55	1171.95	2607.08	0.95	-0.02
rAIem6	1	3	1972	0	1	0	0	1149	0.95	-0.02	-0.05	0	1093.55	1204.45	1353.65	0.93	-0.03
atWPNR	0	1	1976	0	1	0	0	1146.23	0.95	-0.02	-0.05	0	1251.8	1040.65	1071.9	1	0
aCyr33	0	1	1973	0	1	0	0	1143.6	0.95	-0.02	-0.02	-0.02	1103	1184.2	1273.35	0.97	-0.01
6AwrK5	1	1	1958	0	1	0	0	1139.55	0.95	-0.02	-0.05	0	1221.85	1057.25	1273.73	0.98	-0.01
dJYevB	0	1	1978	0	1	0	0	1134.6	0.95	-0.02	-0.05	0	1166.6	1102.6	1641.73	0.93	-0.03
5ldZPW	1		1977	0	1	0	0	1133.68	0.95	-0.02	-0.02	-0.02	1053.2	1214.15	1850.88	0.9	-0.05
2tWmO8	1	1	1974	0	1	0	0	1131.28	0.95	-0.02	-0.05	0	1288.25	974.3	2198	0.95	-0.02
hAqOT3	1	1	1982	0	1	0	0	1125.83	0.95	-0.02	-0.05	0	1194.55	1057.1	1058.18	0.95	-0.02
cnAk5r	0	1	1984	0	1	0	0	1119.15	0.95	-0.02	-0.02	-0.02	1231.6	1006.7	1940.98	0.95	-0.02
QcvV9G	1	3	1970	0	1	0	0	1115.1	0.95	-0.02	0	-0.05	1091	1139.2	1107.93	0.93	-0.03
TYCIIH	1	1	1954	0	1	0	0	1104.3	0.95	-0.02	-0.02	-0.02	1061.4	1147.2	1709.95	0.92	-0.04
NzvGEQ	1	1	1962	0	1	0	0	1104.18	0.95	-0.02	-0.05	0	1133.45	1074.9	1527.68	0.9	-0.05
YmtG9L	0	1	1982	0	1	0	0	1096.65	0.95	-0.02	-0.02	-0.02	1102.05	1091.25	1616.45	0.93	-0.03
RtijCU	1	1	1984	0	1	0	0	1095.65	0.95	-0.02	-0.05	0	1043.05	1148.25	1544.53	0.95	-0.02
6B0SAQ	1	1	1961	0	1	0	0	1091.55	0.95	-0.02	-0.02	-0.02	1230.65	952.45	1723.85	0.87	-0.06
ttvWI5	0	1	1984	0	1	0	0	1089.28	0.95	-0.02	-0.05	0	1159.15	1019.4	1364.28	0.98	-0.01
iM2k9l		1	1977	0	1	0	0	1087.78	0.95	-0.02	-0.05	0	1110.55	1065	2138.54	0.92	-0.04
aK9TjT	0	1	1948	2	1	0	0	1072.25	0.95	-0.02	-0.02	-0.02	1112.55	1031.95	1084.8	1	0
f14EvI		1	1985	0	1	0	0	1066.8	0.95	-0.02	-0.05	0	1184.25	949.35	1722.6	0.9	-0.05
kMR5HD	1	1	1984	0	1	0	0	1061.93	0.95	-0.02	-0.05	0	1066.6	1057.25	1490.23	0.87	-0.06
4bzWGj	0	1	1975	0	1	0	0	1052.28	0.95	-0.02	-0.05	0	1027.3	1077.25	1142.6	0.98	-0.01
Zh6hK2	0	1	1974	0	1	0	0	1050.88	0.95	-0.02	-0.05	0	1079.15	1022.6	1284.6	0.8	-0.1
KUEOw0	1	1	1989	0	1	0	0	1045.03	0.95	-0.02	-0.05	0	1022	1068.05	1474.63	1	0
4pAH9v	1	1	1977	0	1	0	0	1042.78	0.95	-0.02	-0.05	0	1069.35	1016.2	1089.25	0.98	-0.01
vnHj5f	1	2	1961	0	1	0	0	1042.28	0.95	-0.02	-0.05	0	1100.65	983.9	1685.1	0.89	-0.05
wrjDdd	1	1	1986	0	1	0	0	1027.73	0.95	-0.02	-0.05	0	1093.1	962.35	2778.37	1	0
I3JsNj	0	1	1975	0	1	0	0	1020.55	0.95	-0.02	-0.02	-0.02	1074.65	966.45	1587.3	0.88	-0.06
fW76Sm	1	1	1973	0	1	0	0	1020.13	0.95	-0.02	-0.05	0	1080.05	960.2	1660.03	0.9	-0.05
ZkjllP	1	1	1982	0	1	0	0	1013.95	0.95	-0.02	-0.05	0	1004.75	1023.15	1224.25	0.9	-0.05
MtJb2A	1	1	1977	0	1	0	0	1009.45	0.95	-0.02	-0.05	0	993.05	1025.85	1601.5	0.95	-0.02
ymVjzm		1	1967	0	1	0	0	1003.48	0.95	-0.02	-0.05	0	1052.3	954.65	1501.48	0.9	-0.05
lJrBDQ	1	1	1978	0	1	0	0	1000.33	0.95	-0.02	-0.05	0	1081.45	919.2	1455.23	0.88	-0.06
hP80Fu	1	1	1982	0	1	0	0	998.2	0.95	-0.02	-0.05	0	918.25	1078.15	1493.44	0.92	-0.04
EEsOSt	1	1	1977	0	1	0	0	992.9	0.95	-0.02	-0.05	0	1020.85	964.95	1244.15	0.95	-0.02
SVofY0	0	1	1973	0	1	0	0	987.9	0.95	-0.02	-0.02	-0.02	1034	941.8	1170.33	0.85	-0.07
PfcVE9	1	1	1974	0	1	0	0	986.38	0.95	-0.02	-0.05	0	989.75	983	805.95	0.93	-0.03
Ak12kJ	0	1	1982	0	1	0	0	980.63	0.95	-0.02	-0.05	0	1053.65	907.6	1079.71	1	0
y7Dl8D	0	1	1979	0	1	0	0	971.15	0.95	-0.02	-0.05	0	980.15	962.15	1115.05	1	0
683Zgi	1	1	1978	0	1	0	0	967.48	0.95	-0.02	-0.02	-0.02	927.95	1007	1060.3	0.85	-0.07
QTAFW6	1	1	1981	0	1	0	0	960.03	0.95	-0.02	-0.05	0	1044.75	875.3	1940.43	0.89	-0.05
sOifTl	0	1	1980	0	1	0	0	950.85	0.95	-0.02	-0.02	-0.02	890.65	1011.05	1449.18	0.9	-0.05
8WwS04	0	1	1986	0	1	0	0	931.15	0.95	-0.02	-0.02	-0.02	983.1	879.2	1207.38	0.95	-0.02
ozCbMe	0	1	1980	0	1	0	0	929.8	0.95	-0.02	-0.05	0	981.25	878.35	1398.9	0.98	-0.01
HriCly	1	1	1969	0	1	0	0	873.95	0.95	-0.02	-0.05	0	886.9	861	1725.62	0.92	-0.04
tUMfr2	0	1	1983	0	1	0	0	871.23	0.95	-0.02	-0.05	0	914.85	827.6	1344.28	0.83	-0.08
hK5knD	1	1	1980	0	1	0	0	851.85	0.95	-0.02	-0.05	0	812.15	891.55	1138.88	0.73	-0.14
m97f6t	0	1	1979	0	1	0	0	836.68	0.95	-0.02	-0.02	-0.02	938.6	734.75	1244.6	0.9	-0.05
Fr4cS1	1		1987	0	1	0	0	818.93	0.95	-0.02	-0.05	0	842.6	795.25	1871.45	0.75	-0.12
yBKhKF	1	1	1969	0	1	0	0	801	0.95	-0.02	-0.02	-0.02	807.65	794.35	1800.4	1	0
XErI8n	0	2	1983	0	1	0	0	745.9	0.95	-0.02	-0.05	0	760.8	731	1408.03	0.9	-0.05
Xj8Fvt	1	1	1983	0	1	0	0	743.53	0.95	-0.02	-0.05	0	752	735.05	916.18	0.98	-0.01
4mMj2V	1	1	1949	0	1	0	0	2341.4	0.95	-0.02	-0.05	0	2157.9	2524.9	2382.05	0.79	-0.1
zOpOha	1	1	1964	0	1	0	0	2215.23	0.95	-0.02	-0.05	0	2462.6	1967.85	2234.78	0.46	-0.34
fBZK83	1	1	1966	0	1	0	0	1798.18	0.95	-0.02	-0.02	-0.02	1895.2	1701.15	2115.18	0.95	-0.02
PADT78	1	1	1955	0	1	0	0	1744.48	0.95	-0.02	-0.05	0	1662.2	1826.75	2317.87	0.82	-0.09
KQMkdY	0	1	1989	0	1	0	0	1619.05	0.95	-0.02	-0.02	-0.02	1536.5	1701.6	2953.08	0.76	-0.12
dudDWM	0	1	1969	0	1	0	0	1600.18	0.95	-0.02	-0.02	-0.02	1815.2	1385.15	1213.48	1	0
YzBgWl	1	1	1984	0	1	0	0	1593.2	0.95	-0.02	-0.05	0	1540.4	1646	2093.54	0.89	-0.05
EDdrAk	1	1	1972	0	1	0	0	1367.58	0.95	-0.02	0	-0.05	1274.9	1460.25	1919.5	0.95	-0.02
avjpzi	0		1976	0	1	0	0	1324.41	0.95	-0.02	-0.02	-0.02	1266.2	1385.68	1595.13	0.9	-0.05
ayu2Rd	1	1	1983	0	1	0	0	1302.6	0.95	-0.02	-0.02	-0.02	1444.65	1160.55	1646.63	0.83	-0.08
ac6QWb	1	2	1971	0	1	0	0	1262.53	0.95	-0.02	-0.05	0	1339.25	1185.8	1764.05	0.83	-0.08
pihCVT	0	1	1984	0	1	0	0	2205.43	0.95	-0.02	-0.02	-0.02	2074.35	2336.5	1875.98	0.97	-0.01
sOHueb	0	3	1962	0	1	0	0	2045.18	0.95	-0.02	-0.02	-0.02	1842.74	2237.5	3153.69	0.88	-0.06
FgHSar	1	1	1976	0	1	0	0	2008.3	0.95	-0.02	-0.05	0	1967.9	2048.7	2676.33	0.92	-0.04
2H5GyM	1	1	1966	0	1	0	0	1881.23	0.95	-0.02	-0.05	0	2112.05	1661.95	2153.93	0.98	-0.01
9P3J0E	1	2	1988	0	1	0	0	1745.68	0.95	-0.02	-0.02	-0.02	1832.75	1658.6	1853.58	0.85	-0.07
uUfbjk	0	1	1978	0	1	0	0	1736.08	0.95	-0.02	-0.02	-0.02	1798.85	1670	1127.78	1	0
xIL4Ue	1	1	1967	0	1	0	0	1702.97	0.95	-0.02	-0.02	-0.02	1719.9	1685.16	1943.98	0.82	-0.09
U8WjYd	1	1	1963	0	1	0	0	1631.85	0.95	-0.02	-0.02	-0.02	1703.95	1563.35	1846.18	0.88	-0.06
z5cU8h	1	1	1975	0	1	0	0	1614.56	0.95	-0.02	-0.02	-0.02	1562.47	1664.05	1250.05	0.88	-0.06
AbiCnu	1	1	1990	0	1	0	0	1604.26	0.95	-0.02	-0.05	0	1858.6	1336.53	1881.08	0.93	-0.03
lZFDL0	1	1	1955	0	1	0	0	1347.64	0.95	-0.02	-0.05	0	1396.47	1301.25	2205.8	0.92	-0.03
kZiGdR	0	2	1941	0	1	0	0	2198.15	0.95	-0.02	-0.02	-0.02	2379.45	2007.32	3046.05	0.71	-0.15
ol9laR	1	2	1950	0	1	0	0	2143	0.95	-0.02	-0.05	0	1929.65	2356.35	3157.03	0.97	-0.01
6U45GS	1	1	1960	0	1	0	0	1931.9	0.95	-0.02	-0.05	0	1796.45	2067.35	1232.33	0.85	-0.07
4ZG66Z		3	1953	0	1	0	0	1925.8	0.95	-0.02	-0.05	0	1970.75	1880.85	2981.59	0.88	-0.05
ibeQr9	1	1	1955	0	1	0	0	1897	0.95	-0.02	-0.02	-0.02	1762.26	2025	2133.28	0.92	-0.04
eHobnY	1	1	1961	0	1	0	0	1893.62	0.95	-0.02	-0.02	-0.03	1892.95	1894.41	1507.51	0.97	-0.01
Dkt7K6	1	1	1971	0	1	0	0	1808.69	0.95	-0.02	-0.02	-0.02	1804	1813.63	2697.58	0.89	-0.05
YPzvmZ	1	1	1949	0	1	0	0	1482.95	0.95	-0.02	-0.05	0	1594.11	1377.35	2327.3	0.84	-0.08
MhWcob	1	1	1957	0	1	0	0	2325.53	0.94	-0.02	-0.02	-0.02	2144.9	2506.15	1708.28	0.9	-0.05
utPYpu	1	1	1975	0	1	0	0	2234.18	0.94	-0.02	-0.03	-0.02	2522.5	1930.68	2912.3	0.95	-0.02
ciadPo	1	1	1960	0	1	0	0	1775.1	0.94	-0.02	0	-0.05	1778.75	1771.26	1236.3	0.9	-0.05
i5iNji	1	1	1977	0	1	0	0	2376.25	0.94	-0.03	-0.05	0	2373.7	2378.8	2708.83	0.95	-0.02
LWIT84	1	1	1990	0	1	0	0	1867.98	0.94	-0.03	-0.05	0	1685.9	2050.05	1720.68	0.88	-0.06
cHoWXQ		1	1974	0	1	0	0	2568.53	0.93	-0.03	-0.07	0	2670	2467.05	2215.43	0.93	-0.03
GO2UHZ	0	1	1983	0	1	0	0	2313.68	0.93	-0.03	-0.02	-0.05	2405.4	2221.95	2888.08	0.91	-0.04
L78wmV	0	1	1965	0	1	0	0	2274.55	0.93	-0.03	-0.07	0	2125.65	2423.45	2484.4	0.83	-0.08
mydGRL	1	1	1978	0	1	0	0	2180.45	0.93	-0.03	-0.05	-0.02	1998.4	2362.5	1710.15	0.75	-0.12
CE9Fal	1	1	1964	0	1	0	0	2126.85	0.93	-0.03	-0.02	-0.05	2067.85	2185.85	2618.59	0.92	-0.04
ccJ2S3	1	1	1986	0	1	0	0	2092.13	0.93	-0.03	-0.07	0	2291.45	1892.8	2746.45	1	0
zRiTBa	1	1	1947	0	1	0	0	1942.25	0.93	-0.03	-0.07	0	1875.95	2008.55	1619.23	0.78	-0.11
irUnuM	0	1	1964	0	1	0	0	1913.63	0.93	-0.03	-0.05	-0.02	1803.8	2023.45	2523.62	0.97	-0.01
NsJPOf	0	1	1995	0	1	0	0	1912.83	0.93	-0.03	-0.07	0	1874.45	1951.2	2607.33	0.76	-0.12
hGrqwT	0	1	1958	0	1	0	0	1866.88	0.93	-0.03	-0.07	0	2025.6	1708.15	2638.62	0.62	-0.21
QXNkMG	1	1	1984	0	1	0	0	1826.8	0.93	-0.03	-0.05	-0.02	1841.85	1811.75	1294.28	0.98	-0.01
g188Ap	1	2	1985	0	1	0	0	1760.1	0.93	-0.03	-0.05	-0.02	1708.85	1811.35	2292.95	0.82	-0.09
zOxWfd	1	1	1985	0	1	0	0	1743	0.93	-0.03	-0.05	-0.02	1845.35	1640.65	2840.2	0.89	-0.05
39wfWd	1	3	1978	0	1	0	0	1739.65	0.93	-0.03	-0.02	-0.05	1638.15	1841.15	1705.68	0.98	-0.01
eyI99R	1	1	1984	0	1	0	0	1730.6	0.93	-0.03	-0.07	0	1743.9	1717.3	1733.13	1	0
37Vl23	1	1	1973	0	1	0	0	1730.25	0.93	-0.03	-0.02	-0.05	1879.25	1581.25	1713.9	0.95	-0.02
W8hdYX	0	1	1972	0	1	0	0	1727.8	0.93	-0.03	-0.07	0	1811.25	1644.35	2212.85	0.93	-0.03
dUqLPN		1	1976	0	1	0	0	1725.45	0.93	-0.03	-0.02	-0.05	1999.35	1451.55	1677.7	0.95	-0.02
39RTfX	1	1	1951	0	1	0	0	1718.35	0.93	-0.03	-0.07	0	1876.6	1560.1	1469.4	0.98	-0.01
w8FdQJ	1	1	1966	0	1	0	0	1712.18	0.93	-0.03	-0.07	0	1588.55	1835.8	2433.37	0.97	-0.01
VkNP77	1	1	1989	0	1	0	0	1705.28	0.93	-0.03	-0.05	-0.02	1708.75	1701.8	1986.18	0.82	-0.09
BBtZYT	1	1	1973	0	1	0	0	1684.73	0.93	-0.03	-0.05	-0.02	1662	1707.45	2696.82	0.95	-0.02
HV5O2T	0	1	1981	0	1	0	0	1656.03	0.93	-0.03	-0.05	-0.02	1796.85	1515.2	2405.08	0.89	-0.05
9g6Zpz	0	1	1956	0	1	0	0	1645.73	0.93	-0.03	-0.02	-0.05	1784.45	1507	2074.2	0.85	-0.07
zfKrZk	1	1	1968	0	1	0	0	1630.3	0.93	-0.03	-0.05	-0.02	1915.65	1344.95	2309.31	0.89	-0.05
XJmuzw	0	1	1973	0	1	0	0	1629.68	0.93	-0.03	-0.07	0	1833.55	1425.8	2172.78	0.98	-0.01
mM1Zj2	0	1	1972	0	1	0	0	1627.25	0.93	-0.03	-0.05	-0.02	1767.85	1486.65	1494.45	0.75	-0.12
g3j3Y3	1	1	1959	0	1	0	0	1589.35	0.93	-0.03	-0.07	0	1800.15	1378.55	1929.56	0.94	-0.02
AoSd4r	1	1	1962	0	1	0	0	1582.38	0.93	-0.03	-0.05	-0.02	1671.7	1493.05	1851.35	0.88	-0.06
aORV8c	1	1	1962	0	1	0	0	1579.15	0.93	-0.03	-0.07	0	1699.25	1459.05	2371.33	0.9	-0.05
2tj7Bu	1	1	1981	0	1	0	0	1576.28	0.93	-0.03	-0.05	-0.02	1488.25	1664.3	2168.75	0.98	-0.01
InNbug	1	1	1966	0	1	0	0	1575.18	0.93	-0.03	-0.05	-0.02	1662.95	1487.4	1879.8	0.95	-0.02
BeU2F8	1	1	1978	0	1	0	0	1568.55	0.93	-0.03	0	-0.07	1509	1628.1	1498.78	0.88	-0.06
JoUL3j	1	1	1949	0	1	0	0	1563.38	0.93	-0.03	-0.05	-0.02	1499.4	1627.35	1239.65	0.83	-0.08
sfD3Xm	0	1	1963	0	1	0	0	1561.8	0.93	-0.03	-0.05	-0.02	1587.65	1535.95	1888.95	0.95	-0.02
CeOaGS	0	1	1979	0	1	0	0	1556.25	0.93	-0.03	-0.07	0	1557.8	1554.7	1960.62	0.92	-0.04
WMkst7	1	3	1964	0	1	0	0	1548.38	0.93	-0.03	-0.07	0	1629.9	1466.85	1927.3	0.83	-0.08
ji7XX1	0	2	1969	0	1	0	0	1540.45	0.93	-0.03	-0.07	0	1474.95	1605.95	1676.05	0.95	-0.02
9YCAd3	1	1	1974	0	1	0	0	1533.95	0.93	-0.03	-0.05	-0.02	1457.85	1610.05	1624.95	0.74	-0.13
lWNlD0	1	2	1952	0	1	0	0	1533.03	0.93	-0.03	-0.07	0	1523.95	1542.1	2273.56	0.82	-0.09
iDBpzk	0	1	1957	0	1	0	0	1522.7	0.93	-0.03	-0.07	0	1628.85	1416.55	2202.43	0.89	-0.05
R1kfRj	1	1	1960	0	1	0	0	1520.3	0.93	-0.03	-0.05	-0.02	1601.95	1438.65	1928.08	0.66	-0.18
cyh0cy	0	1	1965	0	1	0	0	1505.1	0.93	-0.03	0	-0.07	1553.85	1456.35	1994.64	0.74	-0.13
TnmdCW	0	1	1942	0	1	0	0	1502.8	0.93	-0.03	-0.02	-0.05	1571.2	1434.4	1890.1	0.87	-0.06
yWjAht		1	1987	0	1	0	0	1492.78	0.93	-0.03	-0.02	-0.05	1289.4	1696.15	2140.45	0.88	-0.06
UuIKoQ	1		1964	0	1	0	0	1486.3	0.93	-0.03	-0.07	0	1535.65	1436.95	2381.08	0.92	-0.04
bthPCj	1	1	1979	0	1	0	0	1481.3	0.93	-0.03	-0.05	-0.02	1569.6	1393	2095.33	0.95	-0.02
A20eIC	0	1	1982	0	1	0	0	1444.25	0.93	-0.03	-0.05	-0.02	1560.2	1328.3	2179.78	0.92	-0.03
CPJs8v	0	2	1977	0	1	0	0	1434.83	0.93	-0.03	-0.05	-0.02	1451.25	1418.4	1929	0.9	-0.05
sGvng8	1	1	1982	0	1	0	0	1406.58	0.93	-0.03	-0.02	-0.05	1296	1517.15	1861.73	0.9	-0.05
usuqR0	1	1	1953	0	1	0	0	1382.5	0.93	-0.03	-0.05	-0.02	1410.2	1354.8	1229.7	0.9	-0.05
FuwVIB	1	1	1957	0	1	0	0	1371.2	0.93	-0.03	-0.07	0	1398.45	1343.95	2248.68	0.74	-0.13
777wQt	1	1	1972	0	1	0	0	1364.43	0.93	-0.03	-0.05	-0.02	1403.15	1325.7	1781.05	0.95	-0.02
GofbhK	1	1	1982	0	1	0	0	1344.95	0.93	-0.03	-0.05	-0.02	1242.95	1446.95	2110.53	0.95	-0.02
Zqk6St	1	1	1977	0	1	0	0	1341.5	0.93	-0.03	-0.05	-0.02	1397.4	1285.6	1914.48	0.95	-0.02
6JZWZ0	0	1	1988	0	1	0	0	1324.38	0.93	-0.03	-0.05	-0.02	1184.25	1464.5	2208.58	0.86	-0.06
XBBLo4	1	1	1989	0	1	0	0	1315.95	0.93	-0.03	-0.05	-0.02	1401.45	1230.45	2155.05	0.97	-0.01
iQ1OR9	1	1	1986	0	1	0	0	1313.73	0.93	-0.03	-0.05	-0.02	1311.75	1315.7	1655.95	0.75	-0.12
QmcNSJ	1	1	1954	0	1	0	0	1306.78	0.93	-0.03	-0.02	-0.05	1311.8	1301.75	3009.64	0.94	-0.03
AUNP7B	1	1	1962	0	1	0	0	1304.55	0.93	-0.03	-0.05	-0.02	1434.3	1174.8	2071.62	0.97	-0.01
k0iEuC	1	1	1988	0	1	0	0	1299.18	0.93	-0.03	-0.07	0	1317.35	1281	1445.7	0.85	-0.07
iGh248	1	1	1971	0	1	0	0	1298.15	0.93	-0.03	-0.07	0	1417.1	1179.2	1781.7	0.95	-0.02
dKFxK2		1	1968	0	1	0	0	1287.7	0.93	-0.03	-0.02	-0.05	1372.4	1203	1730.43	0.88	-0.06
64B6Dc	1	1	1984	0	1	0	0	1275.83	0.93	-0.03	-0.07	0	1296.95	1254.7	1838.2	0.86	-0.06
BgsVkx	1	1	1969	0	1	0	0	1271.85	0.93	-0.03	-0.02	-0.05	1201.65	1342.05	1439.85	0.95	-0.02
dO6UXc	1	1	1983	0	1	0	0	1265.48	0.93	-0.03	-0.02	-0.05	1142.5	1388.45	1463.2	0.93	-0.03
H9M9ML	0	1	1979	0	1	0	0	1245.15	0.93	-0.03	-0.07	0	1160.6	1329.7	2293.88	0.92	-0.03
RzxNzp	1	1	1967	0	1	0	0	1235.88	0.93	-0.03	-0.05	-0.02	1301.8	1169.95	1380.38	0.87	-0.06
5TqSEn	1	1	1980	0	1	0	0	1229.45	0.93	-0.03	-0.05	-0.02	1414.7	1044.2	2343.92	0.84	-0.08
s88KSJ	1	2	1964	0	1	0	0	1228.55	0.93	-0.03	-0.07	0	1269.35	1187.75	1925.08	0.85	-0.07
AUykqV	0	1	1976	0	1	0	0	1217.03	0.93	-0.03	-0.05	-0.02	1258.05	1176	2005.23	0.95	-0.02
fchKqG	1	1	1972	0	1	0	0	1215.18	0.93	-0.03	-0.07	0	1245.05	1185.3	1837.75	0.98	-0.01
tEqIjH	0	1	1977	0	1	0	0	1212.4	0.93	-0.03	-0.05	-0.02	1160.05	1264.75	1433.55	0.98	-0.01
qjvUVq	0	1	1965	0	1	0	0	1210.38	0.93	-0.03	-0.07	0	1270.05	1150.7	2211.33	0.92	-0.04
6Mrl7j	0	1	1983	0	1	0	0	1194.18	0.93	-0.03	-0.07	0	1303.85	1084.5	1215.98	0.73	-0.14
eKiMGG	1	1	1976	0	1	0	0	1154.4	0.93	-0.03	-0.02	-0.05	1187.3	1121.5	1567.54	0.79	-0.1
IcWrhP	0	1	1979	0	1	0	0	1146.55	0.93	-0.03	-0.07	0	1222.9	1070.2	2112.44	0.89	-0.05
IJ9g7m	1	1	1980	0	1	0	0	1140.33	0.93	-0.03	-0.05	-0.02	1220.9	1059.75	1564.9	0.97	-0.01
QGmdQs	1	2	1981	0	1	0	0	1139.48	0.93	-0.03	-0.07	0	1156.25	1122.7	2424.33	1	0
0TCpxr	0	1	1972	0	1	0	0	1103.33	0.93	-0.03	-0.02	-0.05	1204.05	1002.6	1360	0.95	-0.02
Ax5Qy3	0	1	1977	0	1	0	0	1101.05	0.93	-0.03	-0.07	0	1067.85	1134.25	1458.98	1	0
A1MJDT	1	2	1968	0	1	0	0	1086.7	0.93	-0.03	-0.05	-0.02	1125.3	1048.1	1645.2	0.98	-0.01
deCPoo	0	1	1989	0	1	0	0	1084	0.93	-0.03	-0.02	-0.05	1131.45	1036.55	1381.08	1	0
HyOTiK	1	1	1983	0	1	0	0	1083.93	0.93	-0.03	-0.05	-0.02	1196.2	971.65	1520.75	0.98	-0.01
osQ1Da	0	1	1955	0	1	0	0	1071.68	0.93	-0.03	-0.05	-0.02	1124.8	1018.55	1403.88	0.85	-0.07
b3ysSn		2	1987	0	1	0	0	1046.93	0.93	-0.03	-0.07	0	1138.55	955.3	1794.63	0.98	-0.01
HrcAm7	1	1	1983	0	1	0	0	1045.88	0.93	-0.03	-0.05	-0.02	1000.9	1090.85	1938.56	0.89	-0.05
d8P5x6	1	1	1977	0	1	0	0	1045.25	0.93	-0.03	-0.05	-0.02	1095.4	995.1	1731.95	0.9	-0.05
azDh94	1	1	1979	0	1	0	0	1035.25	0.93	-0.03	-0.02	-0.05	1121.8	948.7	1357.15	0.9	-0.05
D7CctI	1	1	1969	0	1	0	0	1032.28	0.93	-0.03	-0.07	0	1078	986.55	2263	0.9	-0.05
Fc5BSi	1	1	1966	0	1	0	0	1017.53	0.93	-0.03	-0.05	-0.02	1014.75	1020.3	1485.95	0.93	-0.03
D94bQz	1	1	1964	0	1	0	0	1015.48	0.93	-0.03	-0.05	-0.02	1046.95	984	865.28	0.93	-0.03
9BIY5c	0	2	1975	0	1	0	0	1012.5	0.93	-0.03	-0.02	-0.05	1054.3	970.7	2223.48	0.9	-0.05
ujUet6	0	1	1975	0	1	0	0	1010.95	0.93	-0.03	-0.05	-0.02	960.2	1061.7	1359.38	0.98	-0.01
iBkNE1	1	1	1957	0	1	0	0	999.18	0.93	-0.03	-0.02	-0.05	1008.5	989.85	2256.21	0.97	-0.01
gscPwH	0	1	1984	0	1	0	0	969.9	0.93	-0.03	-0.02	-0.05	994.5	945.3	2393.13	0.93	-0.03
G5RWy5	1	1	1984	0	1	0	0	963.93	0.93	-0.03	-0.05	-0.02	1009.35	918.5	1072.73	1	0
Dyk4Ou	0	1	1984	0	1	0	0	956.15	0.93	-0.03	-0.05	-0.02	984.7	927.6	958.55	0.95	-0.02
RrWUX4	1	1	1980	0	1	0	0	949.7	0.93	-0.03	-0.05	-0.02	970.15	929.25	1182.33	1	0
FZOhY2	0	1	1983	0	1	0	0	903.7	0.93	-0.03	-0.05	-0.02	939.25	868.15	1712.28	0.85	-0.07
IkJxbU	1	1	1985	0	1	0	0	895.7	0.93	-0.03	-0.05	-0.02	953.95	837.45	1006.65	0.85	-0.07
z2B0sI	0	1	1962	0	1	0	0	857.75	0.93	-0.03	-0.05	-0.02	813.1	902.4	1168.3	1	0
rS8eOA	0	1	1985	0	1	0	0	2482.95	0.92	-0.03	-0.02	-0.05	2598.15	2367.75	2608.23	0.89	-0.05
eXSW4L	1	1	1963	0	1	0	0	2380.55	0.92	-0.03	-0.02	-0.05	2309.05	2452.05	2163.7	0.98	-0.01
64UWmh	1	1	1967	0	1	0	0	2338.55	0.92	-0.03	-0.05	-0.02	2208.55	2468.55	2325.08	0.9	-0.05
Klh96z	1	1	1953	0	1	0	0	2301.83	0.92	-0.03	-0.07	0	2507.5	2096.15	2545.56	0.89	-0.05
8g7O44	1	1	1976	0	1	0	0	2042.63	0.92	-0.03	-0.07	0	2192.2	1893.05	1849.65	0.98	-0.01
RexVs8	1	1	1988	0	1	0	0	1969.88	0.92	-0.03	-0.05	-0.02	1729.7	2210.05	2047.25	0.95	-0.02
bjxWH8	1	3	1985	0	1	0	0	1959.08	0.92	-0.03	-0.02	-0.05	1767.35	2150.8	1963.2	0.9	-0.05
1TuprT	1	1	1973	0	1	0	0	1758.6	0.92	-0.03	-0.05	-0.02	1819.8	1697.4	1826.59	0.97	-0.01
yDxLfq	1	1	1982	0	1	0	0	1725.2	0.92	-0.03	-0.05	-0.02	1840.4	1610	2783.08	0.86	-0.06
bjG2ma	1	1	1959	0	1	0	0	1610.6	0.92	-0.03	-0.05	-0.02	1641.15	1580.05	1937.38	0.76	-0.12
R7IOs5	1	1	1980	0	1	0	0	1568.48	0.92	-0.03	-0.07	0	1784.35	1352.6	2753.53	0.8	-0.1
1svSng	1	1	1952	2	1	0	0	1510.5	0.92	-0.03	-0.07	0	1682.65	1338.35	2025.92	0.86	-0.06
67EBOO	1	1	1969	0	1	0	0	1500.9	0.92	-0.03	-0.05	-0.02	1918.75	1083.05	1340.83	0.98	-0.01
FPWhfv	1	1	1957	0	1	0	0	1484.85	0.92	-0.03	-0.05	-0.02	1329.85	1639.85	1713.75	0.93	-0.03
xN8rJf	0	1	1967	0	1	0	0	1468.93	0.92	-0.03	-0.07	0	1646.7	1291.15	1897.6	0.98	-0.01
cjntMg	1	1	1973	0	1	0	0	1426.58	0.92	-0.03	-0.05	-0.02	1378.85	1474.3	1804.59	0.87	-0.06
kMO2fS	0	2	2000	0	1	0	0	1406.13	0.92	-0.03	-0.05	-0.02	1446.1	1366.15	3063.05	0.76	-0.12
1U9vr9	1	1	1985	0	1	0	0	1376.23	0.92	-0.03	-0.07	0	1294	1458.45	1654.79	0.97	-0.01
uQLoOT	1	1	1961	0	1	0	0	1348.03	0.92	-0.03	-0.05	-0.02	1483.2	1212.85	1603.73	0.82	-0.09
RgFt4D	1	1	1988	0	1	0	0	1202.23	0.92	-0.03	-0.05	-0.02	1285.26	1123.35	2562.92	0.89	-0.05
4Svh73	0	1	1976	0	1	0	0	897.74	0.92	-0.03	-0.02	-0.05	942.45	850.68	1207.05	0.77	-0.11
RxHhHS	1	1	1961	0	1	0	0	2789.08	0.92	-0.04	-0.05	-0.02	3034.9	2543.25	3196.18	0.77	-0.11
xm8hd2	1	1	1956	0	1	0	0	2025.72	0.92	-0.04	-0.05	-0.02	1997.16	2052.85	2680.45	0.75	-0.12
S1b4Yt	0	1	1975	0	1	0	0	1843.9	0.92	-0.04	-0.05	-0.02	1914.85	1769.21	1476.93	0.95	-0.02
jwLywN	1	1	1949	0	1	0	0	1817.72	0.92	-0.04	-0.07	0	1765	1867.8	2330.13	0.71	-0.15
pn1T06	1	1	1978	0	1	0	0	1788.79	0.92	-0.04	-0.05	-0.02	1709.95	1863.7	1850.55	0.85	-0.07
N5h03C	1	1	1964	0	1	0	0	1781.63	0.92	-0.04	-0.05	-0.02	1555.4	2007.85	2225.3	0.95	-0.02
KI4Aah	1	1	1992	0	1	0	0	1707.41	0.92	-0.04	-0.07	0	1794.45	1615.79	2073.15	0.85	-0.07
rUlw9Y	1	1	1988	0	1	0	0	1704.21	0.92	-0.04	-0.05	-0.02	1513.89	1885	2120.3	0.95	-0.02
f3g0WQ	0	1	1977	0	1	0	0	1597.13	0.92	-0.04	-0.05	-0.02	1539	1652.35	1692.75	0.74	-0.13
d0d6LF	1	1	1985	0	1	0	0	1543.05	0.92	-0.04	-0.07	0	1470.58	1611.9	1806.23	0.97	-0.01
e1vrwN		1	1975	0	1	0	0	1524.49	0.92	-0.04	-0.05	-0.02	1707.15	1332.21	2171.9	0.93	-0.03
X054mS	1	1	1952	0	1	0	0	1442.69	0.92	-0.04	-0.07	0	1644.05	1230.74	1869	0.9	-0.05
5fzFpE	0	1	1958	0	1	0	0	1306.36	0.92	-0.04	-0.07	0	1535.05	1065.63	2090.2	0.93	-0.03
G77akk	1	1	1986	0	1	0	0	2814.18	0.92	-0.04	-0.05	-0.02	2858.9	2767.11	1936.95	0.83	-0.08
6nUxQO		1	1968	0	1	0	0	1898.05	0.92	-0.04	-0.08	0	1898.68	1897.42	2277.61	0.78	-0.11
jlEMzg	1	1	1962	0	1	0	0	1852.63	0.92	-0.04	-0.05	-0.02	1678.9	2026.35	2424.8	0.89	-0.05
OzoEXh	1	1	1960	0	1	0	0	1609.54	0.92	-0.04	-0.05	-0.02	1773.37	1453.9	2678.85	0.76	-0.12
ptP1ZI	1	1	1966	0	1	0	0	2219.41	0.92	-0.04	-0.05	-0.02	2079	2367.21	3082.87	0.88	-0.05
lwfehZ		1	1986	0	1	0	0	2092.9	0.92	-0.04	-0.07	0	2033.75	2155.16	1893.03	1	0
R1QG2p	1	1	1988	0	1	0	0	2015.56	0.92	-0.04	-0.05	-0.02	1865.95	2157.7	2372.1	0.91	-0.04
ODHglJ	1	1	1986	0	1	0	0	2695.38	0.91	-0.04	-0.03	-0.05	2789.16	2606.3	3046.58	0.72	-0.14
ylOay1	1	1	1979	0	1	0	0	3688.63	0.9	-0.04	-0.09	0	3614.75	3762.5	3072.33	0.7	-0.15
Vyu4kM	1	1	1979	0	1	0	0	2708.13	0.9	-0.05	-0.07	-0.02	2825.65	2590.6	2735.13	0.92	-0.03
xgC8vH	0	1	1956	0	1	0	0	2460	0.9	-0.05	0	-0.08	2173.4	2698.83	2771.95	0.78	-0.11
PHqctL		3	1971	0	1	0	0	2311.05	0.9	-0.05	-0.07	-0.02	2003.4	2618.7	2421.43	0.82	-0.09
VzBA0i	0	2	1975	0	1	0	0	2200.4	0.9	-0.05	-0.05	-0.05	2008.75	2392.05	2458.51	0.97	-0.01
DvSNOW	0	1	1961	0	1	0	0	2036.63	0.9	-0.05	-0.02	-0.07	1895.15	2178.1	1952.75	0.75	-0.12
ya4Y7f	1	1	1988	0	1	0	0	2001.45	0.9	-0.05	-0.05	-0.05	1946.65	2056.25	2075.13	0.83	-0.08
EpsoK7	1	1	1960	0	1	0	0	1960.18	0.9	-0.05	-0.05	-0.05	1927.8	1992.55	2943.36	0.84	-0.08
6JVKM7	1	1	1954	0	1	0	0	1960.05	0.9	-0.05	-0.05	-0.05	2023.35	1896.75	2242.55	0.9	-0.05
F1UMFw	1	2	1976	0	1	0	0	1946.9	0.9	-0.05	-0.07	-0.02	1755.75	2138.05	3046.83	0.78	-0.11
C3Qfzp	1	1	1981	0	1	0	0	1892.93	0.9	-0.05	-0.07	-0.02	1851.45	1934.4	2311.63	0.72	-0.14
CxhB5E	1	1	1951	0	1	0	0	1892.2	0.9	-0.05	-0.05	-0.05	1925.2	1859.2	2715.41	0.81	-0.09
N6eL2k	1	1	1963	0	1	0	0	1810.38	0.9	-0.05	-0.07	-0.02	1772.65	1848.1	1843.83	0.93	-0.03
4mgG8P	0	3	1990	0	1	0	0	1775.35	0.9	-0.05	-0.07	-0.02	1599.65	1951.05	3136.79	0.81	-0.09
BKbKsS	0	1	1975	0	1	0	0	1771.45	0.9	-0.05	-0.05	-0.05	1549.8	1993.1	2393.92	0.83	-0.08
bmouK9	1	1	1971	0	1	0	0	1760.88	0.9	-0.05	-0.05	-0.05	1756.65	1765.1	1287.4	0.95	-0.02
BerRgD	1	1	1954	0	1	0	0	1752.68	0.9	-0.05	-0.07	-0.02	1872.5	1632.85	2148.59	0.95	-0.02
MdKlBj	1	1	1950	0	1	0	0	1751.53	0.9	-0.05	-0.07	-0.02	1884.55	1618.5	2875.58	0.95	-0.02
bNEPFg	0	1	1985	0	1	0	0	1742.63	0.9	-0.05	-0.07	-0.02	1731.55	1753.7	1959.2	0.78	-0.11
MSZBWr	1	1	1987	0	1	0	0	1706.93	0.9	-0.05	-0.07	-0.02	1854.45	1559.4	2312.25	0.93	-0.03
3vRisV	1	1	1983	0	1	0	0	1705.48	0.9	-0.05	-0.05	-0.05	1791.45	1619.5	1776.58	0.93	-0.03
DgMOdA	1	1	1984	0	1	0	0	1690.05	0.9	-0.05	-0.07	-0.02	1789.4	1590.7	2313.18	0.82	-0.09
95jrRr	0	1	1982	0	1	0	0	1671.95	0.9	-0.05	-0.1	0	1595.8	1748.1	1706.95	0.95	-0.02
S3g8kG	1	2	1969	0	1	0	0	1667.3	0.9	-0.05	-0.05	-0.05	1743.85	1590.75	1681.65	0.88	-0.06
kZOnRu	1	1	1965	0	1	0	0	1661.4	0.9	-0.05	-0.05	-0.05	1673.4	1649.4	1918.25	0.83	-0.08
iNa7Ed	1	1	1976	0	1	0	0	1642.43	0.9	-0.05	-0.02	-0.07	1735.85	1549	1802.43	0.9	-0.05
J5Psf6	1	2	1942	0	1	0	0	1637.45	0.9	-0.05	-0.05	-0.05	1621.75	1653.15	1568.63	0.98	-0.01
4Tg0S8	0	2	1978	0	1	0	0	1630.08	0.9	-0.05	-0.07	-0.02	1959	1301.15	2157.13	0.87	-0.06
PZszrR	1	1	1949	0	1	0	0	1628.53	0.9	-0.05	-0.05	-0.05	1656.6	1600.45	1514.98	0.88	-0.06
EesPI7	1	1	2008	0	1	0	0	1619.75	0.9	-0.05	-0.07	-0.02	1347.4	1892.1	1614.68	1	0
Qojd59	1	1	1958	0	1	0	0	1617.18	0.9	-0.05	-0.05	-0.05	1546.95	1687.4	1969.53	0.9	-0.05
ByUvoc	1	1	1988	0	1	0	0	1609.95	0.9	-0.05	-0.05	-0.05	1619.45	1600.45	2434.38	0.78	-0.11
x0kn8V	1	1	1978	0	1	0	0	1592.2	0.9	-0.05	-0.1	0	1607.2	1577.2	2017.53	0.74	-0.13
sezcwb	0	1	1998	0	1	0	0	1564.7	0.9	-0.05	-0.05	-0.05	1532.8	1596.6	2372.55	0.92	-0.03
qZcDP4	1	1	1964	0	1	0	0	1552.65	0.9	-0.05	-0.02	-0.07	1564.75	1540.55	1785.95	0.93	-0.03
w1Fdik	1	1	1958	0	1	0	0	1545.2	0.9	-0.05	-0.05	-0.05	1608.5	1481.9	2169.23	0.72	-0.14
VVAI1z	0	1	1966	0	1	0	0	1543.85	0.9	-0.05	-0.07	-0.02	1484.05	1603.65	1759.58	0.75	-0.12
R4IXzd	1	1	1962	0	1	0	0	1540.73	0.9	-0.05	-0.1	0	1546.55	1534.9	1957.65	0.9	-0.05
DynIVU	1	1	1978	0	1	0	0	1523.1	0.9	-0.05	-0.1	0	1478.45	1567.75	2546.08	0.92	-0.04
VFZs2V	1	1	1956	0	1	0	0	1515.15	0.9	-0.05	-0.1	0	1567.1	1463.2	1655.05	0.78	-0.11
IgDUA9	0	1	1978	0	1	0	0	1509.03	0.9	-0.05	-0.07	-0.02	1347.6	1670.45	1293.1	0.95	-0.02
tyvk36	0	1	1941	0	1	0	0	1505.4	0.9	-0.05	-0.1	0	1500.2	1510.6	1561.75	1	0
XSLz3t	1	1	1963	0	1	0	0	1485.48	0.9	-0.05	-0.02	-0.07	1406.5	1564.45	2155.15	0.95	-0.02
oSYCOC		1	1956	0	1	0	0	1482.78	0.9	-0.05	-0.02	-0.07	1581.95	1383.6	2007.88	0.83	-0.08
snlRkP	1	1	1981	0	1	0	0	1481.33	0.9	-0.05	-0.07	-0.02	1554.8	1407.85	2053.28	0.74	-0.13
Bb6igu	1	2	1973	0	1	0	0	1478.18	0.9	-0.05	0	-0.1	1435.6	1520.75	2496.84	0.94	-0.02
MYUvLL	1	1	1978	0	1	0	0	1462.03	0.9	-0.05	-0.07	-0.02	1520.85	1403.2	2047.63	0.82	-0.09
9CwX03	0	1	1955	0	1	0	0	1450.68	0.9	-0.05	-0.05	-0.05	1523.3	1378.05	1768.98	0.73	-0.14
m23isS	1	1	1988	0	1	0	0	1401.95	0.9	-0.05	-0.07	-0.02	1465.85	1338.05	1847.56	0.92	-0.03
xONQiI	0	1	1975	0	1	0	0	1361.28	0.9	-0.05	-0.07	-0.02	1378.2	1344.35	1886.8	0.97	-0.01
Z2SEED	1	1	1987	0	1	0	0	1340.5	0.9	-0.05	-0.07	-0.02	1434.3	1246.7	2051.97	0.97	-0.01
0A9zcV	1	1	1978	0	1	0	0	1326.43	0.9	-0.05	-0.1	0	1355.35	1297.5	1379.58	0.98	-0.01
3UEdvG	1	1	1978	0	1	0	0	1294.18	0.9	-0.05	-0.07	-0.02	1306.7	1281.65	1868.23	0.95	-0.02
Bud0XW	0	1	1956	0	1	0	0	1274.5	0.9	-0.05	-0.07	-0.02	1352.55	1196.45	2353.23	0.97	-0.01
Xcv2DR	1	1	1960	0	1	0	0	1271.1	0.9	-0.05	-0.07	-0.02	1332.8	1209.4	2125.33	0.9	-0.05
bKYCGX	1	1	1964	0	1	0	0	1268.3	0.9	-0.05	-0.07	-0.02	1435.95	1100.65	2336.44	0.84	-0.07
DFupj0	1	2	1983	0	1	0	0	1249.28	0.9	-0.05	-0.07	-0.02	1277	1221.55	2300.3	0.89	-0.05
0fnyxu	0	1	1994	0	1	0	0	1233.2	0.9	-0.05	-0.07	-0.02	1252.1	1214.3	2451.23	0.86	-0.06
0YrWM5	0	2	1974	0	1	0	0	1218	0.9	-0.05	-0.02	-0.07	1149.95	1286.05	2019.78	0.88	-0.06
P119FI	1	1	1984	0	1	0	0	1204.43	0.9	-0.05	-0.05	-0.05	1132	1276.85	2715.8	0.84	-0.07
p5oj2R		1	1974	0	1	0	0	1204.25	0.9	-0.05	-0.05	-0.05	1101.3	1307.2	1453.28	0.98	-0.01
AvcUrr	0	2	1977	0	1	0	0	1181.38	0.9	-0.05	-0.07	-0.02	1097.15	1265.6	1192.63	0.93	-0.03
HWmHzB	1	1	1967	0	1	0	0	1170.88	0.9	-0.05	-0.1	0	1332.4	1009.35	1676.9	0.87	-0.06
4PWsmu	0	1	1980	0	1	0	0	1162.63	0.9	-0.05	-0.05	-0.05	1165.8	1159.45	1253.1	0.98	-0.01
4aTRxp	0	1	1974	0	1	0	0	1153.85	0.9	-0.05	-0.05	-0.05	1193	1114.7	1181.65	0.98	-0.01
CAibbY	1	1	1973	0	1	0	0	1153.38	0.9	-0.05	-0.07	-0.02	1038.8	1267.95	1301.38	0.85	-0.07
qrReab	1	1	1986	0	1	0	0	1148.75	0.9	-0.05	-0.05	-0.05	1178.5	1119	2043.38	0.82	-0.09
4FOhB4	0	1	1972	0	1	0	0	1128.93	0.9	-0.05	-0.07	-0.02	1169.6	1088.25	1225.05	0.95	-0.02
5nwH42	0	1	1986	0	1	0	0	1120.83	0.9	-0.05	-0.05	-0.05	1068.45	1173.2	2215.21	0.95	-0.02
DXcGpu	1	1	1981	0	1	0	0	1096.7	0.9	-0.05	-0.07	-0.02	1085.9	1107.5	1281.78	0.95	-0.02
R4SN8Q	1	1	1987	0	1	0	0	1093.15	0.9	-0.05	-0.1	0	1118.5	1067.8	1408.03	0.95	-0.02
po3oaF	0	1	1982	0	1	0	0	1056.83	0.9	-0.05	-0.05	-0.05	1134.4	979.25	2066.58	0.89	-0.05
Myhbgv	0	1	1983	0	1	0	0	1056.05	0.9	-0.05	-0.05	-0.05	1067.7	1044.4	2228.9	0.86	-0.06
iQWFfI	1	1	1985	0	1	0	0	1045.43	0.9	-0.05	-0.07	-0.02	1049.6	1041.25	1449.3	0.88	-0.06
4dhEcn	0	1	1981	0	1	0	0	1018.88	0.9	-0.05	-0.07	-0.02	1021.2	1016.55	1436	1	0
AyD7nx	1	1	1982	0	1	0	0	1017.8	0.9	-0.05	-0.1	0	1095.85	939.75	1557.55	0.85	-0.07
u5Glxs	0	1	1982	0	1	0	0	1005.63	0.9	-0.05	-0.05	-0.05	1129.9	881.35	977.35	0.9	-0.05
zhsnu2	1	1	1953	0	1	0	0	987.95	0.9	-0.05	-0.1	0	1037.55	938.35	1177.65	0.95	-0.02
9c9IBt	0	1	1987	0	1	0	0	981.7	0.9	-0.05	-0.07	-0.02	954	1009.4	1815.98	0.85	-0.07
hBBa4F	1	1	1989	0	1	0	0	946.68	0.9	-0.05	-0.07	-0.02	967.6	925.75	1372.33	0.95	-0.02
sYyZBq	1	2	1983	0	1	0	0	913.13	0.9	-0.05	-0.07	-0.02	914.5	911.75	1150.9	0.65	-0.19
21Osyu	0	1	1979	0	1	0	0	794.5	0.9	-0.05	-0.07	-0.02	814.6	774.4	961.93	0.93	-0.03
y0ayQP	1	1	1974	0	1	0	0	2281.6	0.9	-0.05	-0.07	-0.02	2527.7	2035.5	2130.08	0.92	-0.03
UkmQV7	0	1	1927	0	1	0	0	2221.53	0.9	-0.05	-0.02	-0.07	2405.45	2037.6	1476.93	1	0
I2G6Fr	0	1	1985	0	1	0	0	2141.45	0.9	-0.05	-0.02	-0.07	2127.65	2155.25	2554.15	0.97	-0.01
uKYhD6	1	2	1959	0	1	0	0	1809.7	0.9	-0.05	-0.05	-0.05	1627.55	1991.85	2558.74	0.8	-0.1
IPFHSD	0		1982	0	1	0	0	1782.45	0.9	-0.05	-0.07	-0.02	1663.25	1901.65	1697.77	1	0
hZRiro	1	1	1933	0	1	0	0	1772.3	0.9	-0.05	-0.1	0	2007.05	1537.55	2791.97	0.74	-0.13
66J09u	1	1	1967	0	1	0	0	1736.05	0.9	-0.05	-0.05	-0.05	1528.35	1943.75	1716	0.95	-0.02
D6AC9k	1	3	1949	0	1	0	0	1493.05	0.9	-0.05	-0.07	-0.02	1659.55	1326.55	1562.13	0.95	-0.02
cUg7Do	0	1	1964	0	1	0	0	1350.5	0.9	-0.05	-0.07	-0.02	1615.2	1085.8	2072.58	0.97	-0.01
YAjIRC	0	1	1951	0	1	0	0	2534.95	0.89	-0.05	-0.07	-0.02	2457.1	2616.89	2373.05	0.95	-0.02
KW0oTl	0	1	1955	0	1	0	0	2212.85	0.89	-0.05	-0.07	-0.02	2074.7	2358.26	2630.77	0.92	-0.04
QIWiC4	1	1	1981	0	1	0	0	1937.54	0.89	-0.05	-0.07	-0.02	1947.7	1926.84	1640.38	0.88	-0.06
wJomfn	1	1	1991	0	1	0	0	1896.36	0.89	-0.05	-0.07	-0.02	1934.5	1856.21	2259.23	0.95	-0.02
aeBNBq	1	2	1976	0	1	0	0	1784.51	0.89	-0.05	-0.05	-0.05	1712.95	1852.5	3067.13	0.94	-0.03
dxn2TU	0	1	1968	0	1	0	0	1781.62	0.89	-0.05	-0.05	-0.05	1540.21	2010.95	1584.33	0.97	-0.01
j4DEAq	0	1	1963	0	1	0	0	1691.59	0.89	-0.05	-0.05	-0.05	1776.1	1602.63	2331.95	0.78	-0.11
ev87h5	1	1	1945	0	1	0	0	1463.98	0.89	-0.05	-0.05	-0.05	1446.75	1481.2	1918.38	0.85	-0.07
k9vy0c	1	1	1958	0	1	0	0	1361.36	0.89	-0.05	-0.05	-0.05	1593.16	1141.15	1521.45	0.93	-0.03
C4htwU	1	1	1966	0	1	0	0	2627.54	0.89	-0.05	-0.02	-0.07	2761.37	2500.4	2046.85	0.87	-0.06
z3IaLY	1	1	1966	0	1	0	0	2465.62	0.89	-0.05	-0.08	-0.02	2432.32	2497.25	1745.68	0.88	-0.06
DpsMbM	1	1	1982	0	1	0	0	2152.93	0.89	-0.05	-0.07	-0.02	2161.65	2144.2	1588.55	0.9	-0.05
sBVzLD	0	1	1960	0	1	0	0	1740.03	0.89	-0.05	-0.05	-0.05	1698.53	1779.45	1777.93	0.83	-0.08
OtCqFo	0	1	1930	0	1	0	0	2293.56	0.89	-0.05	-0.05	-0.05	2478.3	2099.11	2384.95	0.82	-0.09
yoPzdU	0	1	1972	0	1	0	0	2061.89	0.89	-0.05	0	-0.1	1052.75	2869.2	1856.33	1	0
gXXq2u	1	1	1988	0	1	0	0	2025.35	0.89	-0.05	-0.05	-0.05	1857.6	2193.1	2275.68	0.97	-0.01
5Ts0NS	1	1	1979	0	1	0	0	1999.03	0.89	-0.05	-0.08	-0.02	2017.39	1982.5	2066.87	0.76	-0.12
xdXiIc	1		1974	0	1	0	0	2866.46	0.89	-0.05	-0.05	-0.05	2881.79	2851.9	2390.08	0.88	-0.06
pDk2vG	1	1	1991	0	1	0	0	2658	0.89	-0.05	-0.05	-0.06	2148.6	3194.21	2647.21	0.95	-0.02
GmJnEO	1	1	1986	0	1	0	0	2574.37	0.89	-0.05	-0.08	-0.03	2688.6	2447.44	2366.13	0.85	-0.07
D8FZRM	0	2	1930	0	1	0	0	2202.3	0.88	-0.06	-0.05	-0.07	2287.4	2117.2	3077.81	0.91	-0.04
sGcPqc		1	1955	0	1	0	0	2046.45	0.88	-0.06	-0.02	-0.1	1936.1	2156.8	2371.72	0.84	-0.07
RkBlm9	1	2	1979	0	1	0	0	2045.58	0.88	-0.06	-0.05	-0.07	1995.1	2096.05	2086.38	0.79	-0.1
bfdoSn	1	1	1977	0	1	0	0	1985.53	0.88	-0.06	-0.07	-0.05	1913.25	2057.8	2866.18	0.92	-0.04
d1a7Do	0	1	1950	0	1	0	0	1979.35	0.88	-0.06	-0.1	-0.02	2162.75	1795.95	2242.05	0.87	-0.06
0Y4dC9	1	1	1982	0	1	0	0	1940.25	0.88	-0.06	-0.1	-0.02	1867.25	2013.25	1540.23	0.9	-0.05
wt9LZp	0	2	1960	0	1	0	0	1855.48	0.88	-0.06	-0.07	-0.05	1937.35	1773.6	2134.48	0.9	-0.05
iCpsML	0	1	1970	0	1	0	0	1850	0.88	-0.06	-0.1	-0.02	2017.15	1682.85	3236.28	0.85	-0.07
PEUFNu	1	1	1987	0	1	0	0	1824.6	0.88	-0.06	-0.1	-0.02	1745.3	1903.9	1795.08	1	0
Es3osz	1	1	1984	0	1	0	0	1738.4	0.88	-0.06	-0.07	-0.05	1669.05	1807.75	1968.28	0.53	-0.28
3csSgv	1	1	1956	0	1	0	0	1683.95	0.88	-0.06	-0.1	-0.02	1944.6	1423.3	2208.73	0.8	-0.1
p72ukV	1	1	1950	0	1	0	0	1641.68	0.88	-0.06	-0.1	-0.02	1766.4	1516.95	2475.11	0.86	-0.06
hyWLFP	0	1	1980	0	1	0	0	1634.13	0.88	-0.06	-0.07	-0.05	1519.3	1748.95	2568.4	0.87	-0.06
KVO1XR	1	1	1964	0	1	0	0	1590.83	0.88	-0.06	-0.05	-0.07	1337.45	1844.2	1677.33	0.87	-0.06
u5rENd	1	1	1980	0	1	0	0	1562.35	0.88	-0.06	-0.12	0	1517.05	1607.65	2163.58	0.97	-0.01
kAfwSY	1	1	1981	0	1	0	0	1538.45	0.88	-0.06	-0.05	-0.07	1432.5	1644.4	1670.73	0.87	-0.06
jsVLTF	0	1	1982	0	1	0	0	1534.05	0.88	-0.06	-0.1	-0.02	1438.9	1629.2	2155.83	0.94	-0.03
iXbgwf	1	2	1990	0	1	0	0	1527.18	0.88	-0.06	-0.05	-0.07	1428.8	1625.55	2426.45	0.56	-0.25
L0UpPZ	1	1	1985	0	1	0	0	1520.95	0.88	-0.06	-0.07	-0.05	1561.9	1480	2237.59	0.97	-0.01
OJcCEl	0	1	1954	0	1	0	0	1510.08	0.88	-0.06	-0.1	-0.02	1634.35	1385.8	2581.25	0.85	-0.07
Xm11k3	1	1	1986	0	1	0	0	1469.1	0.88	-0.06	-0.1	-0.02	1620.25	1317.95	1988.28	0.82	-0.09
5bh0Dw	1	1	1969	0	1	0	0	1456.6	0.88	-0.06	-0.12	0	1541.35	1371.85	2464.4	0.97	-0.01
6sXjNP	1	1	1959	0	1	0	0	1432.4	0.88	-0.06	-0.12	0	1571.55	1293.25	1277.48	0.64	-0.19
K6fftE	0	2	1985	0	1	0	0	1390.18	0.88	-0.06	-0.07	-0.05	1377.3	1403.05	1917.46	0.89	-0.05
7BbVs8	0	2	1953	0	1	0	0	1387.33	0.88	-0.06	-0.07	-0.05	1342.25	1432.4	2165.77	0.97	-0.01
JO5g86	1	1	1987	0	1	0	0	1382.63	0.88	-0.06	-0.05	-0.07	1251.15	1514.1	1912.3	0.9	-0.05
gmWP56	1	2	1988	0	1	0	0	1363.1	0.88	-0.06	-0.02	-0.1	1394.65	1331.55	1356.35	0.88	-0.06
fuMTfJ	1	1	1986	0	1	0	0	1340.85	0.88	-0.06	-0.07	-0.05	1360.75	1320.95	1714.63	0.9	-0.05
UcWHSD	1	1	1967	0	1	0	0	1339	0.88	-0.06	-0.1	-0.02	1448	1230	2150.59	0.74	-0.13
j9J14v	1	1	1988	0	1	0	0	1324.28	0.88	-0.06	-0.07	-0.05	1177.3	1471.25	1789.7	0.9	-0.05
c6Ef8k	1	2	1974	0	1	0	0	1299.98	0.88	-0.06	-0.05	-0.07	1353.95	1246	1237.78	0.98	-0.01
WtPqk5	0	1	1973	0	1	0	0	1248.85	0.88	-0.06	-0.02	-0.1	1253	1244.7	1710.55	0.88	-0.06
CXIzRU	1	2	1977	0	1	0	0	1218.1	0.88	-0.06	-0.07	-0.05	1311	1125.2	1940.4	0.87	-0.06
grire4	0	2	1980	0	1	0	0	1184.75	0.88	-0.06	-0.07	-0.05	1196.1	1173.4	1893.35	0.93	-0.03
acI1tN	0	1	1960	0	1	0	0	1183.45	0.88	-0.06	-0.05	-0.07	1141.3	1225.6	1352.69	0.84	-0.07
4NiXBi	1	1	1946	0	1	0	0	1179.35	0.88	-0.06	-0.07	-0.05	1260.3	1098.4	1240.58	0.98	-0.01
r5BTKz	0	2	1968	0	1	0	0	1138.73	0.88	-0.06	-0.07	-0.05	1151.4	1126.05	1503.95	0.95	-0.02
9CzUMI	1		1968	0	1	0	0	1069.5	0.88	-0.06	-0.1	-0.02	1104.8	1034.2	1265.58	0.9	-0.05
ChWd77	0	1	1985	0	1	0	0	1053.88	0.88	-0.06	-0.1	-0.02	1031.05	1076.7	1419.98	0.82	-0.09
KT7dhe	1	1	1985	0	1	0	0	1053.75	0.88	-0.06	-0.1	-0.02	1150.45	957.05	1667.25	0.78	-0.11
YKZMcL	0	1	1987	0	1	0	0	992.18	0.88	-0.06	-0.1	-0.02	1051.3	933.05	1241.93	0.98	-0.01
u7Hovk	1	1	1980	0	1	0	0	991.43	0.88	-0.06	-0.07	-0.05	1022.75	960.1	1986.03	0.85	-0.07
lcFFmd	1	1	1959	0	1	0	0	2633.98	0.87	-0.06	-0.07	-0.05	2678.95	2589	2732.75	0.98	-0.01
a5tmV4	1	1	1979	0	1	0	0	2468.2	0.87	-0.06	-0.1	-0.02	2396.75	2539.65	2825.68	0.5	-0.3
svuNv4	1	2	1957	0	1	0	0	2175.2	0.87	-0.06	-0.1	-0.02	2144.2	2206.2	2626.15	0.97	-0.01
Tj7g4A	1	1	1975	0	1	0	0	2098.55	0.87	-0.06	-0.05	-0.07	1997.15	2199.95	2600.15	0.97	-0.01
kqKTec	0	1	1989	0	1	0	0	1977	0.87	-0.06	-0.07	-0.05	2040.6	1913.4	2201.25	0.97	-0.01
AmasHo	1	1	1954	0	1	0	0	1394.1	0.87	-0.06	-0.07	-0.05	1406	1382.2	2128	0.89	-0.05
75vCKI	0	1	1984	0	1	0	0	1066.21	0.87	-0.06	-0.05	-0.07	1034.95	1099.11	1820.68	0.82	-0.09
5kDoYO	0	1	1948	0	1	0	0	2379.63	0.87	-0.06	-0.1	-0.02	2436.95	2322.3	2198.72	0.89	-0.05
wyQSfE	1	1	1964	0	1	0	0	2298.03	0.87	-0.06	-0.05	-0.07	2340.65	2253.16	2619.3	0.92	-0.04
qIn3yT	0	1	1957	0	1	0	0	2213.28	0.87	-0.06	-0.08	-0.05	2425.75	2000.8	2032.88	0.9	-0.05
iw739o	1	2	1964	0	1	0	0	2162.03	0.87	-0.06	-0.12	0	2028.25	2295.8	2464.95	0.74	-0.13
DUPIht	1	1	1985	0	1	0	0	2144.97	0.87	-0.06	-0.02	-0.1	2237.42	2057.15	2106.85	0.93	-0.03
HTD4w2	1	1	1975	0	1	0	0	2006.9	0.87	-0.06	-0.05	-0.07	2270.9	1729	1866.3	0.9	-0.05
xksKFC	1	1	1959	0	1	0	0	1811.41	0.87	-0.06	-0.07	-0.05	1842.65	1778.53	1700.43	0.8	-0.1
beCKV0	1	3	1960	0	1	0	0	1802.53	0.87	-0.06	-0.11	-0.02	2091	1514.05	2005.13	0.87	-0.06
m3INnr	1	1	1981	0	1	0	0	1389.51	0.87	-0.06	-0.07	-0.05	1278.26	1495.2	1453.08	0.93	-0.03
rYObRs	0	2	1949	0	1	0	0	3603.03	0.87	-0.06	-0.06	-0.06	3575.32	3629.35	4045.97	0.81	-0.09
gw4AhK	1	1	1988	0	1	0	0	2886.26	0.86	-0.06	-0.07	-0.05	2854.25	2919.95	3208.98	0.86	-0.06
L9SFYn	1	1	1949	0	1	0	0	2558.31	0.86	-0.06	-0.08	-0.05	2993.05	2145.3	2696.55	0.74	-0.13
ut3r8q	1	1	1972	0	1	0	0	2290.93	0.86	-0.06	-0.14	0	2170.95	2410.9	3332.95	0.93	-0.03
9aJrnX	1	1	1956	0	1	0	0	2187.05	0.86	-0.06	-0.07	-0.05	2049.2	2324.9	2182.83	0.95	-0.02
0wa9tM	1	1	1988	0	1	0	0	1300.07	0.86	-0.06	-0.06	-0.07	1370.93	1224.14	1584.9	0.7	-0.15
tJbvzE	1	1	1957	0	1	0	0	1626.67	0.86	-0.06	-0.12	-0.02	1787	1474.35	1530.73	0.9	-0.05
Eni1Xm	1	1	1954	0	1	0	0	2802.5	0.86	-0.07	-0.11	-0.03	2872.45	2732.55	2616.63	0.79	-0.1
9j6z6F	1	1	1971	0	1	0	0	2487.05	0.86	-0.07	-0.05	-0.08	2093.7	2880.4	2440.58	0.97	-0.01
cfQmB3	1	1	1950	0	1	0	0	2280.67	0.86	-0.07	0	-0.11	2231.83	2313.22	2358.18	0.74	-0.13
W5IVrt	0	1	1952	0	1	0	0	2826.1	0.85	-0.07	-0.05	-0.09	2686.5	2965.7	2459.64	0.84	-0.08
N8mKT6	0	2	1948	0	1	0	0	2757.48	0.85	-0.07	-0.12	-0.02	2614.3	2900.65	1854.18	0.8	-0.1
lZ92hj	1		1978	0	1	0	0	2503.83	0.85	-0.07	-0.07	-0.07	2389.15	2618.5	1958.93	0.9	-0.05
Mxzx4l	1	1	1960	0	1	0	0	2395.73	0.85	-0.07	-0.02	-0.12	2360.55	2430.9	2474.2	0.97	-0.01
RuX17J	1	2	1975	0	1	0	0	2386.33	0.85	-0.07	-0.07	-0.07	2237.35	2535.3	2092.6	0.88	-0.06
u2RSOR	0	3	1950	0	1	0	0	2353.38	0.85	-0.07	-0.1	-0.05	2441.2	2265.55	3436.24	0.93	-0.03
gz7jPZ	1	1	1981	0	1	0	0	2319.8	0.85	-0.07	-0.15	0	2198.6	2441	2295.88	0.77	-0.11
sifWNm	1	1	1959	0	1	0	0	2078.8	0.85	-0.07	-0.05	-0.1	2273.5	1884.1	2035.83	0.92	-0.04
fLypSZ	0	1	1949	0	1	0	0	2010.25	0.85	-0.07	-0.07	-0.07	1813.45	2207.05	2644.82	0.84	-0.08
elQuqu	1	1	1972	0	1	0	0	2008.6	0.85	-0.07	-0.1	-0.05	2033.55	1983.65	2225.95	0.73	-0.14
eC6AKm	1	1	1988	0	1	0	0	1963.03	0.85	-0.07	-0.12	-0.02	2017.7	1908.35	2464.8	0.9	-0.05
qfKtRu	0	1	1977	0	1	0	0	1952.7	0.85	-0.07	-0.05	-0.1	1948.05	1957.35	1949.48	0.92	-0.03
M0akxH	0	1	1988	0	1	0	0	1909.8	0.85	-0.07	-0.07	-0.07	1816.6	2003	2582.93	0.93	-0.03
gbhWEb	1	1	1970	0	1	0	0	1903.68	0.85	-0.07	-0.02	-0.12	1827.45	1979.9	2325.63	0.9	-0.05
XobdZJ	1	1	1952	0	1	0	0	1816.2	0.85	-0.07	-0.07	-0.07	1717.3	1915.1	2436.35	0.7	-0.15
wS1wu0	0	1	1968	0	1	0	0	1785.83	0.85	-0.07	-0.1	-0.05	1818.1	1753.55	2755.9	0.97	-0.01
rI5cBJ	1	1	1950	0	1	0	0	1768.98	0.85	-0.07	-0.02	-0.12	1629.35	1908.6	2294.9	0.81	-0.09
WNSUo8	1	1	1968	0	1	0	0	1722.45	0.85	-0.07	-0.05	-0.1	1725	1719.9	1966.48	0.93	-0.03
VNPVSB	0	1	1977	0	1	0	0	1644.93	0.85	-0.07	-0.07	-0.07	1572	1717.85	1449.95	0.97	-0.01
VSCA0V	0	1	1980	0	1	0	0	1575.23	0.85	-0.07	-0.1	-0.05	1437.2	1713.25	2337.5	0.78	-0.11
2EK7jS	1	1	1967	0	1	0	0	1555.08	0.85	-0.07	-0.12	-0.02	1494.4	1615.75	2311.21	0.94	-0.02
vVtVHL	1	1	1960	0	1	0	0	1536.13	0.85	-0.07	-0.1	-0.05	1626.15	1446.1	2061.73	0.74	-0.13
VV43mn	0	1	1957	0	1	0	0	1433.43	0.85	-0.07	-0.1	-0.05	1608.4	1258.45	1924.78	1	0
bx4VFk	1	2	1978	0	1	0	0	1421.23	0.85	-0.07	-0.07	-0.07	1416.3	1426.15	2168.93	0.92	-0.03
SCZxuN	1	1	1969	0	1	0	0	1412.73	0.85	-0.07	-0.1	-0.05	1359.65	1465.8	1688.6	0.78	-0.11
6q8EIn	0	1	1985	0	1	0	0	1404.93	0.85	-0.07	-0.12	-0.02	1492.7	1317.15	1909.6	0.92	-0.03
qzBJWu	0	1	1981	0	1	0	0	1397.85	0.85	-0.07	-0.12	-0.02	1571	1224.7	1177.23	0.9	-0.05
cmxvWz	1	1	1984	0	1	0	0	1354.58	0.85	-0.07	-0.07	-0.07	1390.45	1318.7	1865.44	0.89	-0.05
MFbwwP	0	1	1968	0	1	0	0	1316.3	0.85	-0.07	-0.05	-0.1	1166.65	1465.95	1797.74	0.74	-0.13
y7H976	1	1	1975	0	1	0	0	1288.73	0.85	-0.07	-0.07	-0.07	1246.7	1330.75	1605.5	0.78	-0.11
VFUlWI	1	1	1978	0	1	0	0	1286.78	0.85	-0.07	-0.05	-0.1	1129	1444.55	1573.48	0.9	-0.05
6Md4Nj	1	1	1985	0	1	0	0	1264.05	0.85	-0.07	-0.05	-0.1	1284.85	1243.25	1710.28	0.97	-0.01
p14k3w	1	1	1963	0	1	0	0	1260.55	0.85	-0.07	-0.07	-0.07	1364.1	1157	2081.95	0.9	-0.05
iEGn7T	1	1	1976	0	1	0	0	1160.23	0.85	-0.07	-0.05	-0.1	1148.05	1172.4	1571.3	0.85	-0.07
Dh8jKm	1	1	1982	0	1	0	0	1137.95	0.85	-0.07	-0.05	-0.1	1196.55	1079.35	1623.03	0.85	-0.07
IfLHFl	1	2	1974	0	1	0	0	1045.28	0.85	-0.07	-0.05	-0.1	941.4	1149.15	1228.93	0.98	-0.01
Cdo7Ps	1	1	1990	0	1	0	0	986.63	0.85	-0.07	-0.12	-0.02	1069.3	903.95	2198.73	0.92	-0.03
XJFFw1	1	1	1986	0	1	0	0	827.85	0.85	-0.07	-0.1	-0.05	782.55	873.15	989.03	0.83	-0.08
zdGIPf	0	1	1987	0	1	0	0	2331.78	0.85	-0.07	-0.15	0	2338.8	2324.75	2675.1	0.9	-0.05
SvAuZX	1	1	1975	0	1	0	0	2329.78	0.85	-0.07	-0.02	-0.13	2422.8	2236.75	2481.3	0.87	-0.06
zNCv4J	0	1	1959	0	1	0	0	2268.23	0.85	-0.07	-0.1	-0.05	2297.25	2239.2	1282.95	0.98	-0.01
pxAVFA	1	1	1945	0	1	0	0	2591.48	0.84	-0.07	-0.12	-0.03	2533.65	2649.3	3074.03	0.86	-0.07
kl7Ocq	1	2	1967	0	1	0	0	3035.5	0.84	-0.07	-0.08	-0.07	2917.25	3153.75	3050.31	0.69	-0.16
DDvk4Z	0	1	1978	0	1	0	0	2930.73	0.84	-0.07	-0.05	-0.1	2957.8	2903.65	2740.79	0.97	-0.01
4cCEJM	1	1	1958	0	1	0	0	2281.53	0.84	-0.07	-0.05	-0.11	2124.9	2438.15	2083.45	0.97	-0.01
9B7f7l	1	1	1960	0	1	0	0	2119.1	0.84	-0.07	-0.07	-0.07	2131.45	2106.11	2182.11	0.95	-0.02
nAsaM6	0	2	1957	0	1	0	0	2103.72	0.84	-0.07	-0.07	-0.08	1814.75	2407.89	2549.33	0.82	-0.09
TCFAK0	0	2	1983	0	1	0	0	2082.05	0.84	-0.07	-0.05	-0.11	1897.15	2276.68	2496.28	0.95	-0.02
UkNHro		1	1964	0	1	0	0	1990.67	0.84	-0.07	-0.1	-0.05	2099.35	1876.26	1921.48	0.98	-0.01
JX1s5s	0	1	1958	0	1	0	0	1856.28	0.84	-0.07	-0.07	-0.07	2031.75	1671.58	1814.38	0.8	-0.1
09MRT4	1	1	1984	0	1	0	0	1601.21	0.84	-0.07	-0.1	-0.05	1402.68	1789.8	2255.3	0.93	-0.03
F7ilg2	0	1	1967	0	1	0	0	1464.48	0.84	-0.07	-0.07	-0.08	1214.5	1714.45	1154.05	0.8	-0.1
OwDoWQ	0	1	1976	0	1	0	0	3363.28	0.84	-0.08	-0.05	-0.1	3354.45	3372.58	3508.16	0.85	-0.07
FCMRqJ	0	1	1999	0	1	0	0	2566.56	0.84	-0.08	-0.07	-0.08	2463.95	2664.05	2613.05	0.69	-0.16
b8Ds2z	1	1	1978	0	1	0	0	2367.82	0.84	-0.08	-0.1	-0.05	2200.8	2543.63	2292.46	0.95	-0.02
kTp8mL	1	2	1988	0	1	0	0	2216.26	0.84	-0.08	-0.07	-0.08	2113.16	2314.2	2304.13	0.86	-0.06
QuYGrX	1	1	1987	0	1	0	0	1933.15	0.84	-0.08	-0.14	-0.02	1960.05	1907.6	1515	0.95	-0.02
yzI1E2	1	2	1958	0	1	0	0	2030.31	0.83	-0.08	-0.13	-0.03	1750.9	2324.42	1427.25	0.83	-0.08
befbOb	1	1	1978	0	1	0	0	2423.49	0.83	-0.08	-0.15	-0.02	2204.05	2631.95	2152.73	0.9	-0.05
BbkaBY	1	1	1987	0	1	0	0	2094.41	0.83	-0.08	-0.07	-0.09	1974.05	2221.11	2407.45	0.61	-0.22
JH5ybR	1	1	1970	0	1	0	0	2119.3	0.83	-0.08	-0.07	-0.1	2139.1	2099.5	2946.21	0.59	-0.23
GZIFRg	1	1	1973	0	1	0	0	2080.5	0.83	-0.08	-0.05	-0.12	1828.9	2332.1	2385.53	0.77	-0.11
5yB2tU	1	1	1972	0	1	0	0	1805.88	0.83	-0.08	-0.15	-0.02	1846.1	1765.65	2676.58	0.82	-0.09
YAKBus	1	1	1980	0	1	0	0	1772.33	0.83	-0.08	-0.12	-0.05	1956.85	1587.8	2217.68	0.9	-0.05
CfIkVg	0	1	1959	0	1	0	0	1766.78	0.83	-0.08	-0.07	-0.1	1768.95	1764.6	1561.5	0.95	-0.02
8ImTAV	1		1960	0	1	0	0	1723.75	0.83	-0.08	-0.1	-0.07	1740.05	1707.45	1791.35	0.75	-0.12
X1PX5W	0	3	1972	0	1	0	0	1723.03	0.83	-0.08	-0.07	-0.1	1772.25	1673.8	1750.15	1	0
XfenSg	1	1	1954	0	1	0	0	1686.95	0.83	-0.08	-0.07	-0.1	1898.05	1475.85	2726.53	0.71	-0.15
GIEKIb	1	1	1971	0	1	0	0	1561.55	0.83	-0.08	-0.1	-0.07	1434.9	1688.2	1757.88	0.75	-0.12
pMJc9r	0	2	1949	0	1	0	0	1469.85	0.83	-0.08	-0.05	-0.12	1452.5	1487.2	1664.4	0.9	-0.05
yBP1VK	1	1	1985	0	1	0	0	1402.25	0.83	-0.08	-0.12	-0.05	1446.85	1357.65	1847.7	0.8	-0.1
PeZwPt	1	1	1989	0	1	0	0	1358.75	0.83	-0.08	-0.1	-0.07	1303.5	1414	2052.1	0.84	-0.07
N4TiFS	1	1	1984	0	1	0	0	1307.75	0.83	-0.08	-0.15	-0.02	1355.4	1260.1	1624.25	0.83	-0.08
ohYUh7	0	1	1987	0	1	0	0	1255.38	0.83	-0.08	-0.12	-0.05	1486.55	1024.2	1402.08	0.93	-0.03
GdFg1q	1	1	1986	0	1	0	0	1166.35	0.83	-0.08	-0.1	-0.07	1216.5	1116.2	2228.83	0.75	-0.12
i47B0a	1	1	1954	0	1	0	0	1037.38	0.83	-0.08	-0.12	-0.05	1051.5	1023.25	1974.88	0.95	-0.02
BDqFCd		1	1970	0	1	0	0	888.08	0.83	-0.08	-0.07	-0.1	853.55	922.6	2205.08	0.89	-0.05
XCpboJ	1	2	1983	0	1	0	0	2856.85	0.82	-0.09	-0.07	-0.1	2658.1	3055.6	3792.44	0.61	-0.21
my8yyQ		1	1983	0	1	0	0	2652.78	0.82	-0.09	-0.13	-0.05	2624.65	2680.9	2416.7	0.95	-0.02
3rKF5y	0	2	1946	0	1	0	0	1985.95	0.82	-0.09	-0.02	-0.15	1865.05	2106.85	2280.5	0.8	-0.1
1rCSYj	0	1	1954	0	1	0	0	1809.23	0.82	-0.09	-0.07	-0.1	1812.1	1806.35	2106.28	0.87	-0.06
Afc1TS	1	1	1955	0	1	0	0	1793.03	0.82	-0.09	-0.1	-0.07	1692.55	1893.5	2634.03	0.89	-0.05
ZtaKB2	1	1	1959	0	1	0	0	1547.03	0.82	-0.09	-0.12	-0.05	1399.55	1702.26	2366.03	0.97	-0.01
XqBk1m	0	1	1962	0	1	0	0	1533.46	0.82	-0.09	-0.07	-0.1	1533.58	1533.35	2550.95	0.54	-0.27
DEXoJi	1	1	1953	0	1	0	0	2702.92	0.82	-0.09	-0.1	-0.07	2523.85	2891.42	2704.54	0.68	-0.16
iSmUsb	1	1	1987	0	1	0	0	2693.08	0.82	-0.09	-0.08	-0.1	2491.53	2884.55	2247.78	0.92	-0.03
IitOHz	0	1	1977	0	1	0	0	1917.73	0.82	-0.09	-0.07	-0.1	2006.95	1828.5	1439.18	0.88	-0.06
KOVrd0	1	1	1974	0	1	0	0	2628.15	0.81	-0.09	-0.18	-0.02	2751.5	2504.8	2249.56	0.89	-0.05
tzjnrq	1	1	1961	0	1	0	0	2311.74	0.81	-0.09	-0.07	-0.11	2135	2479.65	1834.85	0.65	-0.19
xUAIgc	1	2	1952	0	1	0	0	2944.31	0.81	-0.09	-0.12	-0.07	3129.68	2768.2	2785.46	0.92	-0.04
etWurA	1	1	1945	0	1	0	0	2755.95	0.81	-0.09	-0.18	-0.02	2772.68	2739.21	3670.37	0.79	-0.1
dk8FHc	1	1	1982	0	1	0	0	3098.87	0.8	-0.1	-0.15	-0.05	3086.37	3111.37	2971.15	0.56	-0.26
eK6WSN	1	1	1975	0	1	0	0	2506.3	0.8	-0.1	-0.1	-0.1	2619.2	2393.4	2215.63	0.92	-0.03
79ZAAG	1	1	1988	0	1	0	0	2435.21	0.8	-0.1	-0.13	-0.06	2300.2	2577.32	2500.79	0.97	-0.01
GDkDh1	1	1	1949	0	1	0	0	2266.88	0.8	-0.1	-0.12	-0.07	2277.25	2256.5	1787.31	0.84	-0.07
JmlpFK	0	1	1956	0	1	0	0	2205.1	0.8	-0.1	-0.05	-0.15	2173.05	2237.15	2358.18	0.73	-0.14
7U4psM	1	1	1981	0	1	0	0	1976.53	0.8	-0.1	-0.07	-0.12	1870.25	2082.8	2916.33	0.63	-0.2
3Y4B0d	0	1	1958	0	1	0	0	1777.38	0.8	-0.1	-0.1	-0.1	1731.35	1823.4	1630.1	0.98	-0.01
XMVPqC	0	1	1967	0	1	0	0	1600.9	0.8	-0.1	-0.19	-0.02	1732.85	1468.95	1444.08	0.9	-0.05
dmiu3H	1	1	1954	0	1	0	0	1575.9	0.8	-0.1	-0.07	-0.12	1464.7	1687.1	1756.95	0.9	-0.05
3LH2T8	1	1	1979	0	1	0	0	1554.23	0.8	-0.1	-0.1	-0.1	1572.6	1535.85	1782.1	0.65	-0.19
4md7Sl	0	2	1970	0	1	0	0	1487.88	0.8	-0.1	-0.1	-0.1	1628.8	1346.95	2332.78	0.92	-0.03
SA30Pk	1	1	1986	0	1	0	0	1267.48	0.8	-0.1	-0.12	-0.07	1392.7	1142.25	1653.4	0.8	-0.1
jPJFzP	1	1	1960	0	1	0	0	1259.88	0.8	-0.1	-0.07	-0.12	1238.45	1281.3	1154.13	0.95	-0.02
Gqo66U	0	2	1982	0	1	0	0	1205.05	0.8	-0.1	-0.07	-0.12	1035.95	1374.15	1256.6	0.93	-0.03
txLWRx	1	1	1983	0	1	0	0	2322.33	0.79	-0.1	-0.07	-0.13	2169.05	2475.6	2209.03	0.97	-0.01
B4J0aF		1	1966	0	1	0	0	2094.73	0.79	-0.1	-0.1	-0.1	1811.1	2378.35	2372.08	0.77	-0.11
OZ9vsX	1	3	1953	0	1	0	0	1840.51	0.79	-0.1	-0.07	-0.13	1770.6	1914.11	1941.3	0.75	-0.12
f1v3hh	1	1	1951	0	1	0	0	1807.05	0.79	-0.1	-0.05	-0.15	1811.1	1803	1563.65	0.95	-0.02
zsGasC	1	1	1953	0	1	0	0	1563.95	0.79	-0.1	-0.1	-0.1	1601.89	1527.9	1669.88	0.92	-0.03
G2q8yW	1	1	1980	0	1	0	0	3067.65	0.79	-0.1	-0.18	-0.03	2936.15	3199.15	1982.8	0.77	-0.11
tSdQK3	1	1	1994	0	1	0	0	2619.62	0.79	-0.1	-0.1	-0.11	2424.75	2824.74	1882.55	0.9	-0.05
pn9TBi		2	1971	0	1	0	0	2384.08	0.79	-0.1	-0.07	-0.13	2693.8	2074.35	2357.45	0.85	-0.07
2RJeKo	1	1	1942	0	1	0	0	2332.92	0.79	-0.1	-0.1	-0.1	2155.53	2501.45	3234.05	0.91	-0.04
3KrraR	1	1	1967	0	1	0	0	1529.15	0.79	-0.1	-0.1	-0.1	1425.63	1627.5	1616.85	0.76	-0.12
ifRONb	0	1	1979	0	1	0	0	2705.92	0.78	-0.11	-0.1	-0.12	2478.8	2945	2015.31	0.92	-0.04
xIsj8C	1	1	1970	0	1	0	0	2198.65	0.78	-0.11	-0.12	-0.08	2149.45	2247.85	2373.78	0.95	-0.02
5jADqJ	1	1	1986	0	1	0	0	2197.95	0.78	-0.11	-0.11	-0.1	2111.21	2284.68	3141.92	1	0
gj0fqe	1	1	1944	0	1	0	0	2084.92	0.78	-0.11	-0.11	-0.1	2064.94	2102.9	1874.13	0.88	-0.06
KLvjdd	1	1	1988	0	1	0	0	3048.89	0.78	-0.11	-0.05	-0.16	3127.06	2978.55	3215.34	0.79	-0.1
GlIHUO	1		1974	0	1	0	0	2078.05	0.78	-0.11	-0.12	-0.1	2082.05	2074.05	2500.13	0.9	-0.05
0ZPfmH	1	3	1971	0	1	0	0	1588.15	0.78	-0.11	-0.19	-0.05	1656.5	1519.8	2140.51	0.78	-0.11
zttet1	1	1	1969	0	1	0	0	1461.7	0.78	-0.11	-0.07	-0.15	1298.75	1624.65	1736.03	0.74	-0.13
eWBOcU	1	1	1962	0	1	0	0	1349.2	0.78	-0.11	-0.15	-0.07	1454.6	1243.8	2114.26	0.84	-0.08
NrRRVx	1	1	1979	0	1	0	0	1034.88	0.78	-0.11	-0.19	-0.05	1054.8	1014.95	1609.36	0.76	-0.12
lcmNTr	1	1	1981	0	1	0	0	1012.45	0.78	-0.11	-0.1	-0.12	964.8	1060.1	1237.1	0.75	-0.12
XEtQAd	1	1	1945	0	1	0	0	3156.33	0.77	-0.11	-0.05	-0.19	3011.05	3301.6	4115.47	0.91	-0.04
mLB2EV	1	1	1964	0	1	0	0	3120.36	0.77	-0.11	-0.14	-0.08	2975.11	3258.35	3737.66	0.88	-0.06
G2a3kK	1	2	1961	0	1	0	0	2894.79	0.77	-0.11	-0.07	-0.16	2796.4	3004.11	1787.08	0.67	-0.18
wjFwcm	1	2	1956	0	1	0	0	1693.85	0.77	-0.11	-0.16	-0.07	1706.9	1680.8	2384.48	0.83	-0.08
YpRoo5	0	2	1971	0	1	0	0	1441.65	0.77	-0.11	-0.07	-0.16	1274.35	1608.95	2174.9	0.93	-0.03
HURo4x	1	2	1975	0	1	0	0	2932.9	0.76	-0.12	-0.1	-0.14	2709.4	3156.4	3536.15	0.72	-0.14
0rtfIv	1	1	1982	0	1	0	0	2403.1	0.76	-0.12	-0.15	-0.08	2432.05	2372.63	1917.95	0.74	-0.13
0j9sYC	0	1	1947	0	1	0	0	2016.95	0.76	-0.12	-0.1	-0.13	2110.5	1923.4	2439.25	0.84	-0.07
Wb3gMQ	1	1	1980	0	1	0	0	1937.33	0.75	-0.12	-0.19	-0.07	1999.9	1874.75	2404.18	0.58	-0.24
tqGlMb	1	1	1982	0	1	0	0	1601.65	0.75	-0.12	-0.15	-0.1	1550.85	1652.45	909.97	0.53	-0.28
hZFmj3	1	2	1946	0	1	0	0	1245.45	0.75	-0.12	-0.22	-0.05	1284.9	1206	1343.15	0.78	-0.11
NnltyS	1	1	1983	0	1	0	0	2396	0.74	-0.13	-0.15	-0.1	2516.65	2275.35	2873.33	0.78	-0.11
eQMeMD	1	1	1984	0	1	0	0	2169.23	0.74	-0.13	-0.16	-0.1	2070.5	2267.95	2860.9	0.77	-0.11
Kkft9e	1	1	1954	0	1	0	0	2029.93	0.74	-0.13	-0.16	-0.1	1958.85	2101	2289	0.88	-0.06
Vi5QEO	0	1	1970	0	1	0	0	1667.58	0.74	-0.13	-0.13	-0.12	1784.95	1550.2	2189.1	1	0
FD6Vte		1	1960	0	1	0	0	1021.21	0.74	-0.13	-0.12	-0.13	1077.35	962.11	1386.8	0.83	-0.08
nAMI7c	1	1	1981	0	1	0	0	2996.79	0.74	-0.13	-0.14	-0.12	2836.8	3165.21	2774.26	0.87	-0.06
1ywcZt	0	1	1934	0	1	0	0	2996.16	0.74	-0.13	-0.19	-0.08	2869.68	3122.63	2743.78	0.67	-0.18
d7ta9I	1	1	1951	0	1	0	0	1836.8	0.74	-0.13	-0.21	-0.07	2098	1575.6	2138.25	0.81	-0.09
eUHZX2	1	2	1961	0	1	0	0	2245.4	0.73	-0.14	-0.19	-0.1	2257.9	2232.9	2293.1	0.64	-0.19
DXbNip	0	3	1979	0	1	0	0	2202.2	0.73	-0.14	-0.15	-0.12	2191.3	2213.1	2157.2	0.7	-0.15
KzeQt3	1	1	1991	0	1	0	0	2171.8	0.73	-0.14	-0.07	-0.22	2377.5	1966.1	1999.48	0.88	-0.06
yG7U41	1	1	1976	0	1	0	0	2037.88	0.73	-0.14	-0.26	-0.05	1831.15	2244.6	1824.9	0.74	-0.13
3WO8qQ	1	1	1937	0	1	0	0	2036.95	0.73	-0.14	-0.15	-0.12	2048	2025.9	2463.13	0.74	-0.13
CFXmgH	1	1	1986	0	1	0	0	1693.38	0.73	-0.14	-0.26	-0.05	1551.35	1835.4	2122.26	0.9	-0.05
n4GRND	0	1	1951	0	1	0	0	1487.85	0.73	-0.14	-0.15	-0.12	1409.45	1566.25	2294.75	0.95	-0.02
xrZqth	1	2	1990	0	1	0	0	1141.78	0.73	-0.14	-0.12	-0.15	1177.35	1106.2	1971.8	0.85	-0.07
ADWiJI	1	1	1959	0	1	0	0	2668.76	0.72	-0.14	-0.2	-0.08	2686.47	2651.05	2693.7	0.92	-0.03
rmlagn	1	2	1981	0	1	0	0	2392.65	0.72	-0.14	-0.18	-0.11	2235.95	2549.35	2344	0.82	-0.09
aaj3nW	0	2	1948	0	1	0	0	2372.7	0.72	-0.14	-0.13	-0.15	2284.6	2460.8	2269.45	0.83	-0.08
2YhDsu	1	1	1987	0	1	0	0	1779.68	0.72	-0.14	-0.1	-0.2	1793	1766.35	1815.98	0.85	-0.07
avRQzr	1	1	1952	0	1	0	0	1559.28	0.72	-0.14	-0.1	-0.2	1523.25	1595.3	1436.28	0.6	-0.22
BxFxce	0	1	1949	0	1	0	0	2855.97	0.71	-0.15	-0.08	-0.23	2639	3072.95	2911.08	0.97	-0.01
ZnAlAC	0	1	1977	0	1	0	0	1969.27	0.7	-0.15	-0.12	-0.18	1937.2	1996	2236.59	0.87	-0.06
mxnzTt	1	1	1953	0	1	0	0	1629.38	0.7	-0.15	-0.12	-0.19	1638.4	1620.35	2012.48	0.74	-0.13
qFCRz8	1	1	1976	0	1	0	0	2852.85	0.69	-0.16	-0.2	-0.12	2883.4	2822.3	2492.15	0.77	-0.11
9iq018	1	1	1990	0	1	0	0	2438.28	0.69	-0.16	-0.22	-0.1	2662.55	2214	3548.1	0.84	-0.08
qnVZ9l	0	3	1984	0	1	0	0	1835.63	0.69	-0.16	-0.19	-0.13	2000.05	1671.2	2632.37	0.64	-0.19
amLnpg	1	1	1960	0	1	0	0	2019.4	0.68	-0.16	-0.13	-0.2	1984.65	2054.15	2433.43	0.86	-0.07
4DgPuB	0	3	1985	0	1	0	0	2935.79	0.68	-0.17	-0.19	-0.15	3048.95	2822.63	3101.28	0.69	-0.16
2M06sN	1	1	1976	0	1	0	0	2126.5	0.68	-0.17	-0.24	-0.11	2092.05	2160.95	1863.73	0.93	-0.03
iODYZG	1	1	1980	0	1	0	0	2442.7	0.68	-0.17	-0.15	-0.19	2440.25	2445.15	2055.45	0.82	-0.09
l5xM2e		1	1970	0	1	0	0	1260.13	0.68	-0.17	-0.26	-0.1	1276.6	1243.65	1141.83	0.78	-0.11
aom92n	1	1	1986	0	1	0	0	1083.83	0.68	-0.17	-0.15	-0.19	1079.55	1088.1	2347.67	0.82	-0.09
eu5bIq	0	1	1951	0	1	0	0	1298.08	0.67	-0.18	-0.12	-0.24	1289	1307.63	2814.51	0.5	-0.3
Uu0NYZ	1	1	1963	0	1	0	0	1637.97	0.66	-0.18	-0.2	-0.16	1613	1661.7	2207.31	0.66	-0.18
rF71nm	1	1	1923	0	1	0	0	3505.33	0.65	-0.19	-0.2	-0.18	3398.46	3604.57	3806.46	0.68	-0.17
qRwZUB	0	1	1977	0	1	0	0	1390.5	0.64	-0.19	-0.12	-0.28	1090.5	1690.5	2126.15	0.72	-0.14
lTj8Df	1	2	1953	0	1	0	0	2544.1	0.63	-0.2	-0.35	-0.1	2467.58	2616.8	1439.4	0.95	-0.02
Ykvexf	0	1	1956	0	1	0	0	1586.18	0.63	-0.2	-0.19	-0.21	1454.75	1724.53	2205.55	0.85	-0.07
3nqTh8	1	1	1984	0	1	0	0	1017.9	0.63	-0.2	-0.15	-0.26	1097.15	938.65	1189.78	0.85	-0.07
gOTXUi	1	1	1947	0	1	0	0	2316.41	0.62	-0.21	-0.2	-0.21	2413.75	2213.95	2459.69	0.82	-0.09
nEmUp3	0	1	1961	0	1	0	0	852.54	0.62	-0.21	-0.2	-0.22	687.42	1009.4	1256.9	0.62	-0.21
4FaMmB	1	1	1957	0	1	0	0	2202.7	0.6	-0.22	-0.22	-0.22	2339	2066.4	2382.23	0.5	-0.3
bApDBM	0	1	1945	0	1	0	0	1745.5	0.6	-0.22	-0.22	-0.22	1795.2	1695.8	1858.58	0.55	-0.26
j0XoM3	1	2	1991	0	1	0	0	1304.6	0.6	-0.22	-0.19	-0.26	1429.45	1179.75	2407.79	0.84	-0.07
IKk90C	1	1	1959	0	1	0	0	2128.95	0.59	-0.23	-0.21	-0.24	2324.1	1923.53	2078.33	0.8	-0.1
orklxZ	1	1	1948	0	1	0	0	2923.46	0.58	-0.23	-0.26	-0.21	2855.55	2994.95	3017.62	0.91	-0.04
IywtPJ	1	2	1957	0	1	0	0	2836.08	0.58	-0.24	-0.26	-0.22	3219.74	2471.6	3302.42	0.92	-0.04
1dvTFy	1	1	1960	0	1	0	0	2114.5	0.58	-0.24	-0.22	-0.26	2122.8	2106.2	3019.75	0.45	-0.35
R21iVx	0	1	1981	0	1	0	0	1894.48	0.58	-0.24	-0.3	-0.19	2002.55	1786.4	2843.45	0.67	-0.18
bSlFOC	0	1	1958	0	1	0	0	1181.25	0.58	-0.24	-0.15	-0.35	1233.85	1128.65	2593.1	0.89	-0.05
ZkGd6e	0	3	1948	0	1	0	0	1861.51	0.57	-0.25	-0.26	-0.23	1795.45	1931.05	1752.45	0.47	-0.32
WNEzFn	1	1	1979	0	1	0	0	2272.28	0.55	-0.26	-0.12	-0.46	2359.7	2184.85	2138.18	0.78	-0.11
vzUNPi	1	1	1978	0	1	0	0	1479.6	0.55	-0.26	-0.26	-0.26	1648.7	1310.5	2703.11	0.61	-0.21
rky8Jl	1	1	1959	0	1	0	0	1266.05	0.55	-0.26	-0.3	-0.22	1295.5	1236.6	2001.48	0.9	-0.05
g8SAvy	0	1	1980	0	1	0	0	1228.6	0.55	-0.26	-0.4	-0.15	1325.85	1131.35	3062.18	0.69	-0.16
VwVyuA	0	1	1976	0	1	0	0	1387.93	0.53	-0.28	-0.3	-0.26	1580.75	1195.1	2298.28	0.89	-0.05
SuLrjA	1	1	1946	0	1	0	0	2542.95	0.52	-0.29	-0.36	-0.23	2805.6	2280.3	2643.69	0.7	-0.15
b4Vflj	1	1	1986	0	1	0	0	2376.87	0.51	-0.29	-0.35	-0.24	2492.68	2266.85	2163.64	0.84	-0.07
UKbTvj	0	1	1941	0	1	0	0	2674.6	0.5	-0.3	-0.24	-0.38	2731.2	2618	3496.24	0.64	-0.2
EmyJN5	1		1960	0	1	0	0	2364.58	0.5	-0.3	-0.4	-0.24	2434.2	2314.86	2801.64	0.97	-0.01
y6yMor	1	1	1971	0	1	0	0	2790.74	0.46	-0.34	-0.28	-0.4	2695.53	2881.2	2682.73	0.38	-0.41
djxhd0	1	1	1969	0	1	0	0	1387.65	0.45	-0.35	-0.35	-0.35	1315.45	1459.85	2094.03	0.74	-0.13
qmzc5R	1	1	1985	0	1	0	0	813.97	0.42	-0.37	-0.3	-0.48	791.33	841.13	783.89	0.63	-0.2
LRR3nP	1	1	1968	0	1	0	0	2364.08	0.42	-0.38	-0.52	-0.26	2229	2499.15	2824	0.86	-0.06
p3x935	1	1	1982	0	1	0	0	1886.88	0.41	-0.39	-0.52	-0.28	1954.15	1819.6	3027.9	0.8	-0.1
R4qQTv	1	1	1980	0	1	0	0	1146.25	0.4	-0.4	-0.7	-0.22	1131.9	1160.6	2564.48	0.67	-0.18
leGhlI	1	1	1968	0	1	0	0	1826.67	0.39	-0.4	-0.43	-0.38	1966.9	1679.05	1550.03	0.43	-0.37
TZj5Ol	1	1	1969	0	1	0	0	1993.97	0.23	-0.64	-0.5	-0.82	1975.32	2011.7	2295.23	0.63	-0.2
wVPYMU	0	1	1973	0	1	0	0	1498.95	0.08	-1.12	-1	-1.3	1335.15	1662.75	2493.2	1	0
DzfJLx	0	1	1979	0	1	0	0	2165.41	0.03	-1.57		-1.26	1956.05	2364.3	2230.63	0.97	-0.01
hMRXJ0	1	2	1968	0		0		1768.3	0.98	-0.01	-0.02	0	1899.5	1637.1	1838.88	0.93	-0.03
jP52BD	1	1	1966	0		0		1328.58	0.98	-0.01	-0.02	0	1340.65	1316.5	1586.65	0.9	-0.05
gz5edt	1	1	1974	0		0		1171.98	0.95	-0.02	-0.05	0	1247.95	1096	1261.6	0.95	-0.02
YvurDp	1	2	1964	0		0		1871.15	0.85	-0.07	-0.07	-0.07	1973.25	1769.05	1811.78	0.95	-0.02
iSWva0		1	1941	0		0		2638.98	0.7	-0.15	-0.22	-0.1	2753.7	2524.25	2698.79	0.56	-0.26
5jPlz7	1	1	1965	0		0		1426.23	1	0	0	0	1624.05	1218	2154.08	0.97	-0.01
vqqEmB	1	2	1986	0		0		1327.38	0.98	-0.01	-0.02	0	1322.65	1332.1	3187	0.82	-0.08
StBoG9	1	2	1961	0		0		1674.35	1	0	0	0	1728.6	1620.1	2130.1	1	0
6nxG1o	0	1	1963	0		0		1347.7	0.9	-0.05	-0.07	-0.02	1229.05	1466.35	1929.44	0.92	-0.04
lU7ra6		1	1955	0		0		1214.4	0.9	-0.05	-0.05	-0.05	1262.4	1166.4	2116.03	0.72	-0.14
I42wKV	1	3	1958	0		0		3050.4	0.71	-0.15	-0.18	-0.11	2821.3	3279.5	2727.08	0.84	-0.08
Ykxogr	1	1	1976	0		0		1951.93	1	0	0	0	1691.5	2212.35	1643.28	0.93	-0.03
5qcsMN		1	1958	0		0		1943.82	1	0	0	0	1765.6	2141.83	2483.1	0.87	-0.06
dQY3D2		1	1977	0		0		1577.7	1	0	0	0	1683.1	1472.3	1490.75	1	0
G9vaxR	0	1	1988	0		0		1556.18	1	0	0	0	1649.05	1463.3	2033.93	1	0
fBCPZB	0	3	1968	0		0		1027.08	1	0	0	0	1015.35	1038.8	895.83	1	0
SBU73b		1	1991	0		0		1504.2	0.98	-0.01	-0.02	0	1530.85	1477.55	1497.95	0.92	-0.03
KgNPMY	0	1	1991	0		0		1414.55	0.98	-0.01	-0.02	0	1422.8	1406.3	2451.21	0.95	-0.02
MRORm3	0	1	1976	0		0		1294.15	0.98	-0.01	0	-0.02	1300.75	1287.55	1442.13	1	0
kZlXaf	1	1	1975	0		0		1217.4	0.98	-0.01	0	-0.02	1278.35	1156.45	1420.8	0.92	-0.03
qwuebP	0	1	1974	0		0		1183.83	0.98	-0.01	-0.02	0	1192.9	1174.75	3114.19	0.94	-0.03
G5HV5v	1	1	1979	0		0		1178.55	0.98	-0.01	-0.02	0	1308.95	1048.15	1188.38	0.98	-0.01
yVUZOk	0	1	1968	0		0		1118.5	0.98	-0.01	-0.02	0	1158.3	1078.7	1126	0.93	-0.03
nck4Dy	1	1	1980	0		0		1087.85	0.98	-0.01	-0.02	0	1045.2	1130.5	1627.75	1	0
dzTcMM		1	1964	0		0		1075.78	0.98	-0.01	-0.02	0	1101.2	1050.35	1598.58	0.98	-0.01
6bzjEe	1	1	1956	0		0		955.35	0.98	-0.01	-0.02	0	978.95	931.75	1294.36	0.95	-0.02
xm55jC	1	1	1988	0		0		1940.08	0.97	-0.01	-0.02	0	2016.15	1864	1943.75	0.95	-0.02
4FfS6F	0	1	1944	0		0		2405.95	0.97	-0.01	-0.02	0	2666.65	2131.53	2335.83	0.18	-0.76
ZLcuar	1	1	1958	0		0		2074.6	0.95	-0.02	-0.02	-0.02	2147.8	2001.4	2264.85	0.88	-0.06
nr1IOI	0	1	1969	0		0		1887.55	0.95	-0.02	-0.02	-0.02	1879.8	1895.3	1920.43	0.92	-0.03
e4i2MM	1	1	1958	0		0		1870.25	0.95	-0.02	-0.05	0	1748.15	1992.35	2276.38	0.84	-0.07
ColwhZ	1	2	1965	0		0		1656.33	0.95	-0.02	-0.05	0	1707.5	1605.15	2582.41	0.92	-0.04
qhGYtG	1		1968	0		0		1631.8	0.95	-0.02	-0.02	-0.02	1787	1476.6	1837.18	0.87	-0.06
NFH6aB	1	1	1980	0		0		1594.1	0.95	-0.02	-0.05	0	1656.95	1531.25	995.63	0.95	-0.02
0Hnval	1	1	1976	0		0		1445.4	0.95	-0.02	-0.02	-0.02	1408.9	1481.9	1565.25	0.95	-0.02
E7iFQ8	0	1	1969	0		0		1355.98	0.95	-0.02	-0.02	-0.02	1427.85	1284.1	1381.56	0.92	-0.03
bRoFXV	0		1958	0		0		1309.15	0.95	-0.02	-0.05	0	1353.1	1265.2	1771.23	0.97	-0.01
Q70XwZ	0	1	1976	0		0		1268.58	0.95	-0.02	-0.02	-0.02	1208.3	1328.85	2076.1	0.95	-0.02
Cryr23	1	1	1980	0		0		1129.28	0.95	-0.02	-0.05	0	1232.9	1025.65	1351.5	0.98	-0.01
EL5r1B	0	1	1970	0		0		1078.25	0.95	-0.02	-0.05	0	1210.15	946.35	1411.18	0.95	-0.02
jssJMu	0	1	1988	0		0		1049.38	0.95	-0.02	-0.05	0	1096.95	1001.8	1843.85	0.87	-0.06
QlRqmf	0	1	1955	0		0		1895.2	0.95	-0.02	-0.05	0	1874.9	1915.5	2744.37	0.75	-0.12
Wwi9QP	1	1	1954	0		0		1663.08	0.95	-0.02	-0.05	0	1634.75	1691.4	1947.68	0.87	-0.06
q8HVbI	0	1	1962	0		0		2242.79	0.95	-0.02	-0.05	0	2539.35	1930.63	2506.48	0.92	-0.03
BBqnYm	0	2	1988	0		0		1851.2	0.93	-0.03	-0.05	-0.02	1744.45	1957.95	1751.69	0.97	-0.01
0hkPfD	0	1	1986	0		0		1754.13	0.93	-0.03	-0.02	-0.05	1707	1801.25	2903.55	1	0
PM5Xe0	1	1	1967	0		0		1583.25	0.93	-0.03	-0.07	0	1611.85	1554.65	1950.1	0.92	-0.04
1BZIAO	0	1	1989	0		0		973.6	0.93	-0.03	-0.05	-0.02	938.5	1008.7	2259.58	0.72	-0.14
nEYq9S	0	2	1988	0		0		2456.55	0.92	-0.03	-0.05	-0.02	2719.4	2193.7	2766.9	1	0
2XagnD	1	1	1965	0		0		1589.9	0.92	-0.03	-0.02	-0.05	1362.5	1817.3	2457.34	1	0
m6fUYp	1		1955	0		0		1461.83	0.92	-0.03	0	-0.07	1349.05	1574.6	1608.65	0.87	-0.06
G2phXg	1	1	1970	0		0		2009.97	0.92	-0.04	-0.07	0	2086.32	1937.45	2607.9	0.92	-0.04
n1d2Dt	1	1	1973	0		0		2006.28	0.92	-0.04	-0.05	-0.02	1904.75	2107.8	1428.5	0.85	-0.07
5AlzWd	0	1	1963	0		0		2083.3	0.9	-0.05	-0.07	-0.02	1779.2	2387.4	2486.3	0.85	-0.07
pGG8Y4	1	1	1956	0		0		1827.65	0.9	-0.05	-0.05	-0.05	1688.15	1967.15	1957.9	0.85	-0.07
4iOftY	0	1	1982	0		0		1799.95	0.9	-0.05	-0.07	-0.02	1615.8	1984.1	2048.88	0.97	-0.01
tsMqCc	1	1	1958	0		0		1621.25	0.9	-0.05	-0.05	-0.05	1553.25	1689.25	2687	0.92	-0.04
boJgaz	0	1	1980	0		0		1473.1	0.9	-0.05	-0.07	-0.02	1364.1	1582.1	2180.43	0.84	-0.08
XXUhWp	1	1	1959	0		0		1468.78	0.9	-0.05	-0.05	-0.05	1370.35	1567.2	2700.67	0.82	-0.09
8Rms8r	1	1	1964	0		0		1166.85	0.9	-0.05	-0.05	-0.05	1261.4	1072.3	1945.6	0.95	-0.02
xJTtpv		1	1985	0		0		2417.23	0.89	-0.05	-0.07	-0.03	2205.45	2629	3485.65	0.67	-0.18
h1hKIj	0	1	1965	0		0		1878.85	0.88	-0.06	-0.1	-0.02	2202.35	1555.35	1887.05	0.85	-0.07
oypRUf	1	1	1951	0		0		1690.38	0.88	-0.06	-0.05	-0.07	1659.45	1721.3	1854.53	0.9	-0.05
1glEwl	1	1	1963	0		0		1540	0.88	-0.06	-0.07	-0.05	1601.95	1478.05	1885.53	0.72	-0.14
FNW4TM	0	1	1955	0		0		1423.9	0.88	-0.06	-0.07	-0.05	1592.2	1255.6	1828.83	0.8	-0.1
km7hbv	1	1	1970	0		0		2289.03	0.84	-0.07	-0.05	-0.11	2229.75	2351.42	1616.58	0.9	-0.05
rMSKiK	0	2	1968	0		0		1944.18	0.84	-0.07	-0.05	-0.1	2023.58	1868.75	2869.9	0.83	-0.08
8UeCHk	1	1	1958	0		0		1787.93	0.83	-0.08	-0.15	-0.02	1715.65	1860.2	2425.4	0.87	-0.06
DkxQ7e	1	1	1966	0		0		1732.13	0.83	-0.08	-0.05	-0.12	1770.05	1694.2	1710.88	0.9	-0.05
etV8zd		3	1961	0		0		1650.58	0.83	-0.08	-0.19	0	1740.2	1560.95	1759.1	0.9	-0.05
B18esY	1	3	1958	0		0		2819.05	0.82	-0.08	-0.05	-0.13	2906.25	2722.17	3159.05	0.85	-0.07
hxSj8x	1	1	1988	0		0		2103.68	0.82	-0.09	-0.08	-0.1	2189.3	2018.05	2340.25	0.9	-0.05
lRbbFO	1	1	1966	0		0		2091.03	0.8	-0.1	-0.07	-0.12	2035.9	2146.15	2222.41	0.82	-0.09
f56yHH	1	1	1957	0		0		2601.98	0.78	-0.11	-0.12	-0.1	2599.1	2604.85	2028.83	0.95	-0.02
D6Mpjf	1	1	1950	0		0		1681.55	0.78	-0.11	-0.12	-0.1	1643.6	1719.5	1581.78	0.83	-0.08
SGpazD	0	1	1985	0		0		1250.4	0.78	-0.11	-0.1	-0.12	1171.9	1328.9	1694.11	0.58	-0.24
zJWtq8		1	1987	0		0		1780.15	0.77	-0.11	-0.1	-0.12	2020.15	1540.15	1612.25	0.93	-0.03
HPpLnC		1	1941	0		0		1984.49	0.76	-0.12	-0.1	-0.13	1820.74	2140.05	1874.43	0.88	-0.06
FXn1Qi	1	1	1941	0		0		2399.31	0.71	-0.15	-0.13	-0.16	2328	2474.37	2550	0.67	-0.18
hLCGkP	1	1	1948	0		0		2309.55	0.7	-0.15	-0.12	-0.19	2347.8	2271.3	2166.93	0.58	-0.24
yPlG42	0	2	1986	0		0		1625.8	0.7	-0.15	-0.12	-0.19	1697.5	1554.1	2572.8	0.83	-0.08
dQSIl4	1	1	1969	0		0		3202.49	0.68	-0.17	-0.13	-0.2	3452.21	2938.89	3142.23	0.65	-0.19
ob0kUH	1	1	1963	0		0		2503.78	0.59	-0.23	-0.28	-0.19	2504.55	2503	2820.8	0.5	-0.3
2xo4xd	0		1997	0		0		3394.26	0.59	-0.23	-0.23	-0.23	3830.11	2980.2	2784.52	0.5	-0.3
lbWpF8	1	1	1987	0	1		0	1817.5	1	0	0	0	1732.35	1902.65	1810.33	0.82	-0.09
uQrfQF	1	1	1964	0	1		0	1583.48	1	0	0	0	1523.6	1643.35	1771.65	0.9	-0.05
ej70Ye	1	1	1987	0	1		0	1806.68	0.98	-0.01	-0.02	0	1984.3	1629.05	2230.69	0.79	-0.1
zDJM8A	1	1	1985	0	1		0	1644.7	0.97	-0.01	-0.02	0	1748.3	1541.1	2539.77	0.89	-0.05
ymYFZ8	1	1	1979	0	1		0	1121.6	0.95	-0.02	-0.02	-0.02	1206.7	1036.5	1663.68	0.85	-0.07
kjoc69	0	1	1975	0	1		0	1118.38	0.95	-0.02	-0.05	0	1109.35	1127.4	1589.23	0.93	-0.03
7ua7BH	1	1	1990	0	1		0	882.93	0.95	-0.02	-0.05	0	942.35	823.5	1313.4	0.73	-0.14
aNmtOZ	0	1	1973	0	1		0	1144.95	0.93	-0.03	-0.05	-0.02	1257.3	1032.6	2004.7	0.9	-0.05
k1ZMwU	1	1	1972	0	1		0	1781.33	0.92	-0.03	-0.05	-0.02	1850.15	1712.5	2490.97	0.89	-0.05
Xwaob4	1	1	1963	0	1		0	1389.78	0.9	-0.05	-0.07	-0.02	1478.85	1300.7	1779.3	0.85	-0.07
K7SV8N	1	1	1969	0	1		0	1273.1	0.9	-0.05	-0.07	-0.02	1411.5	1134.7	1564.6	1	0
kdR1BE	1	1	1985	0	1		0	2061.6	0.8	-0.1	-0.12	-0.07	2167.8	1955.4	2163.7	0.85	-0.07
ObR0Tc	1	1	1944	0	1		0	1994.15	0.8	-0.1	-0.12	-0.07	2128.65	1859.65	2803.97	0.81	-0.09
QH1l9r	1	1	1956	0	1		0	1603.93	0.78	-0.11	-0.12	-0.1	1693.8	1514.05	2352.59	0.71	-0.15
Hz6bPi	0	1	1966	0	1		0	1432.5	0.73	-0.14	-0.15	-0.12	1477.2	1387.8	2253.31	0.84	-0.07
dSA9SN	1	2	1973	0	1		0	2116.85	0.64	-0.19	-0.22	-0.16	2035.25	2198.45	3116.84	0.65	-0.19
poTbNO		1	2000	0	1		0	1256.94	0.56	-0.25	-0.22	-0.28	1114.73	1369.21	857.38	0.5	-0.3
pmbhNp	0	1	1969	0				1277	1	0	0	0	1339.85	1214.15	1801.53	0.97	-0.01
WQ6g7X	0	1	1979	0				1418.8	0.98	-0.01	-0.02	0	1378.25	1459.35	1405.6	0.98	-0.01
5Ke55Z	0	1	1984	0				1116.83	0.98	-0.01	-0.02	0	1150.15	1083.5	1236.25	0.93	-0.03
I20KAK	0	1	1986	0				1084.45	0.98	-0.01	-0.02	0	1150.45	1018.45	1577.65	0.98	-0.01
uwjDg7	1	1	1969	0				1959.23	0.97	-0.01	-0.02	0	1975	1943.45	2491.63	0.9	-0.05
1OEMcu	1	1	1972	0				1601.5	0.95	-0.02	-0.05	0	1624.05	1578.95	2280.58	0.8	-0.1
mPwiFX	1	1	1983	0				1014.28	0.95	-0.02	-0.05	0	1016.65	1011.9	1434.55	0.98	-0.01
SFPpXc	1	1	1978	0				2533.73	0.95	-0.02	-0.02	-0.02	2856.4	2211.05	2271	0.89	-0.05
slO1hd	1	1	1989	0				1998.9	0.95	-0.02	-0.05	0	2090.15	1907.65	2597.53	0.91	-0.04
Q8iGin	1	1	1966	0				1659.43	0.93	-0.03	-0.05	-0.02	1659.25	1659.6	2184.2	1	0
f2UVnr	1	1	1957	0				1287.88	0.93	-0.03	-0.05	-0.02	1245.65	1330.1	1585.48	0.78	-0.11
WbmLXN	1	1	1930	0				1271.15	0.93	-0.03	-0.07	0	1491.55	1050.75	1526.48	0.93	-0.03
2X9zYs	0	1	1979	0				1513.2	0.92	-0.03	-0.05	-0.02	1561.1	1465.3	1353.75	0.95	-0.02
B8u2O3		1	1950	0				1423.5	0.92	-0.04	-0.05	-0.02	1399.9	1447.1	1738.43	0.95	-0.02
isUic1	1	1	1970	0				2000.13	0.9	-0.05	-0.07	-0.02	2042.15	1958.1	2630.16	0.77	-0.11
ZsgXq2	1	1	1979	0				906.9	0.9	-0.05	-0.07	-0.02	871.05	942.75	1327.3	0.97	-0.01
LjSeom	1	1	1987	0				2137.93	0.9	-0.05	-0.07	-0.02	2120.35	2155.5	2875.84	0.68	-0.17
92OyDP		1	1975	0				1549.05	0.87	-0.06	-0.07	-0.05	1343.45	1754.65	1955.88	0.75	-0.12
IfTPH2	1	1	1988	0				2452.55	0.87	-0.06	-0.11	-0.02	2321.55	2583.55	2357.88	0.95	-0.02
6PzgYb	0	1	1986	0				1251.71	0.84	-0.07	-0.02	-0.13	1227	1276.42	1785.93	0.95	-0.02
7IlVA7	0		1982	0				1150.43	0.8	-0.1	-0.12	-0.07	1306.35	994.5	1724.28	0.9	-0.05
Hda7vz	0	1	1997	0				2357.13	0.53	-0.28	-0.48	-0.14	2324.1	2391.89	1092.63	0.37	-0.43
